# Supplementary material for: Green glycosylation promoted by reusable biomass carbonaceous solid acid: an easy access to β-stereoselective terpene galactosides
Source: Royal Society of Chemistry journal article supplement (doi:10.1039/c0gc00883d), 2011-01-01

## Supporting Information

Green glycosylation promoted by reusable biomass carbonaceous  
solid acid: An easy access to  $\beta$ -stereoselective terpene galactosides

Bala Kishan Gorityala, Jimei Ma, Kalyan Kumar Pasunooti, Shuting Cai and Xue-Wei Liu\*

21 Nanyang Link, Division of Chemistry and Biological Chemistry, School of Physical &  
Mathematical Sciences, Nanyang Technological University, Singapore 637371.

E-mail: [xuewei@ntu.edu.sg](mailto:xuewei@ntu.edu.sg)

## Experimental section:

**General:** All reagents and solvents were obtained from commercial suppliers and used without further purification unless otherwise stated. Evaporation of organic solutions was achieved by rotary evaporation with a water bath temperature below 40 °C. Product purification by flash column chromatography was accomplished using silica gel 60 (0.010–0.063 mm). Chromatograms were visualized by staining using base solution of potassium permanganate. Technical grade solvents were used for chromatography and distilled prior to use. NMR spectra were recorded at room temperature on 400 MHz Bruker DPX 400 spectrometers. The residual solvent signals were taken as the reference (7.26 ppm and 4.78 ppm for  $^1\text{H}$  NMR spectra and 77.0 ppm and 49.1 ppm for  $^{13}\text{C}$  NMR spectra in  $\text{CDCl}_3$  and methanol- $\text{d}_4$  respectively. Chemical shift ( $\delta$ ) is reported in ppm, coupling constants ( $J$ ) are given in Hz. The following abbreviations classify the multiplicity: s = singlet, d = doublet, t = triplet, m = multiplet or unresolved. HRMS (ESI) spectra were recorded on a Waters Q-ToF premier<sup>TM</sup> mass spectrometer. Elemental analysis was measured on Perkin Elmer Series II CHNS/O Analyzer 2400. Powder X-ray diffraction (XRD) was collected from Shimadzu 6000 diffractometer. Carbonization of D-glucose was carried out on Carbolite 1200 °C three zone tube furnace.

### Preparation of carbon-based solid acid catalyst (1a):

D-Glucose powder (2 g) was heated at 400 °C for 15 h under  $\text{N}_2$  flow to produce a black carbon solid. The solid was ground to fine powder and heated in 20 mL of conc.  $\text{H}_2\text{SO}_4$  (>96%) at 150 °C under  $\text{N}_2$ . After heating for 15 h and then cooling to room temperature, the mixture was diluted with 100 mL of distilled water. The black precipitate was collected by filtration and washed repeatedly with hot distilled water (>80 °C) until pH 7 was observed in filtrate. The resulting black solid was then washed with methanol (30 mL) followed by diethyl ether (30 mL). It was further dried at 60 °C *in vacuo* prior to use. Elemental analysis revealed that sulfur content is 1.13 wt% which is equivalent to 0.35 mmol  $\text{SO}_3\text{H}$  per gram of catalyst.

**Figure S1. XRD profile for the sulfonated carbon based solid acid.**

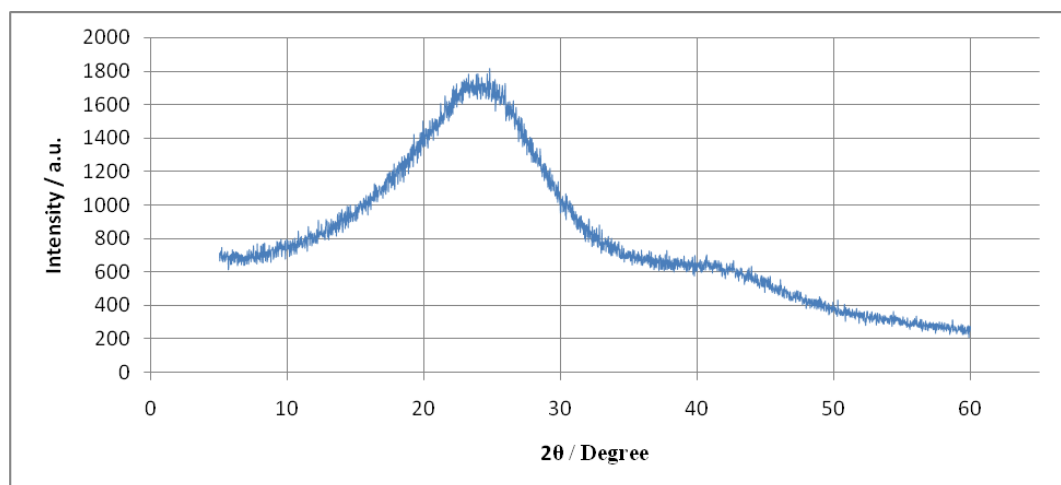

**A typical procedure for neat glycosylation of monosaccharides with aglycones:**

To a mixture of monosaccharide (1 eq) and aglycone (10 eq) was added 5 mol% solid acid catalyst and the reaction mixture was heated at 80 °C and stirred for 8 hrs. When the monosaccharide is completely consumed (TLC monitored), the reaction mixture was diluted with ethyl acetate and subjected to centrifugation. After the centrifugation, the remaining supernatant solution was decanted and this process is repeated for 3 times. The combined organic solutions were removed under reduced pressure followed by purification of the residue by silica gel chromatography to give the desired glycosides. The remaining solid acid catalyst was dried under reduced pressure to remove all the volatile components, and then reused in the next run. The NMR data of all the glycosides is in accordance with the reported literature data.

**A typical procedure for glycosylation of galactosyl trichloroacetimidates with acceptors:**

To a mixture of galactosyl trichloroacetimidate (1 eq) and acceptor (1.5 eq) in toluene (3 mL) was added 5 mol% solid acid catalyst and the reaction mixture was heated at 80 °C and stirred for appropriate amount of time (table 2) and the extent of reaction was monitored by TLC analysis. The reaction mixture was diluted with ethyl acetate

and subjected to centrifugation. After the centrifugation, the remaining supernatant solution was decanted and this process is repeated for 3 times. The combined organic solutions were removed under reduced pressure followed by purification of the residue by silica gel chromatography to give the desired  $\beta$ -galactosides. The remaining solid acid catalyst was dried under reduced pressure to remove all the volatile components, and then reused in the next run.

### Characterization of galactosides:

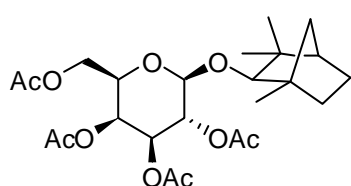

Fenchyl-2,3,4,6-tetraacetyl-*O*- $\beta$ -D-galactopyranoside:

$R_f$  (50% EtOAc/Hexane) 0.46;  $[\alpha]_D^{24}$   $-7.3$  ( $c = 0.1$ ,  $\text{CHCl}_3$ );  $^1\text{H NMR}$  (400 MHz,  $\text{CDCl}_3$ ):  $\delta$  5.37 (d,  $J = 2.7$  Hz, 1H), 5.21 (dd,  $J = 8.0, 10.3$  Hz, 1H), 5.00 (dd,  $J = 3.3, 10.3$  Hz, 1H), 4.32 (d,  $J = 8.0$  Hz, 1H), 4.09-4.14 (m, 2H), 3.85 (t,  $J = 6.3$  Hz, 1H), 3.03 (s, 1H), 2.16 (s, 3H), 2.04 (s, 3H), 2.03 (s, 3H), 1.98 (s, 3H), 1.66-1.59 (m, 4H), 1.26-1.43 (m, 3H), 0.96 (s, 3H), 0.85 (s, 3H);  $^{13}\text{C NMR}$  (100 MHz,  $\text{CDCl}_3$ ):  $\delta$  170.5, 70.4, 170.3, 169.4, 103.0, 94.6, 71.0, 70.4, 69.2, 67.3, 61.7, 49.1, 48.0, 41.0, 39.2, 29.7, 26.1, 25.6, 21.6, 20.9, 20.7, 20.6, 19.4; IR (neat)  $\nu_{\text{max}}/\text{cm}^{-1}$  1718, 1367, 1217, 1097; HRMS (ESI)  $m/z$   $[\text{M} + \text{Na}]^+$  calcd for  $\text{C}_{24}\text{H}_{36}\text{O}_{10}\text{Na}$  507.2206, found 507.2200.

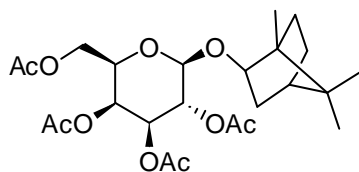

Bornyl-2,3,4,6-tetraacetyl-*O*- $\beta$ -D-galactopyranoside:  $R_f$

(50% EtOAc/Hexane) 0.46;  $[\alpha]_D^{24}$   $-14.5$  ( $c = 0.1$ ,  $\text{CHCl}_3$ );  $^1\text{H NMR}$  (400 MHz,  $\text{CDCl}_3$ ):  $\delta$  5.19 (t,  $J = 9.4$  Hz, 1H), 5.08 (t,  $J = 9.6$  Hz, 1H), 5.00 (dd,  $J = 8.1, 10.5$  Hz, 1H), 4.45 (d,  $J = 8.1$  Hz, 1H), 4.26 (dd,  $J = 4.8, 12.1$  Hz, 1H), 4.11 (dd,  $J = 2.5, 12.1$  Hz, 1H), 3.95 (d,  $J = 9.4$  Hz, 1H), 3.63-3.66 (m, 1H), 2.00-2.17 (m, 12 H), 1.85-1.88 (m, 1H), 1.60-1.70 (m, 2H), 1.17-1.25 (m, 2H), 1.05-1.07 (m, 1H), 0.81-0.94 (m, 7H);  $^{13}\text{C NMR}$  (100 MHz,  $\text{CDCl}_3$ ):  $\delta$  170.7, 170.4, 169.5, 169.2, 99.7, 84.1, 72.8, 71.6, 71.4, 68.8, 62.2, 49.1, 48.0, 44.9, 36.1, 28.3, 26.4, 20.7, 20.7, 20.6, 19.7, 18.9, 13.3. IR (neat)  $\nu_{\text{max}}/\text{cm}^{-1}$  1755, 1367, 1222, 1039; HRMS (ESI)  $m/z$   $[\text{M} + \text{Na}]^+$  calcd for  $\text{C}_{24}\text{H}_{36}\text{O}_{10}\text{Na}$  507.2206, found 507.2190.

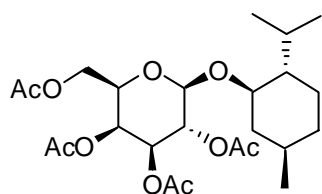

Menthyl-2,3,4,6-tetraacetyl-*O*- $\beta$ -D-galactopyranoside: *Rf*

(50% EtOAc/Hexane) 0.40;  $[\alpha]_D^{24}$  -240.2 ( $c = 0.1$ ,  $\text{CHCl}_3$ );

$^1\text{H}$  NMR (400 MHz,  $\text{CDCl}_3$ ):  $\delta$  5.20 (t,  $J = 9.5$  Hz, 1H),

5.04 (t,  $J = 9.7$  Hz, 1H), 4.93 (dd,  $J = 8.0, 9.6$  Hz, 1H),

4.54 (d,  $J = 8.0$  Hz, 1H), 4.18 (dd,  $J = 5.5, 12.0$  Hz, 1H), 4.11 (dd,  $J = 2.7, 12.0$  Hz,

1H), 3.67 (ddd,  $J = 2.7, 5.5, 9.9$  Hz, 1H), 3.38 (dt,  $J = 4.3, 10.7$  Hz, 1H), 2.21-2.23

(m, 1H), 2.05 (s, 3H), 2.03 (s, 3H), 2.02 (s, 3H), 1.99 (s, 3H), 1.93-1.96 (m, 1H),

1.60-1.64 (m, 2H), 1.58 (s, 3H), 1.31-1.35 (m, 1H), 1.17-1.25 (m, 1H), 0.91 (d,  $J =$

6.6 Hz, 4 H), 0.86 (d = 6.6 Hz, 3H), 0.77-0.81 (m, 2H), 0.72 (d,  $J = 6.9$  Hz, 3H);  $^{13}\text{C}$

NMR (100 MHz,  $\text{CDCl}_3$ ):  $\delta$  170.7, 170.4, 169.5, 169.3, 98.8, 79.1, 77.2, 73.1, 71.6,

71.5, 68.9, 62.5, 47.4, 40.8, 34.2, 31.5, 25.0, 23.0, 22.3, 20.9, 20.7, 20.7, 20.6, 20.6,

15.4; IR (neat)  $\nu_{\text{max}}/\text{cm}^{-1}$  1749, 1367, 1226, 1037; HRMS (ESI)  $m/z$   $[\text{M} + \text{Na}]^+$  calcd

for  $\text{C}_{24}\text{H}_{38}\text{O}_{10}\text{Na}$  509.2328, found 509.2332.

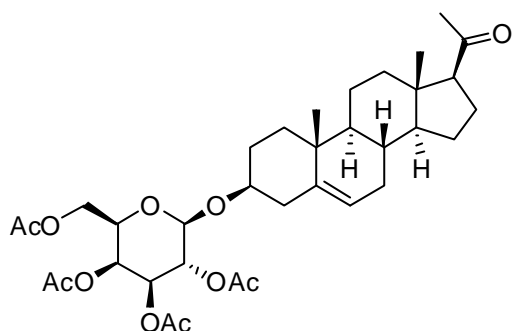

Pregnenolonyl-2,3,4,6-tetraacetyl-*O*- $\beta$ -D-

galactopyranoside: *Rf* (50% EtOAc/Hexane)

0.42;  $[\alpha]_D^{24}$  +46.96 ( $c = 0.1$ ,  $\text{CHCl}_3$ ):  $^1\text{H}$

NMR (400 MHz,  $\text{CDCl}_3$ ):  $\delta$  5.36 (m, 2H),

5.18 (dd,  $J = 8.0, 10.4$  Hz, 1H), 5.01 (dd,  $J =$

3.4, 10.4 Hz, 1H), 4.54 (d,  $J = 8.0$  Hz, 1H),

4.18 (dd,  $J = 6.6, 11.2$  Hz, 1H), 4.10 (dd,  $J = 7.1, 11.2$  Hz, 1H), 3.88 (t,  $J = 6.6$  Hz,

1H), 3.54-3.55 (m, 1H), 2.52 (t,  $J = 9.6$  Hz, 1H), 2.19-2.25 (m, 3H), 2.14 (s, 3H), 2.12

(s, 3H), 2.06 (s, 3H), 2.04 (s, 3H), 1.98 (s, 3H), 1.85-1.91 (m, 2H), 1.60-1.67 (m, 3H),

1.43-1.52 (m, 3H), 1.21-1.29 (m, 4H), 1.03-1.19 (m, H), 0.93-1.01 (m containing s,

4H), 0.89 (t,  $J = 7.0$  Hz, 1H), 0.62 (s, 3H);  $^{13}\text{C}$  NMR (100 MHz,  $\text{CDCl}_3$ ):  $\delta$  209.5,

170.4, 170.4, 170.2, 169.4, 140.3, 121.9, 100.3, 80.2, 71.0, 70.6, 69.1, 67.0, 63.7, 61.3,

56.9, 50.0, 44.0, 38.9, 38.8, 37.2, 36.7, 31.8, 31.8, 31.6, 29.5, 24.5, 22.8, 21.1, 20.8,

20.7, 20.6, 19.4, 13.2. IR (neat)  $\nu_{\text{max}}/\text{cm}^{-1}$  1749, 1367, 1217, 1055; HRMS (ESI)  $m/z$

$[\text{M} + \text{Na}]^+$  calcd for  $\text{C}_{35}\text{H}_{50}\text{O}_{11}\text{Na}$  669.3251, found 669.3242.

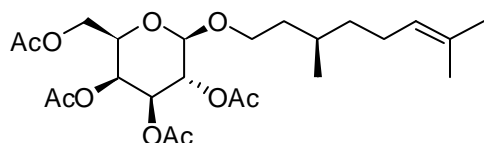

Citronellyl-2,3,4,6-tetraacetyl-*O*- $\beta$ -D-galactopyranoside: *R<sub>f</sub>* (50% EtOAc/Hexane)

0.37;  $[\alpha]_D^{24} +3.9$  ( $c = 0.1$ , CHCl<sub>3</sub>); <sup>1</sup>H NMR

(400 MHz, CDCl<sub>3</sub>):  $\delta$  5.19 (t,  $J = 9.5$  Hz, 1H), 5.08 (t,  $J = 9.6$  Hz, 2H), 4.97 (dd,  $J = 8.0, 9.5$  Hz, 1H), 4.48 (d,  $J = 8.0$  Hz, 1H), 4.26 (dd,  $J = 4.7, 12.3$  Hz, 1H), 4.13 (dd,  $J = 2.3, 12.3$  Hz, 1H), 3.89-3.94 (m, 1H), 3.68 (ddd,  $J = 2.3, 4.7, 9.9$  Hz, 1H), 3.46-3.52 (m, 1H), 2.09 (s, 3H), 2.03 (s, 3H), 2.02 (s, 3H), 2.00 (s, 3H), 1.9-1.99 (m, 2H), 1.49-1.67 (m containing s, 5H), 1.25-1.37 (m, 2H), 1.11-1.18 (m, 1H), 0.86 (d,  $J = 6.6$  Hz, 3H); <sup>13</sup>C NMR (100 MHz, CDCl<sub>3</sub>):  $\delta$  170.7, 170.4, 169.4, 169.3, 131.3, 124.6, 101.0, 72.9, 71.7, 71.3, 68.5, 68.5, 62.0, 37.2, 36.3, 29., 25.7, 25.4, 20.7, 20.6, 20.6, 19.1, 17.6; IR (neat)  $\nu_{\max}/\text{cm}^{-1}$  1749, 1371, 1226, 1056; HRMS (ESI)  $m/z$  [M + Na]<sup>+</sup> calcd for C<sub>24</sub>H<sub>38</sub>O<sub>10</sub>Na 509.2363, found 509.152352.

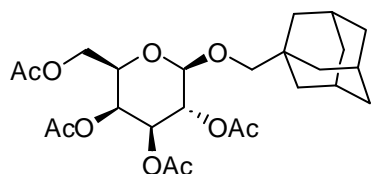

Adamantanemethanyl-2,3,4,6-tetraacetyl-*O*- $\beta$ -D-galactopyranoside: *R<sub>f</sub>* (50% EtOAc/Hexane) 0.55;

$[\alpha]_D^{24} -86.16$  ( $c = 0.2$ , CHCl<sub>3</sub>); <sup>1</sup>H NMR (400 MHz, CDCl<sub>3</sub>):  $\delta$  5.37 (d,  $J = 3.2$  Hz, 1H), 5.21 (dd,  $J = 8.2,$

10.4 Hz, 1H), 5.00 (dd,  $J = 3.2, 10.4$  Hz, 1H), 4.37 (d,  $J = 7.9$  Hz, 1H), 4.12-4.17 (m, 2H), 3.86 (t,  $J = 6.8$  Hz, 1H), 3.50 (d,  $J = 9.5$  Hz, 1H), 2.97 (d,  $J = 9.6$  Hz, 1H), 2.14 (s, 3H), 2.06 (s, 3H), 2.04 (s, 3H), 1.98 (s, 3H), 1.94 (m, 2H), 1.69-1.72 (m, 3H), 1.60-1.62 (m, 4H), 1.46-1.52 (m, 6H); <sup>13</sup>C NMR (100 MHz, CDCl<sub>3</sub>):  $\delta$  170.4, 170.4, 170.2, 169.3, 102.5, 81.1, 70.9, 70.5, 69.0, 67.1, 61.2, 39.3, 37.1, 33.9, 28.1, 20.8, 20.7, 20.6; IR (neat)  $\nu_{\max}/\text{cm}^{-1}$  1751, 1369, 1224, 1053; HRMS (ESI)  $m/z$  [M + Na]<sup>+</sup> calcd for C<sub>25</sub>H<sub>36</sub>O<sub>10</sub>Na 519.2206, found 519.2198.

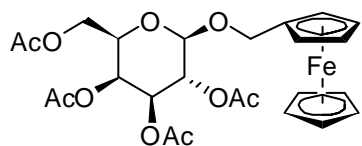

Ferrocenemethyl 2,3,4,6-tetraacetyl-*O*- $\beta$ -D-galactopyranoside: *R<sub>f</sub>* (50% EtOAc/Hexane) 0.42;

$[\alpha]_D^{24} +22.9$  ( $c = 0.6$ , CHCl<sub>3</sub>); <sup>1</sup>H NMR (400 MHz,

CDCl<sub>3</sub>):  $\delta$  5.36 (d,  $J = 3.2$  Hz, 1H), 5.18 (dd,  $J = 8.0, 10.2$  Hz, 1H), 4.96 (dd,  $J = 3.2, 10.2$  Hz, 1H), 4.63 (d,  $J = 11.8$ , 1H), 4.49 (d,  $J = 7.9$  Hz, 1H), 4.43 (d,  $J = 11.8$  Hz, 1H), 4.11-4.19 (m, 9H), 3.86 (t,  $J = 6.4$  Hz, 1H), 2.14 (s, 3H), 2.07 (s, 3H), 1.96 (s, 3H), 1.95 (s, 3H); <sup>13</sup>C NMR (100 MHz, CDCl<sub>3</sub>):  $\delta$  170.4, 170.3, 170.2, 169.4, 99.4,

82.0, 71.0, 70.6, 69.3, 69.0, 68.9, 68.8, 68.6, 68.5, 68.5, 67.4, 67.1, 61.3, 20.8, 20.7, 20.7, 20.6; IR (neat)  $\nu_{\max}/\text{cm}^{-1}$  1749, 1369, 1222, 1053; HRMS (ESI)  $m/z$   $[\text{M} + \text{Na}]^+$  calcd for  $\text{C}_{27}\text{H}_{36}\text{FeO}_{10}\text{Na}$  599.1556, found 599.1558.

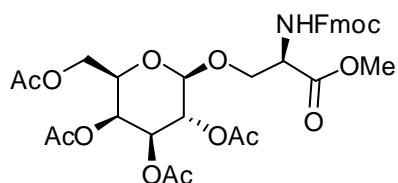

*N*-9-fluorenylmethoxycarbonyl-*O*-(2,3,4,6-tetra-*O*-acetyl- $\beta$ -D-galactopyranosyl)-L-serine methyl ester:

$R_f$  (50% EtOAc/Hexane) 0.25;  $[\alpha]_{\text{D}}^{24}$   $-7.3$  ( $c = 0.1$ ,  $\text{CHCl}_3$ );  $^1\text{H}$  NMR (400 MHz,  $\text{CDCl}_3$ ):  $\delta$  7.77 (d,  $J = 7.4$  Hz, 2H), 7.71 (m, 2H), 7.40 (m, 2H), 7.34 (t,  $J = 7.3$  Hz, 2H), 5.74 (d,  $J = 4.7$  Hz, 1H), 5.63 (d,  $J = 8.6$  Hz, 1H), 5.42 (s, 1H), 5.02 (dd,  $J = 3.0, 6.7$  Hz), 4.53 (d,  $J = 8.6$  Hz, 1H), 4.30-4.41 (m, 2H), 4.22-4.29 (m, 3H), 4.08-4.14 (m, 2H), 4.0 (dd,  $J = 2.2, 9.6$  Hz, 1H), 3.78 (s, 3H), 2.04-2.10 (m, 12H);  $^{13}\text{C}$  NMR (100 MHz,  $\text{CDCl}_3$ ):  $\delta$  170.4, 170.4, 170.0, 169.7, 155.9, 143.8, 143, 141.3, 127.7, 125.1, 121.0, 95.5, 73.9, 71.4, 69.2, 67.3, 65.8, 63.1, 61.3, 53.9, 52.7, 47.1, 23.5, 20.7, 20.5; IR (neat)  $\nu_{\max}/\text{cm}^{-1}$  1747, 1367, 1217, 1060; HRMS (ESI)  $m/z$   $[\text{M} + \text{Na}]^+$  calcd for  $\text{C}_{33}\text{H}_{37}\text{NO}_{14}\text{Na}$  694.2112, found 694.2082.

GBK-672, 1H NMR, 400 MHz CDC13

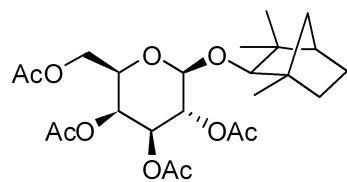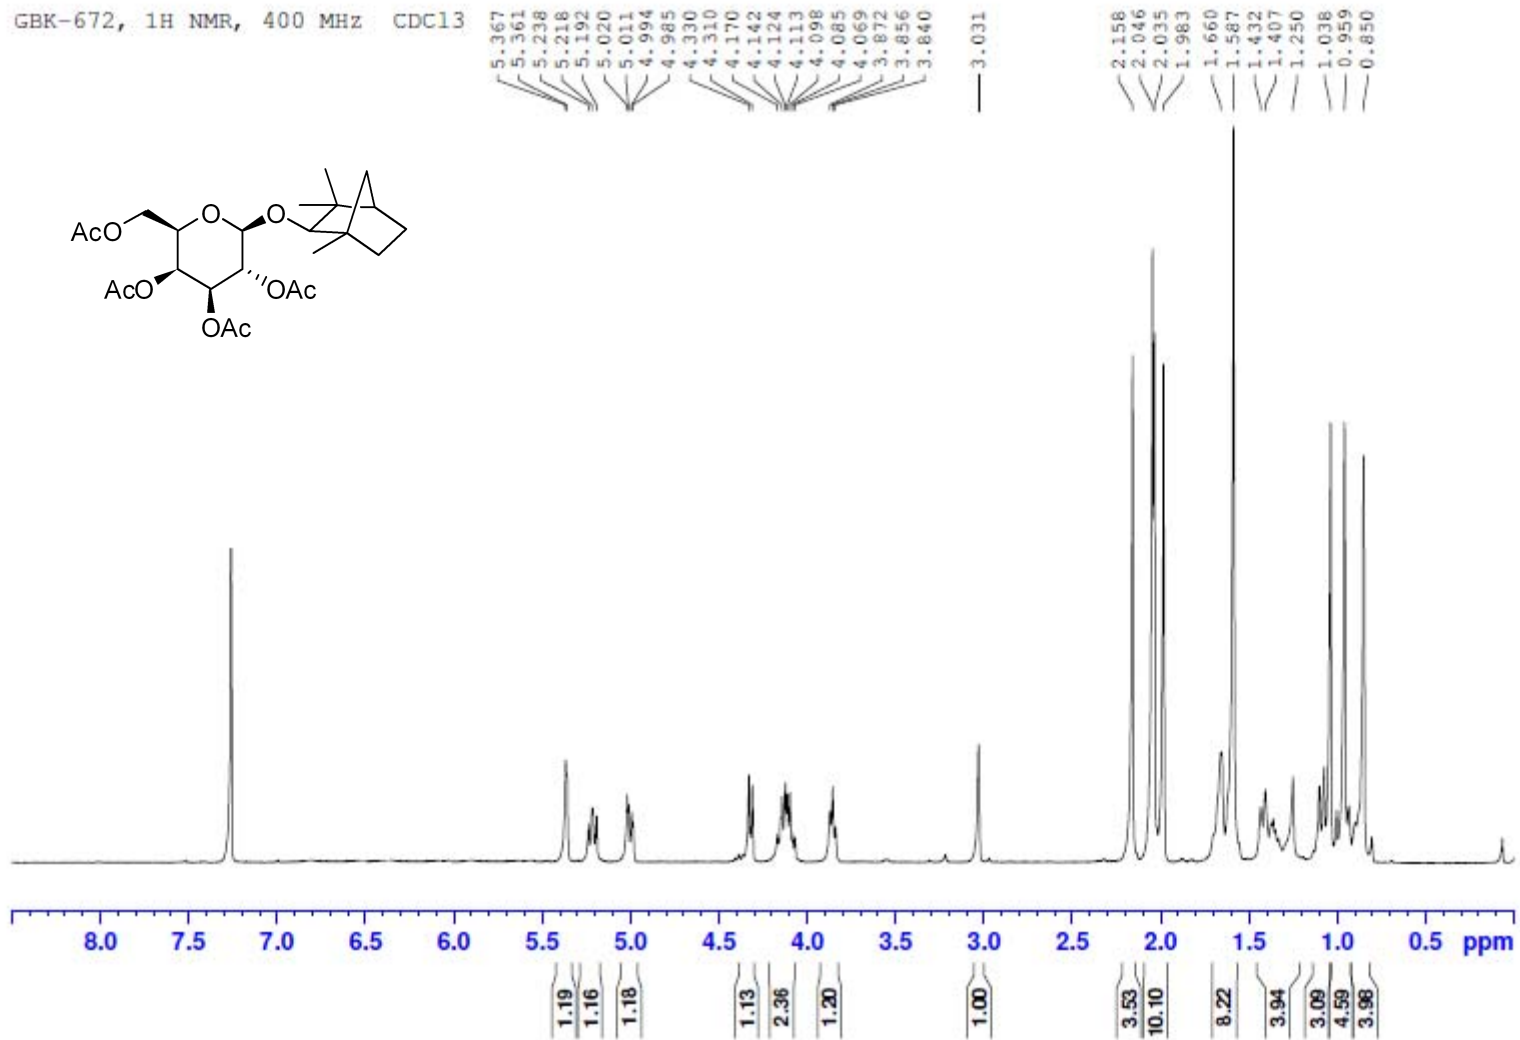



GBK-E-Fenchol-Carbon, 13C NMR, 400 MHz CDCl3

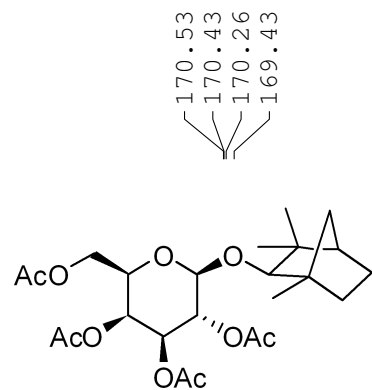

170.53  
170.43  
170.26  
169.43

103.01

94.63

70.95  
70.40  
69.23  
67.31  
61.75

49.07  
47.96

41.03  
39.15

29.69  
26.12  
25.64  
21.62  
20.86  
20.72  
20.63  
19.43

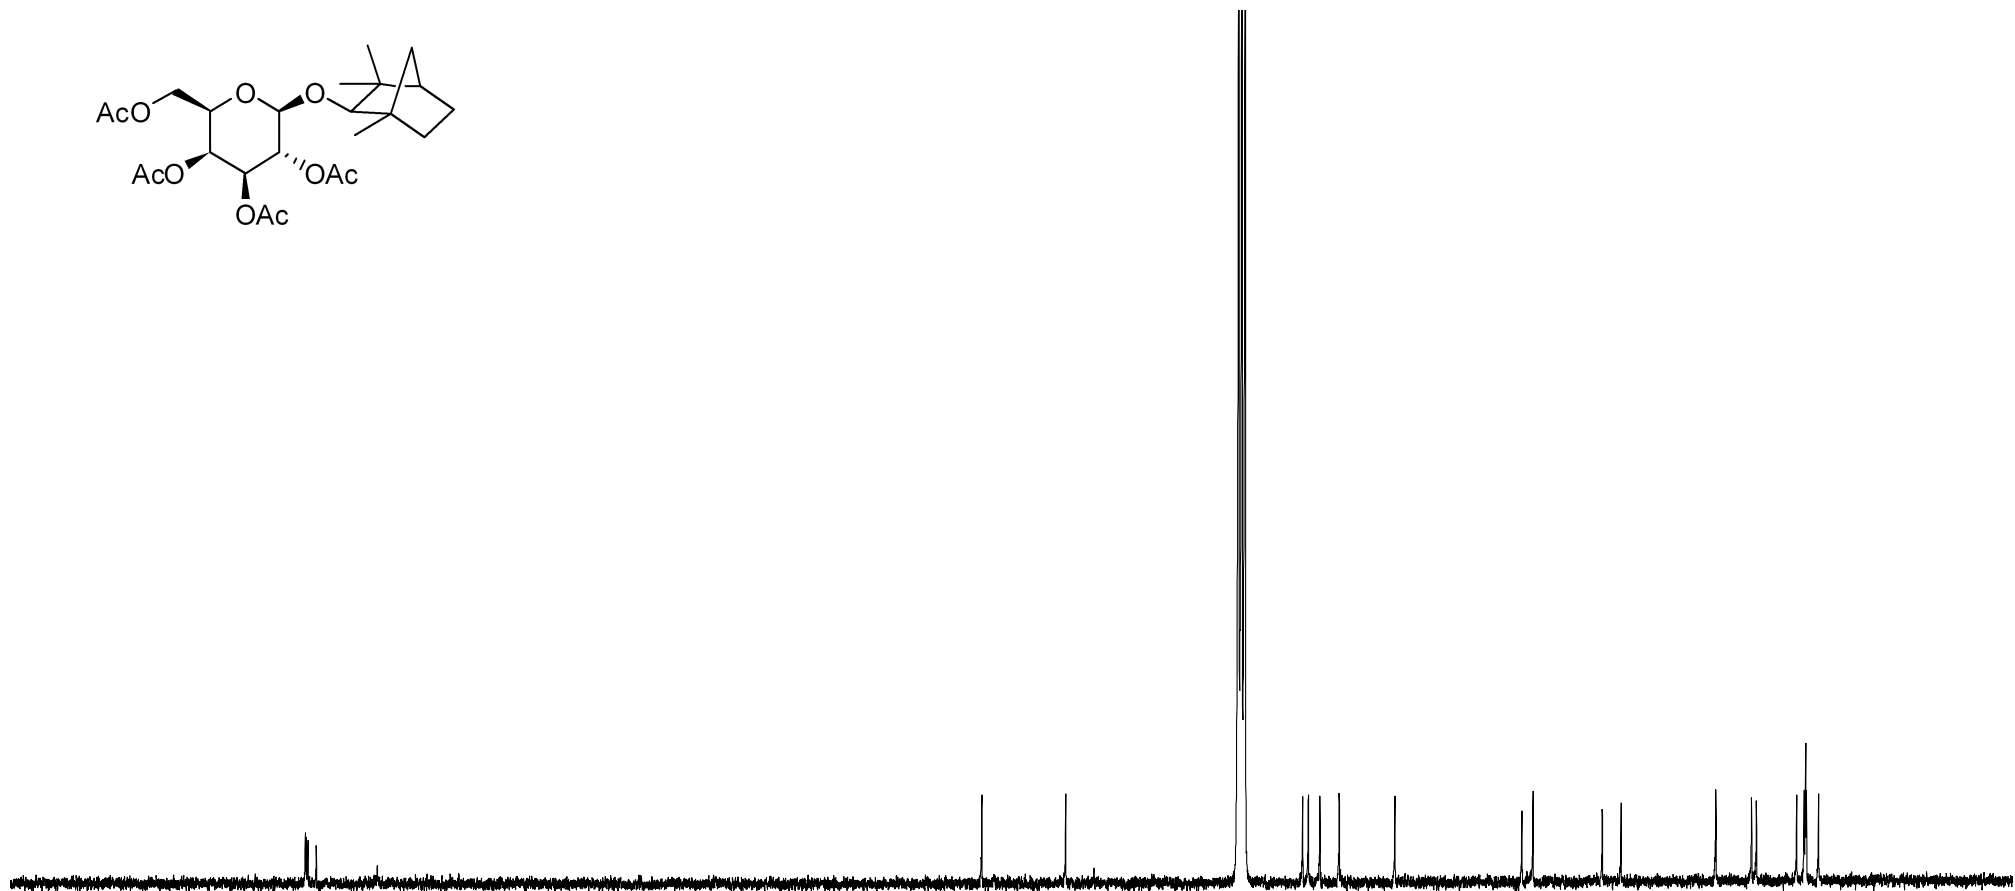

190 180 170 160 150 140 130 120 110 100 90 80 70 60 50 40 30 20 ppm

GBK-760, 1HNMR, AV400MHz, CDCL3

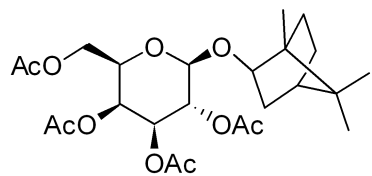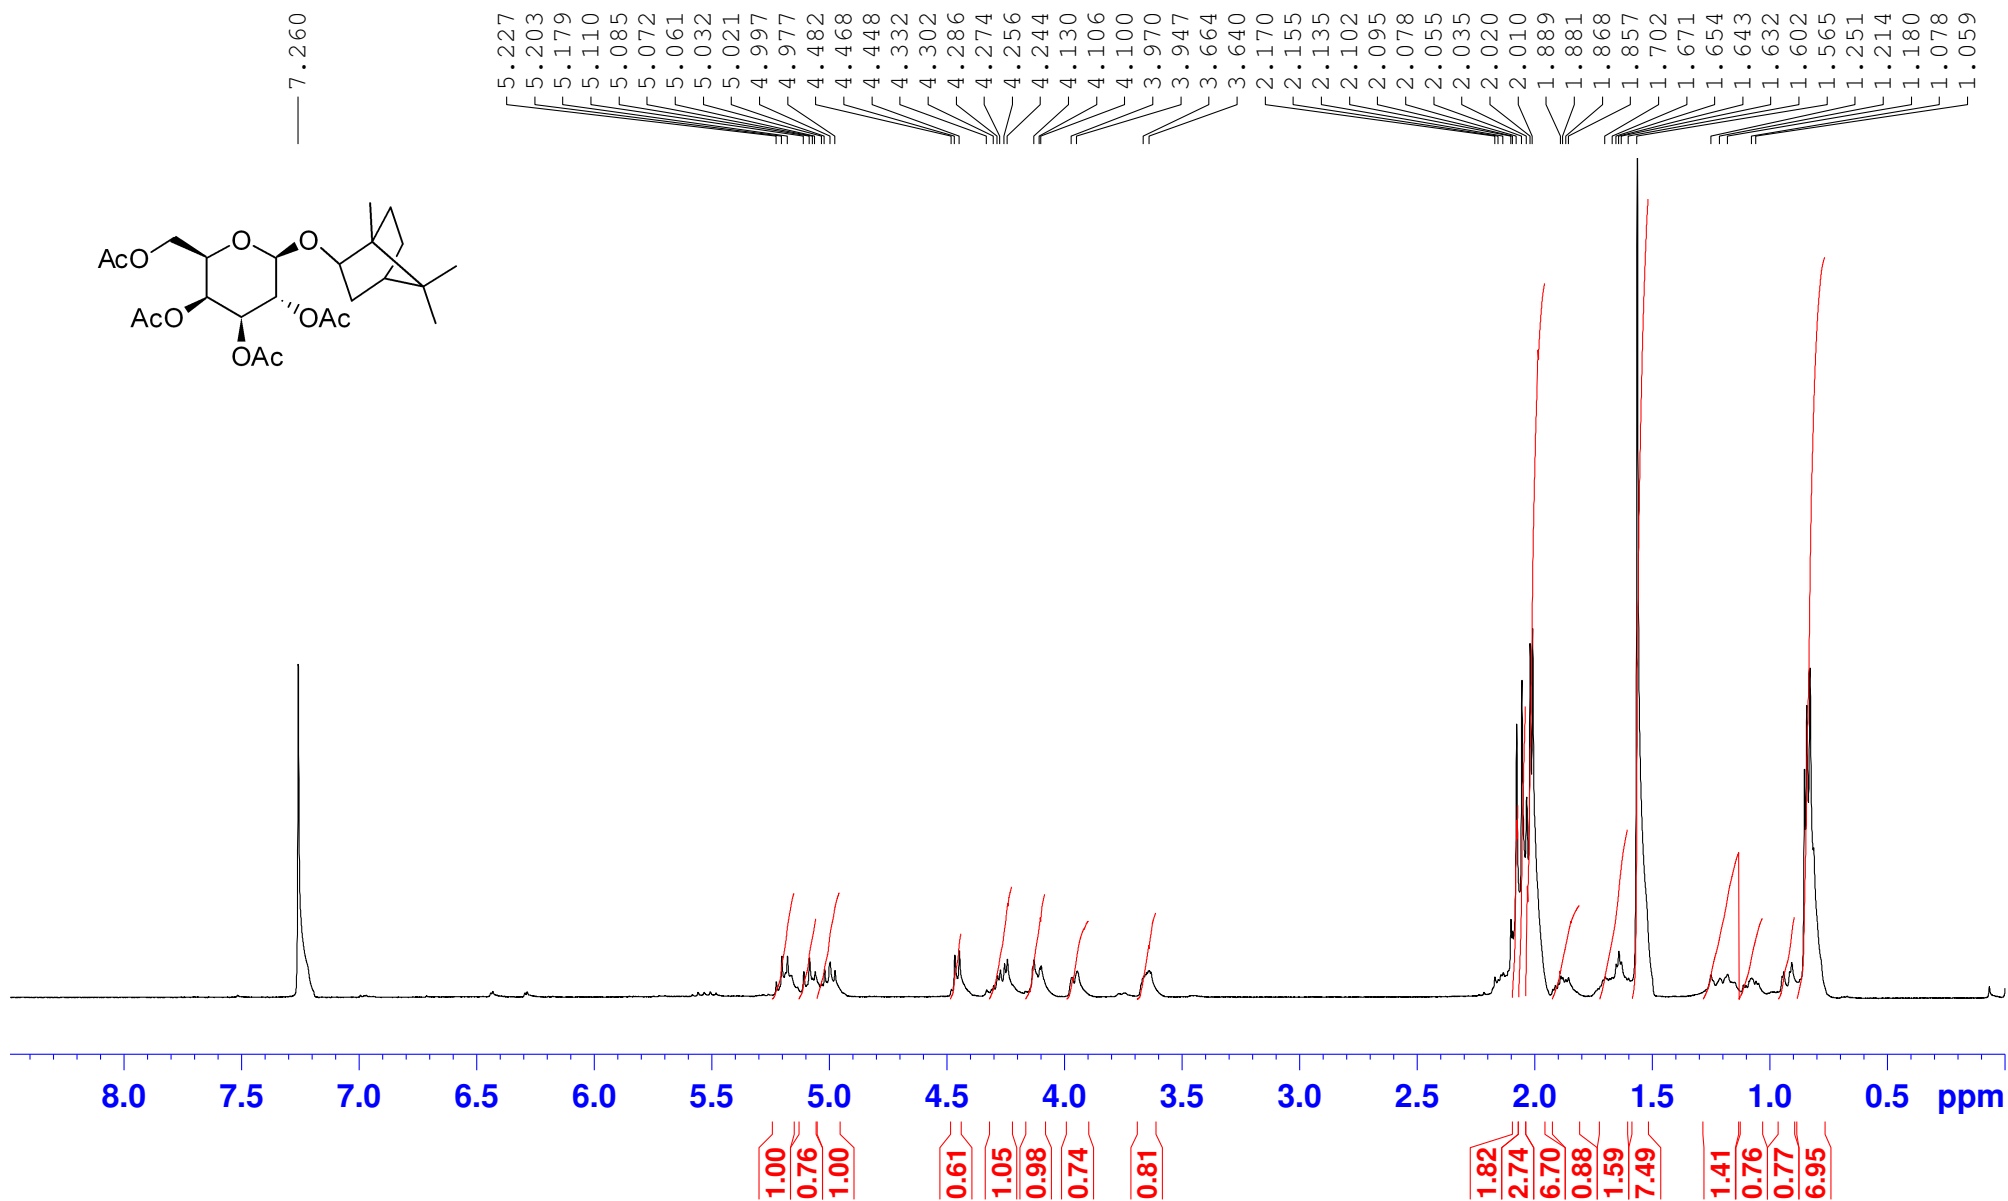

GBK-760-A, <sup>13</sup>C NMR, AV400mHz, CDCl<sub>3</sub>

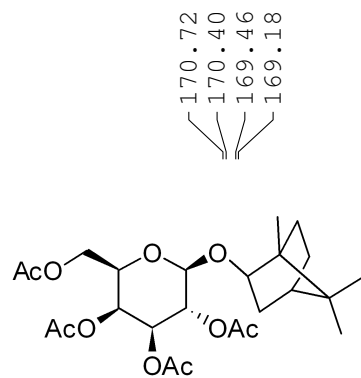

170.72  
170.40  
169.46  
169.18

99.68

84.06

72.84

71.63

71.41

68.80

62.16

49.10

47.98

44.85

36.14

28.35

26.42

20.75

20.67

20.63

19.73

18.87

13.25

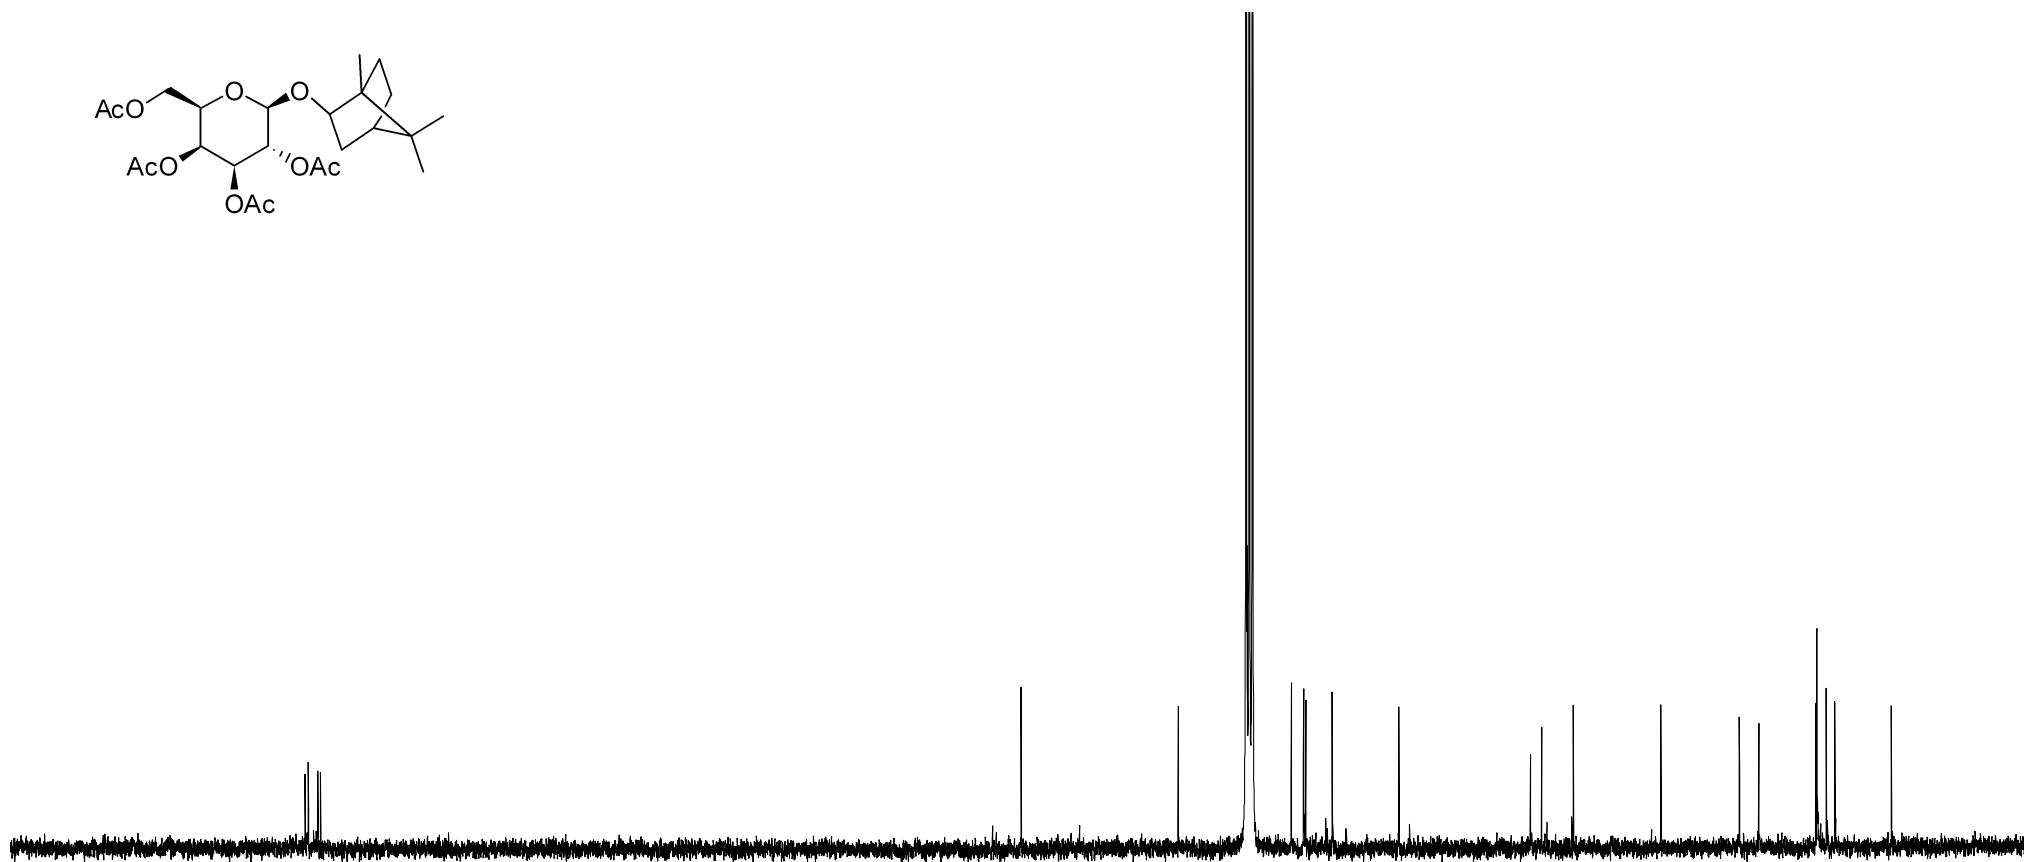

190 180 170 160 150 140 130 120 110 100 90 80 70 60 50 40 30 20 ppm

GBK-759, 1HNMR, AV400mHz, CDCL3

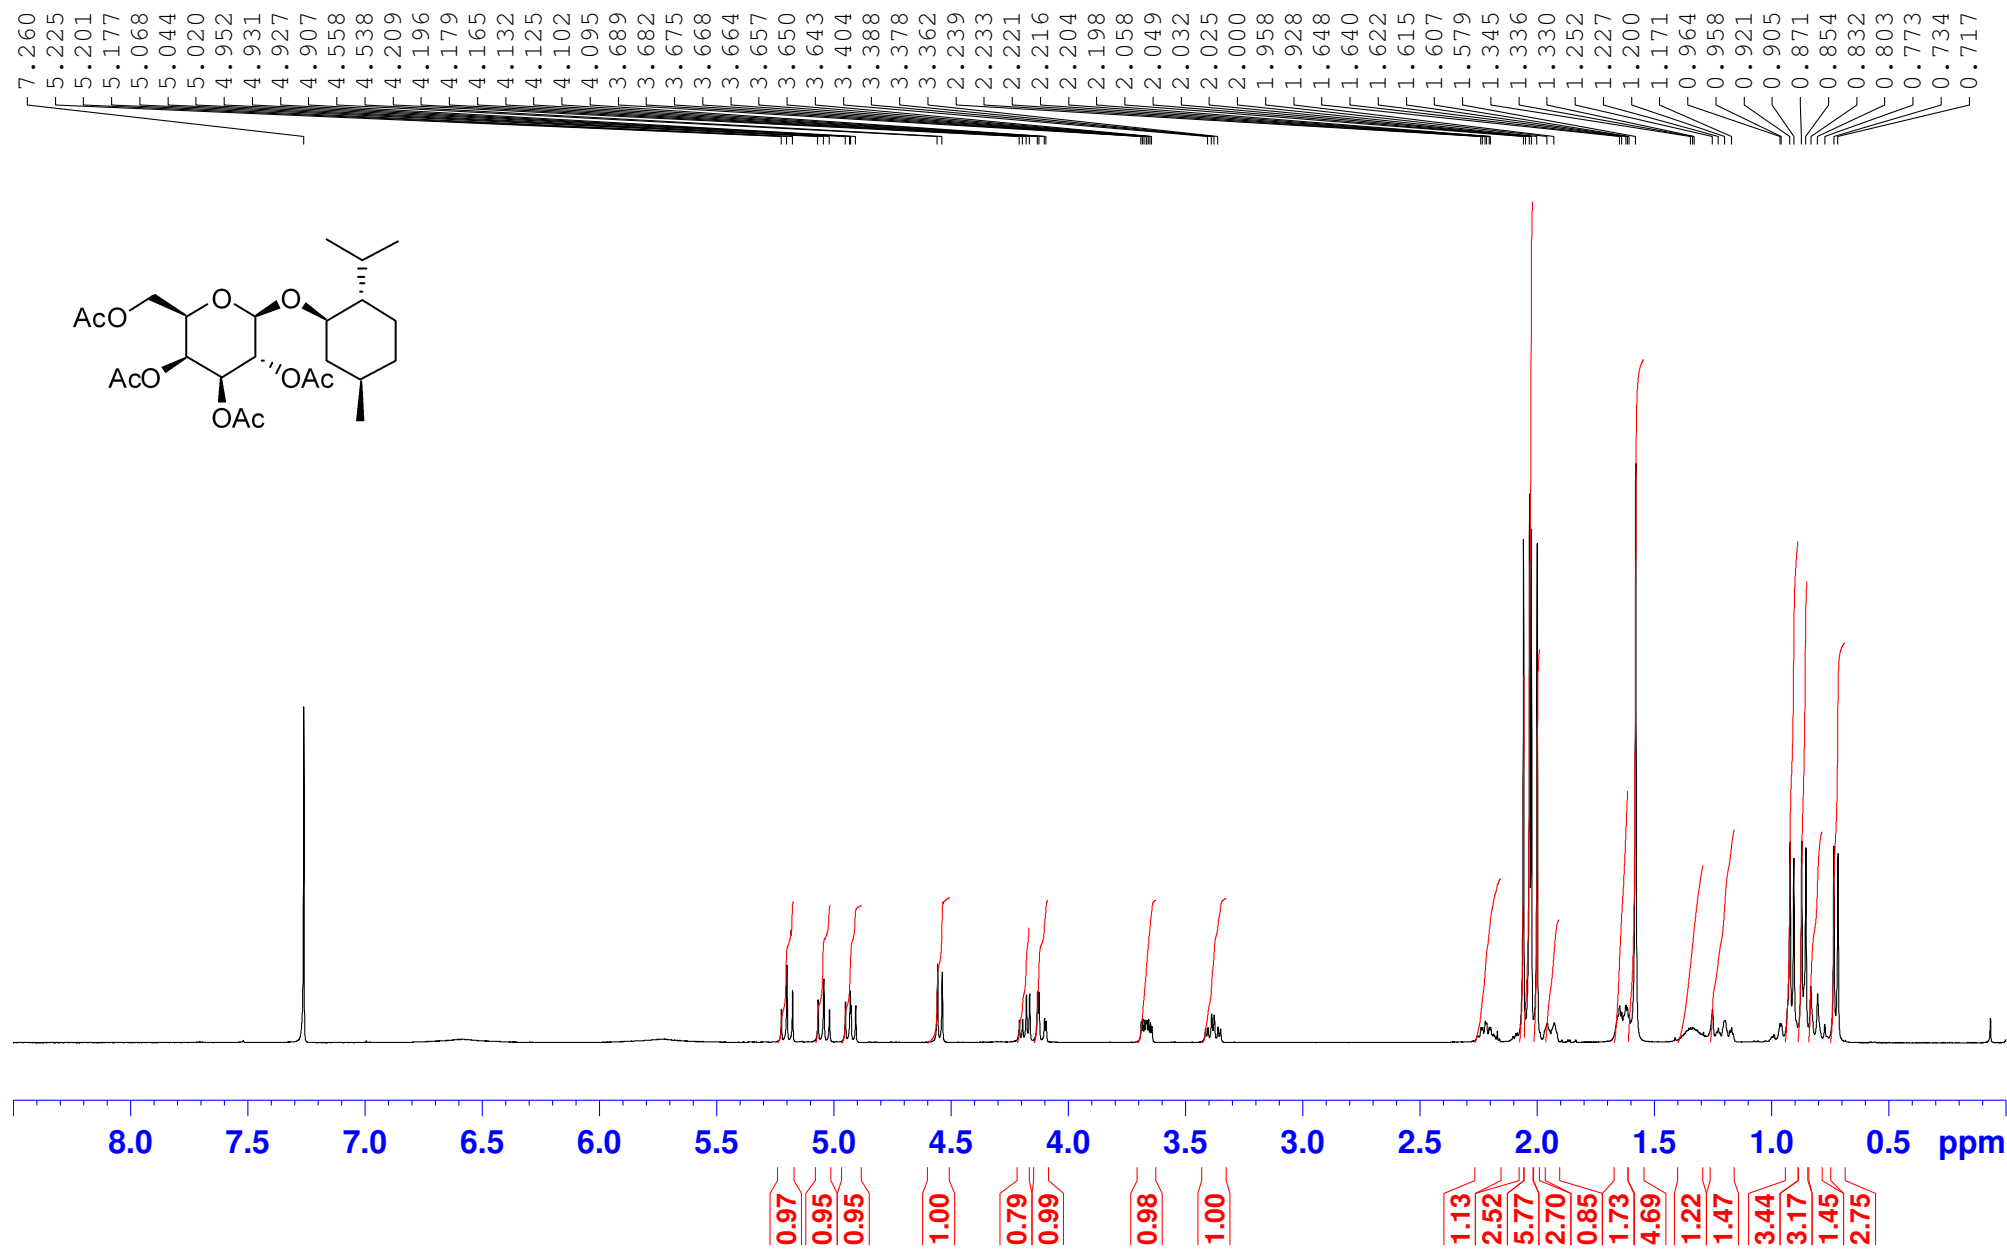

GBK-759, <sup>13</sup>CNMR, AV400mHz, CDCL<sub>3</sub>

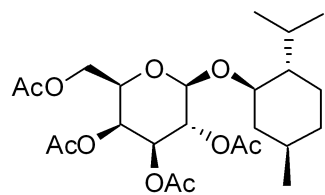

170.70  
170.41  
169.49  
169.34

98.75

79.08  
77.22  
73.06  
71.55  
71.49  
68.93  
62.52

47.43

40.80  
34.20  
31.46  
25.00  
22.97  
22.26  
20.87  
20.73  
20.70  
20.66  
20.64  
15.43

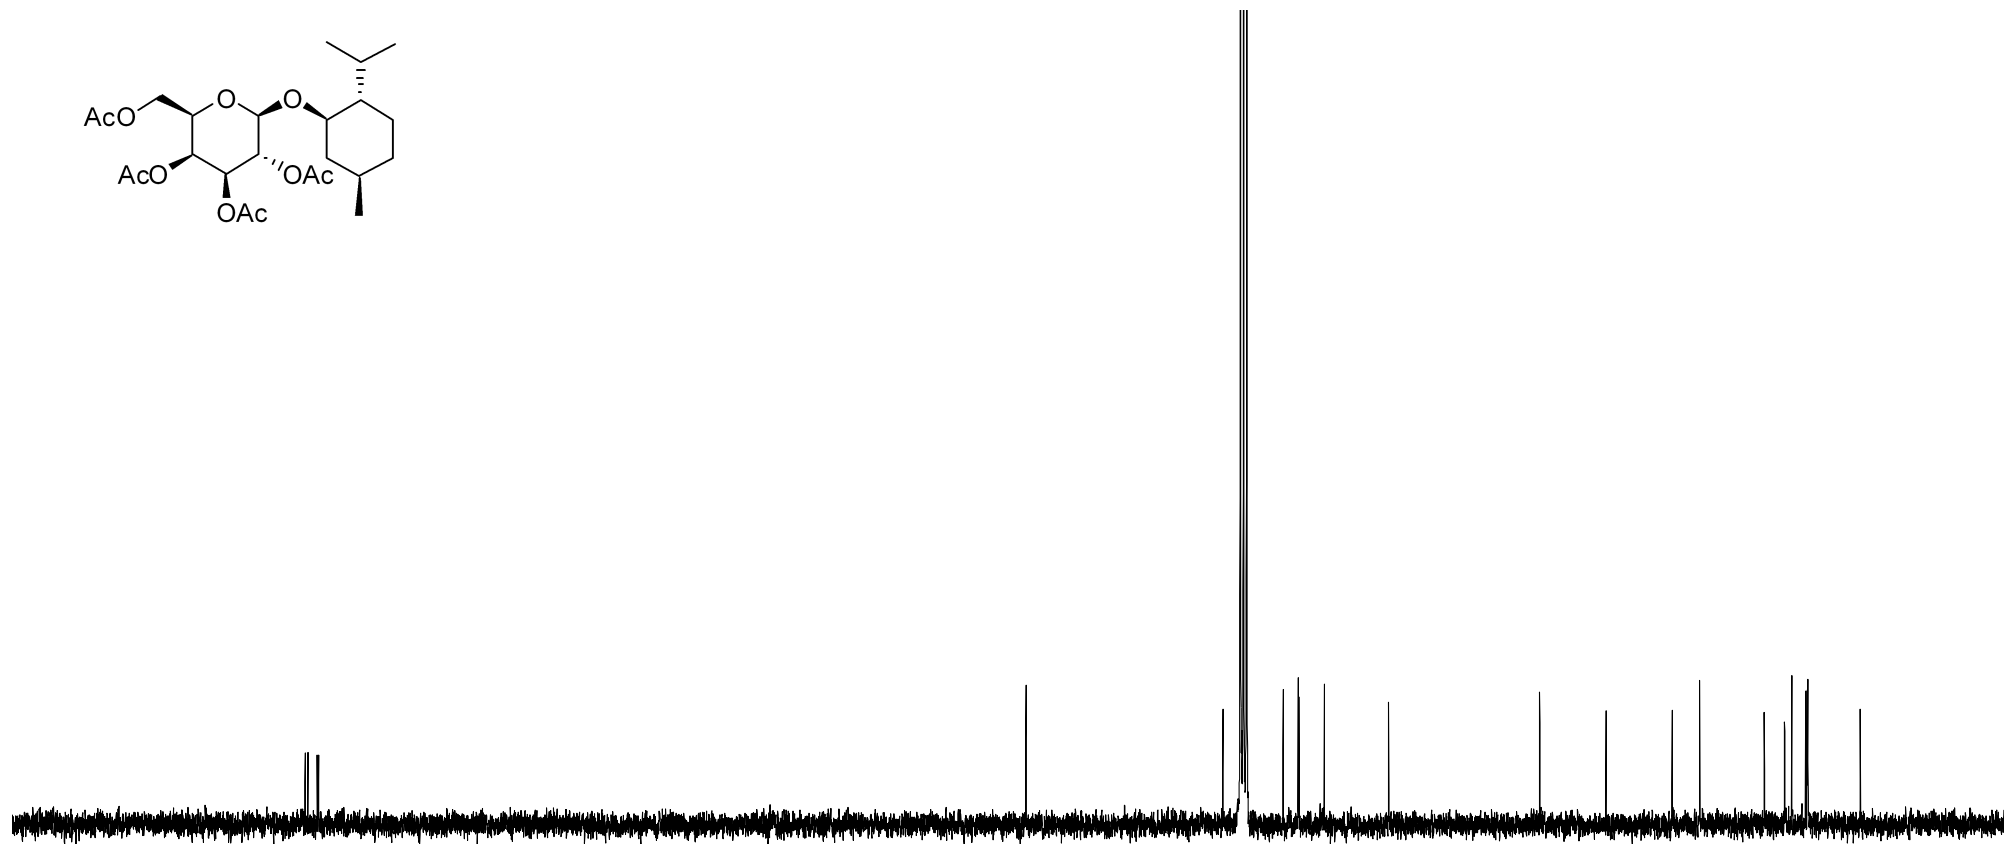

190 180 170 160 150 140 130 120 110 100 90 80 70 60 50 40 30 20 ppm

GBK-Preg, 1H NMR, 400 MHz CDCl3

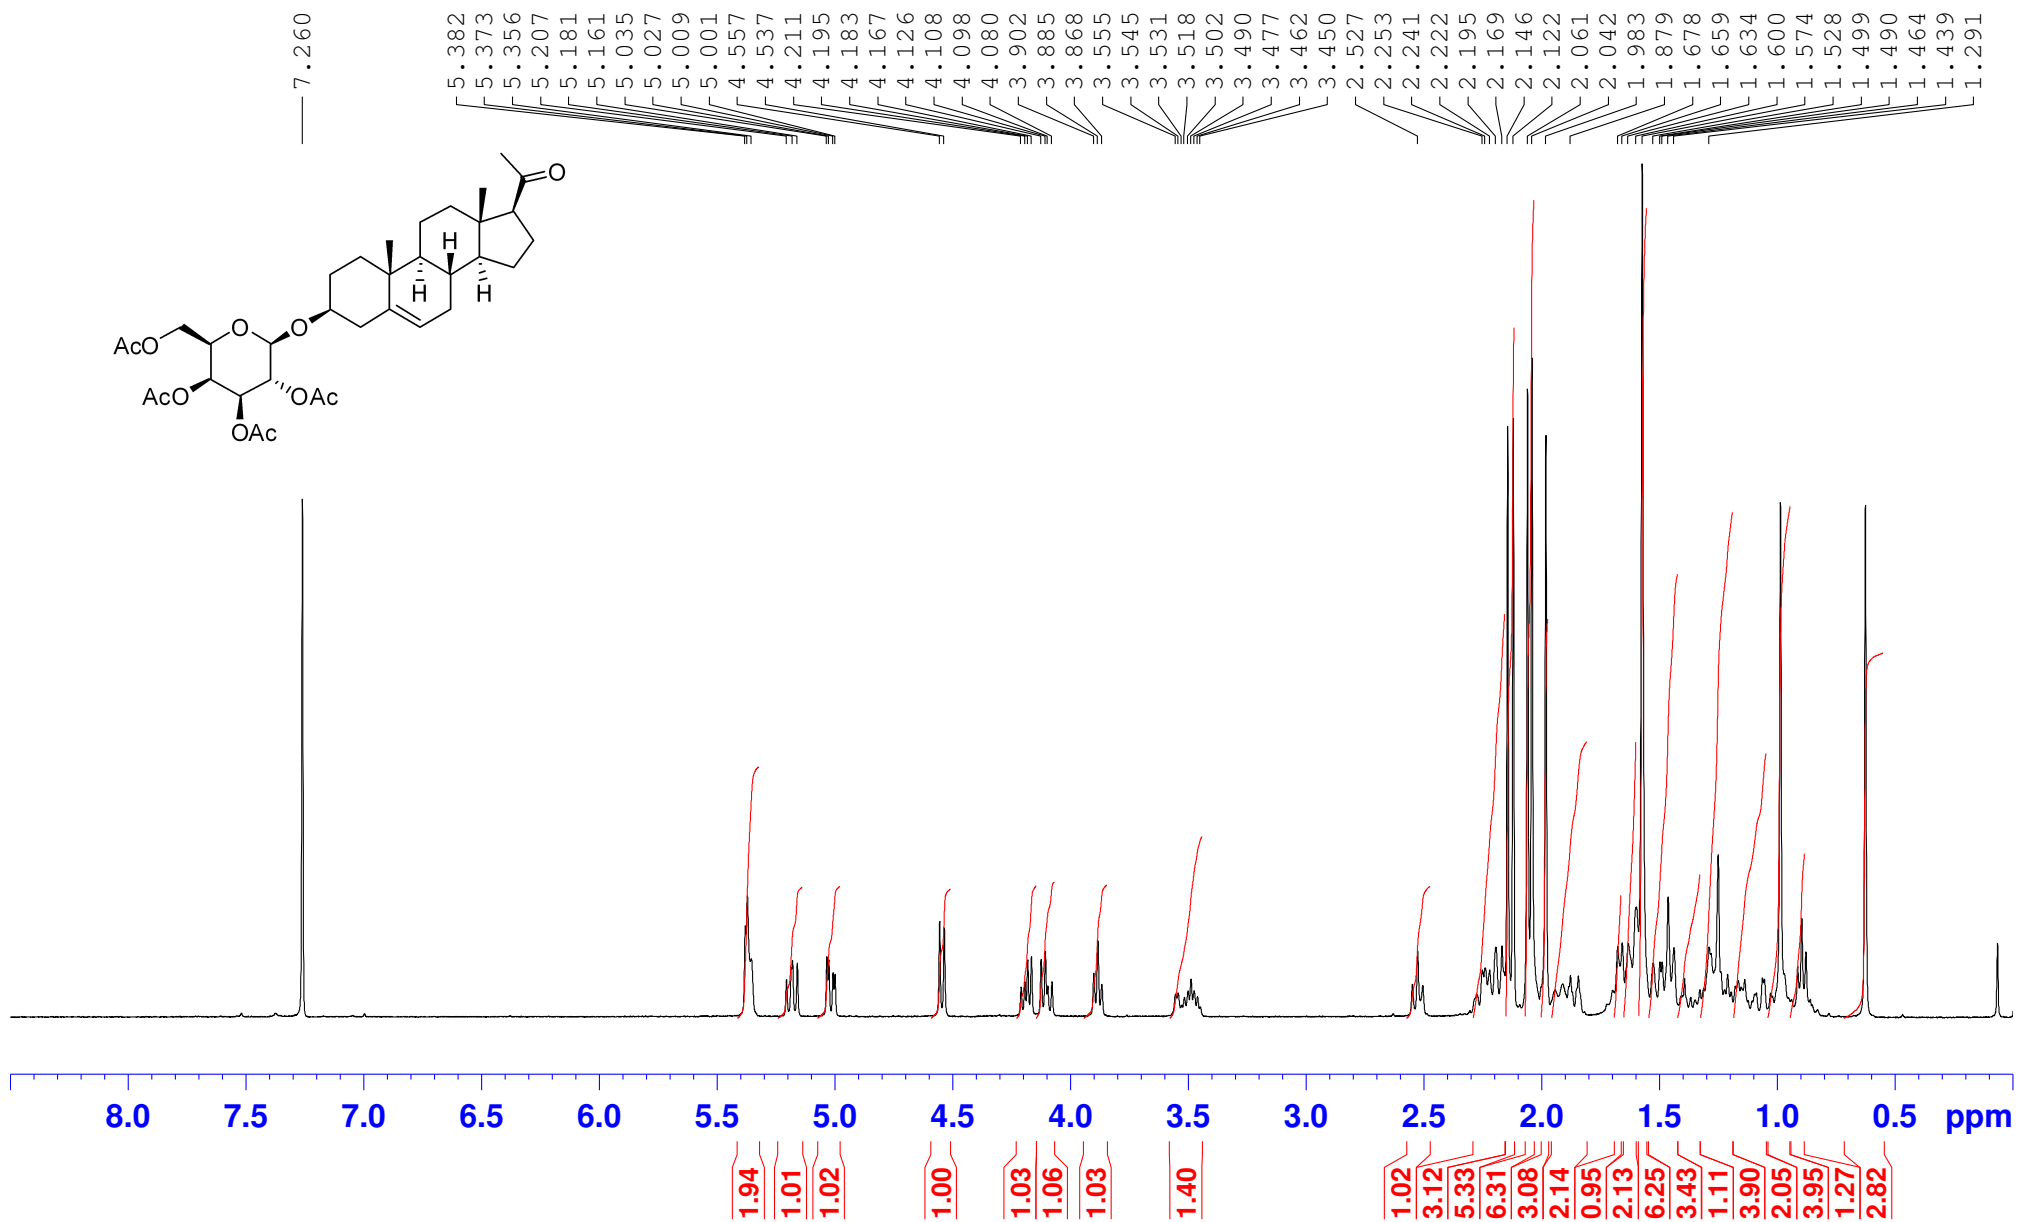

GBK-Preg-Carbon 1 1 D:\spms\cbc\DrLiu\Nov10 GBK

GBK-Preg, 13C NMR, 400 MHz CDCl3

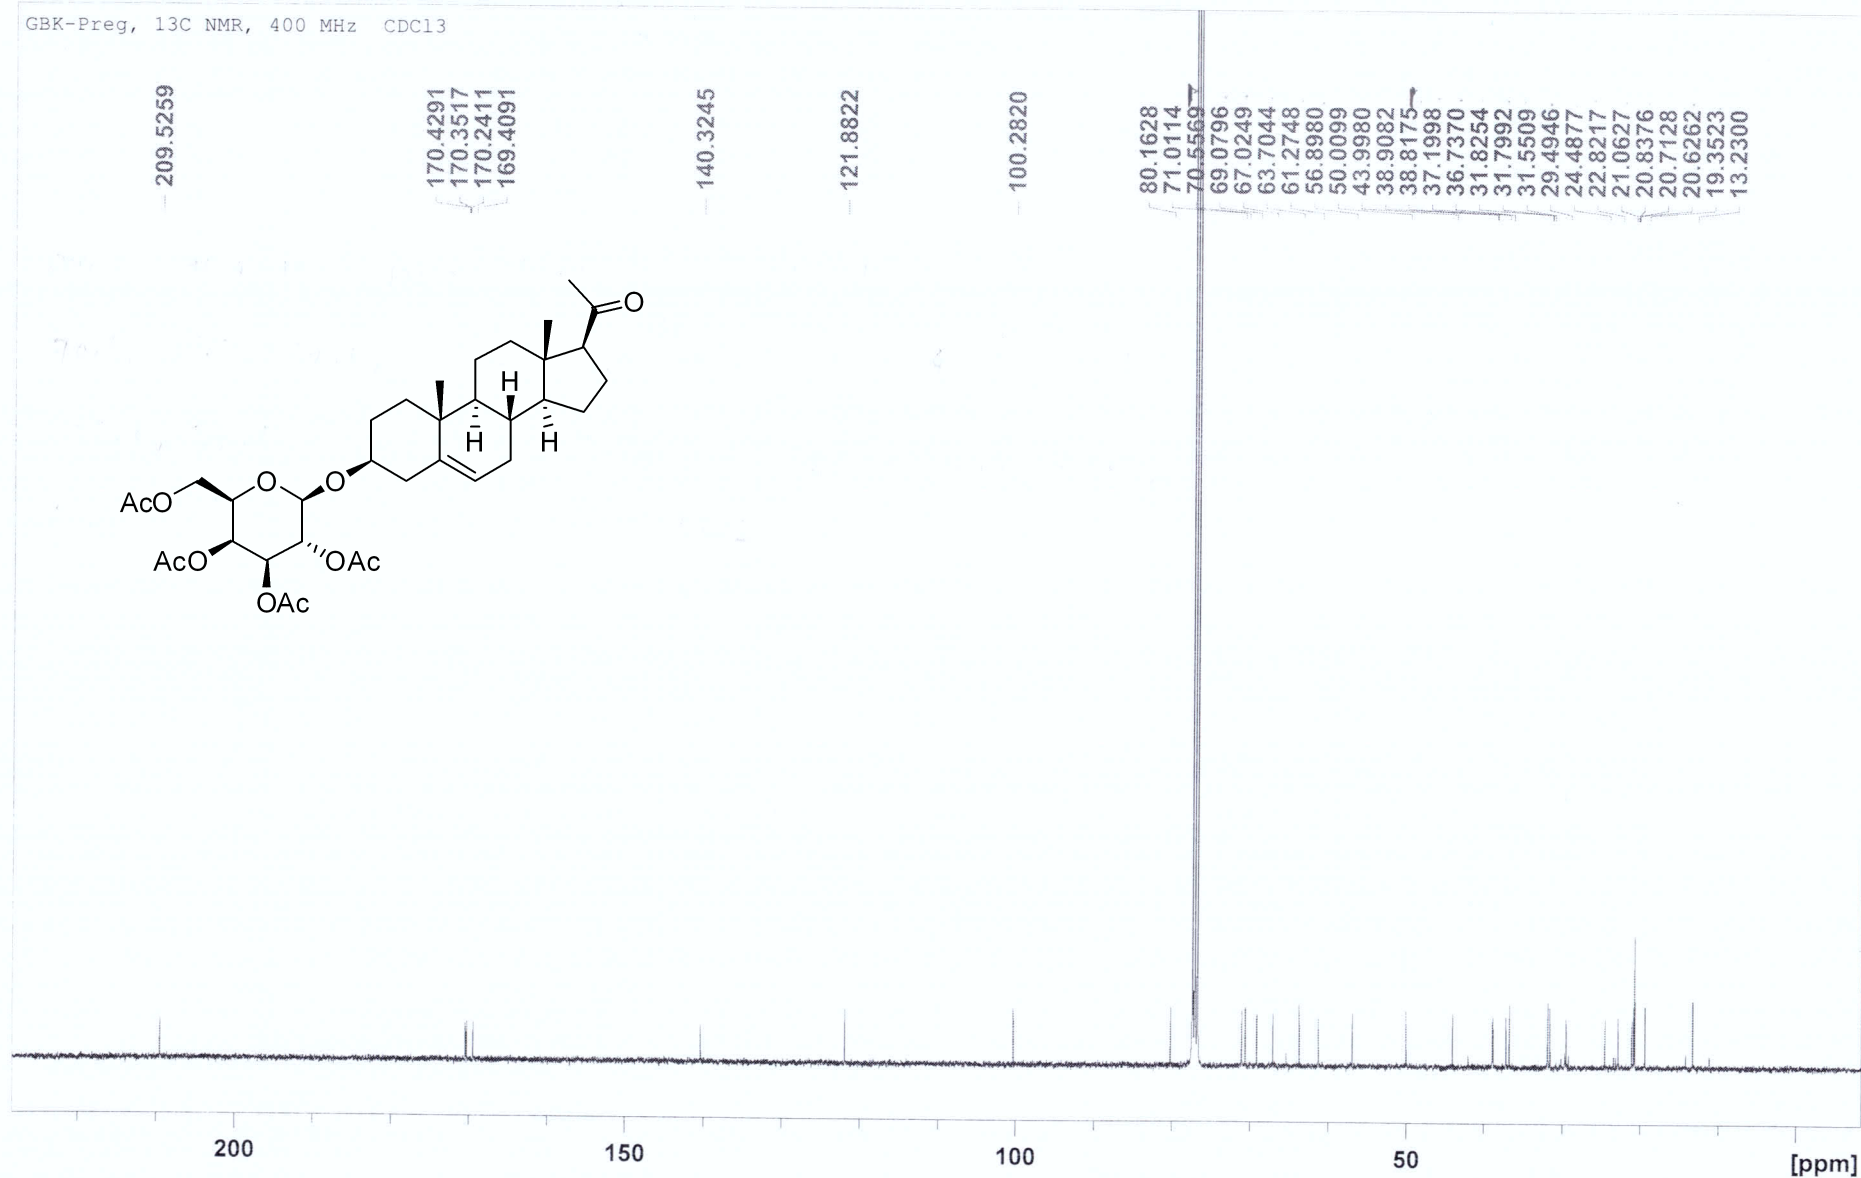

GBK-740, 1NMR AV400 MHz CDCl3

6.710  
5.222  
5.198  
5.174  
5.105  
5.081  
5.072  
5.057  
4.997  
4.977  
4.973  
4.953  
4.492  
4.473  
4.283  
4.271  
4.252  
4.240  
4.149  
4.143  
4.119  
4.113  
3.928  
3.922  
3.914  
3.909  
3.904  
3.706  
3.700  
3.694  
3.688  
3.681  
3.675  
3.669  
3.510  
3.491  
3.486  
2.098  
2.080  
2.046  
2.026  
2.019  
1.999  
1.976  
1.952  
1.929  
1.674  
1.644  
1.630  
1.605  
1.589  
1.531  
1.515  
1.342  
1.326  
1.312  
1.304  
1.294  
1.288  
1.280  
1.155  
0.881  
0.872  
0.865  
0.856

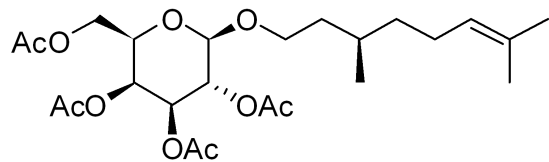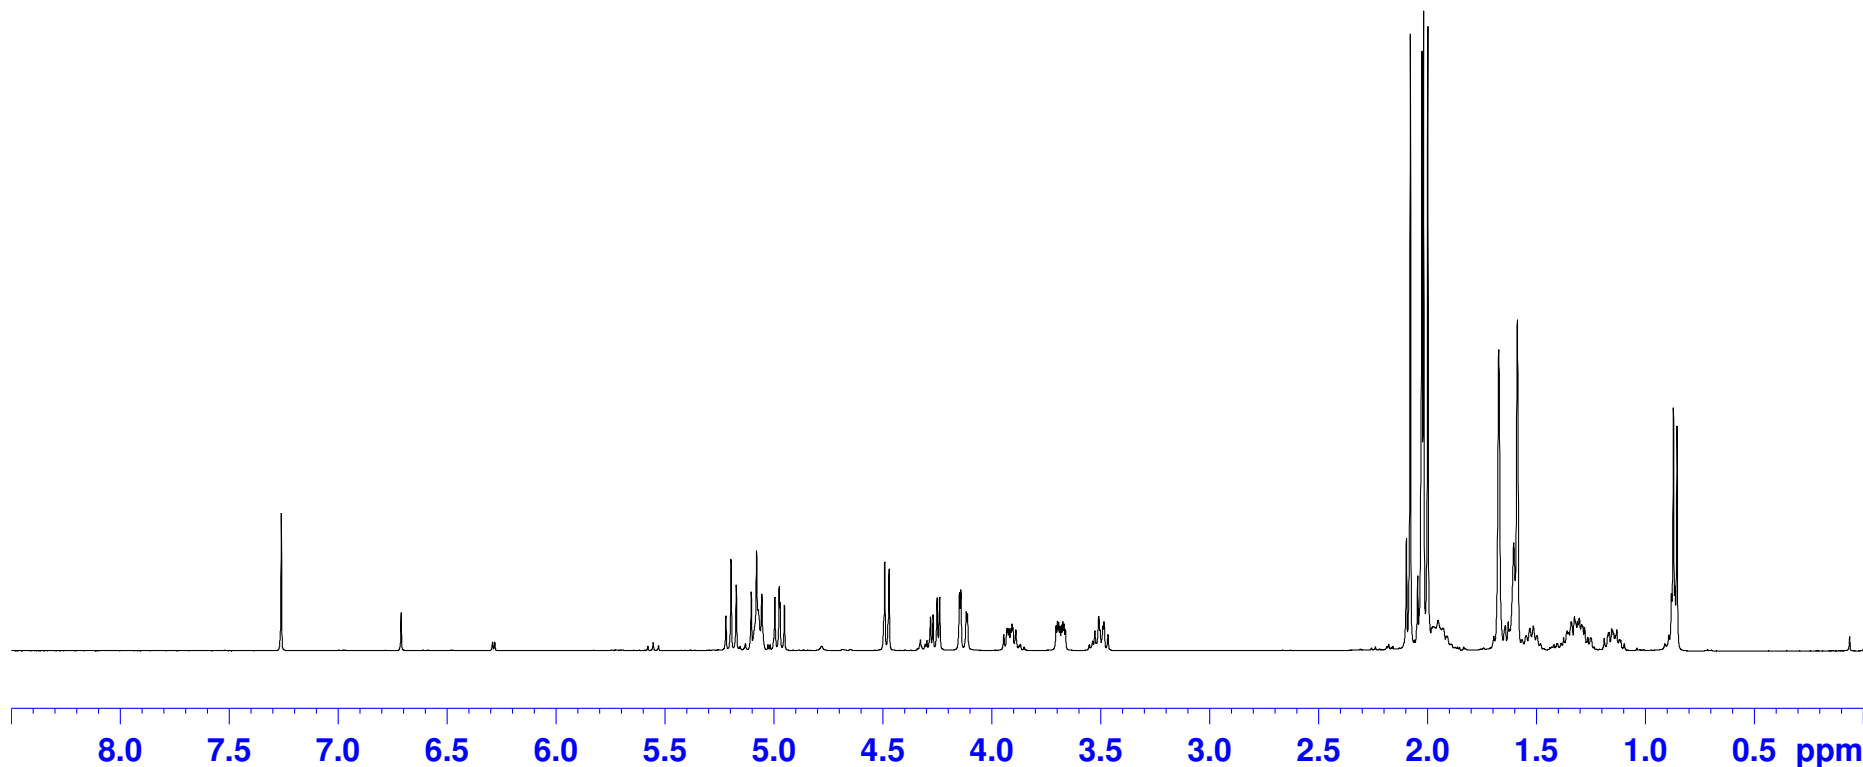

2.17  
4.18  
2.22  
2.18  
1.00  
1.38  
2.47  
2.19  
2.18  
2.23  
7.95  
20.33  
4.24  
7.33  
10.46  
2.34  
5.55  
2.24  
6.91



GBK-740, <sup>13</sup>C NMR AV400 MHz CDCl<sub>3</sub>

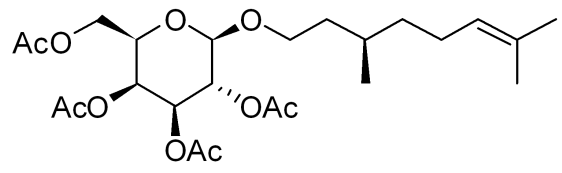

170.74  
170.36  
169.43  
169.27

131.28

124.64

100.96

72.89  
71.75  
71.35  
68.53  
68.48  
62.01

37.17  
36.29  
29.18  
25.71  
25.43  
20.74  
20.64  
20.61  
19.14  
17.64

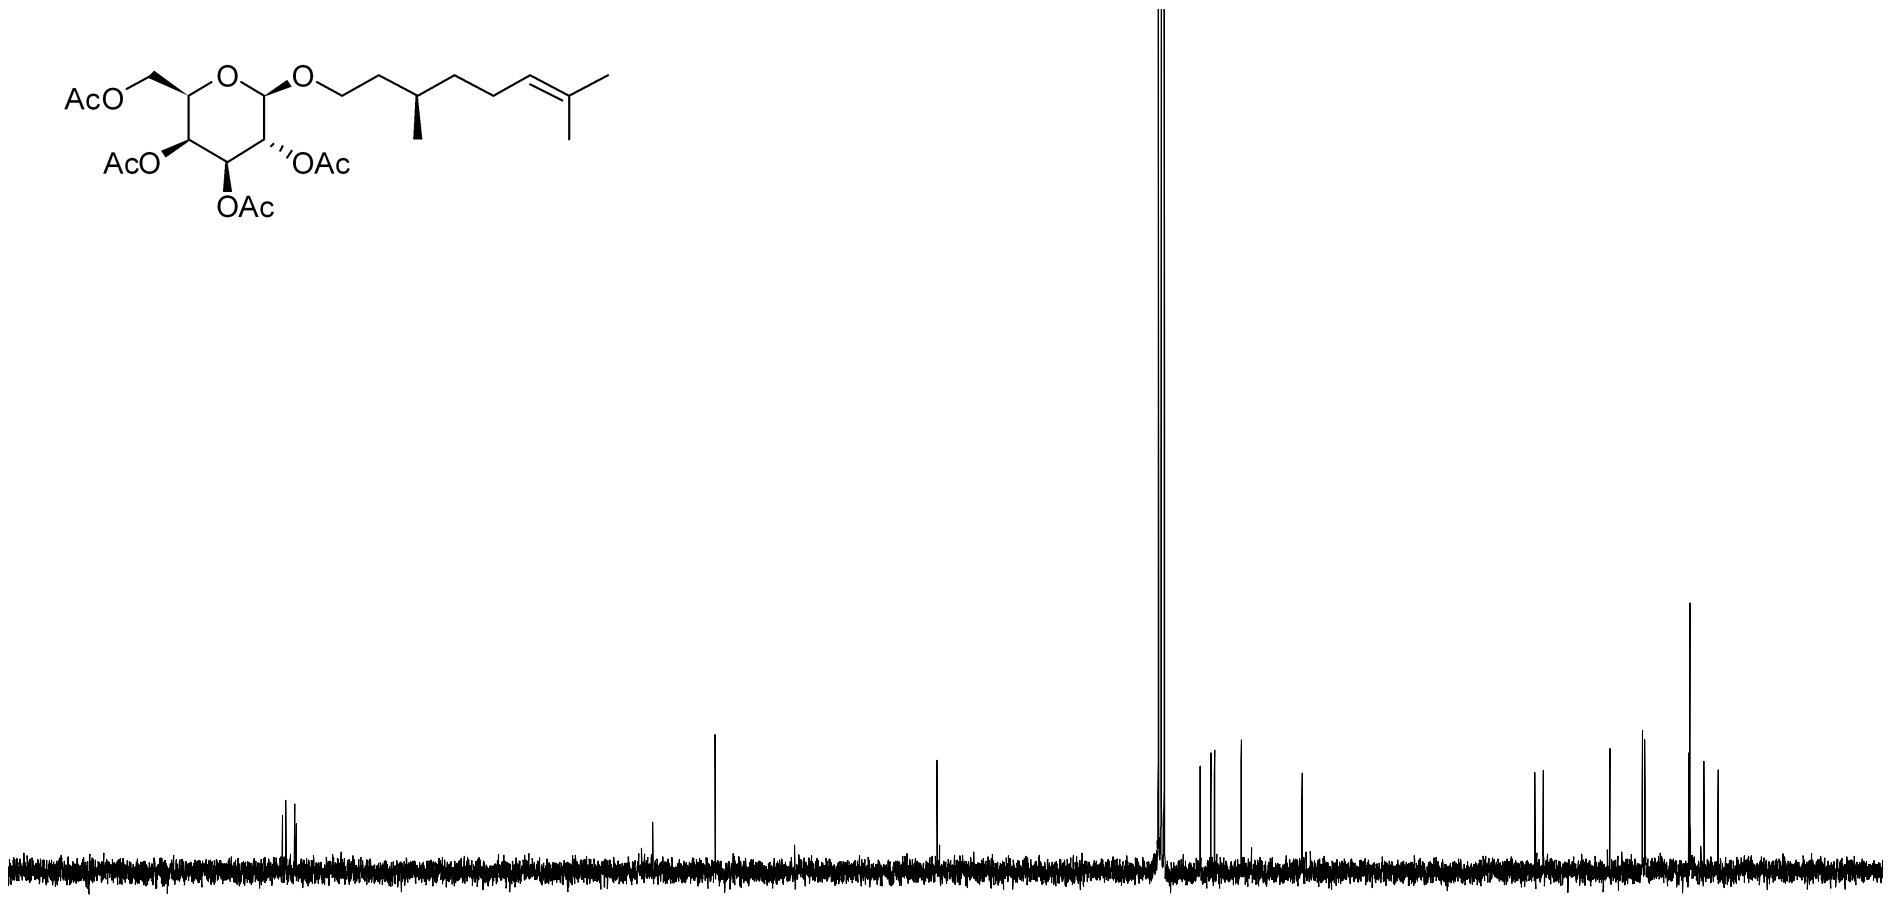

190 180 170 160 150 140 130 120 110 100 90 80 70 60 50 40 30 20 ppm

GBK-766, 1H NMR, 400 MHz CDCl3

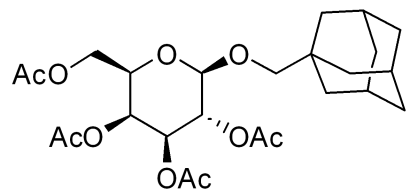

7.260

5.379  
5.371  
5.242  
5.222  
5.217  
5.197  
5.025  
5.016  
4.998  
4.990  
4.388  
4.368  
4.172  
4.157  
4.141  
4.123  
3.885  
3.869  
3.852  
3.519  
3.495  
2.986  
2.962  
2.183  
2.159  
2.143  
2.056  
2.043  
1.982  
1.949  
1.723  
1.693  
1.630  
1.615  
1.601  
1.492

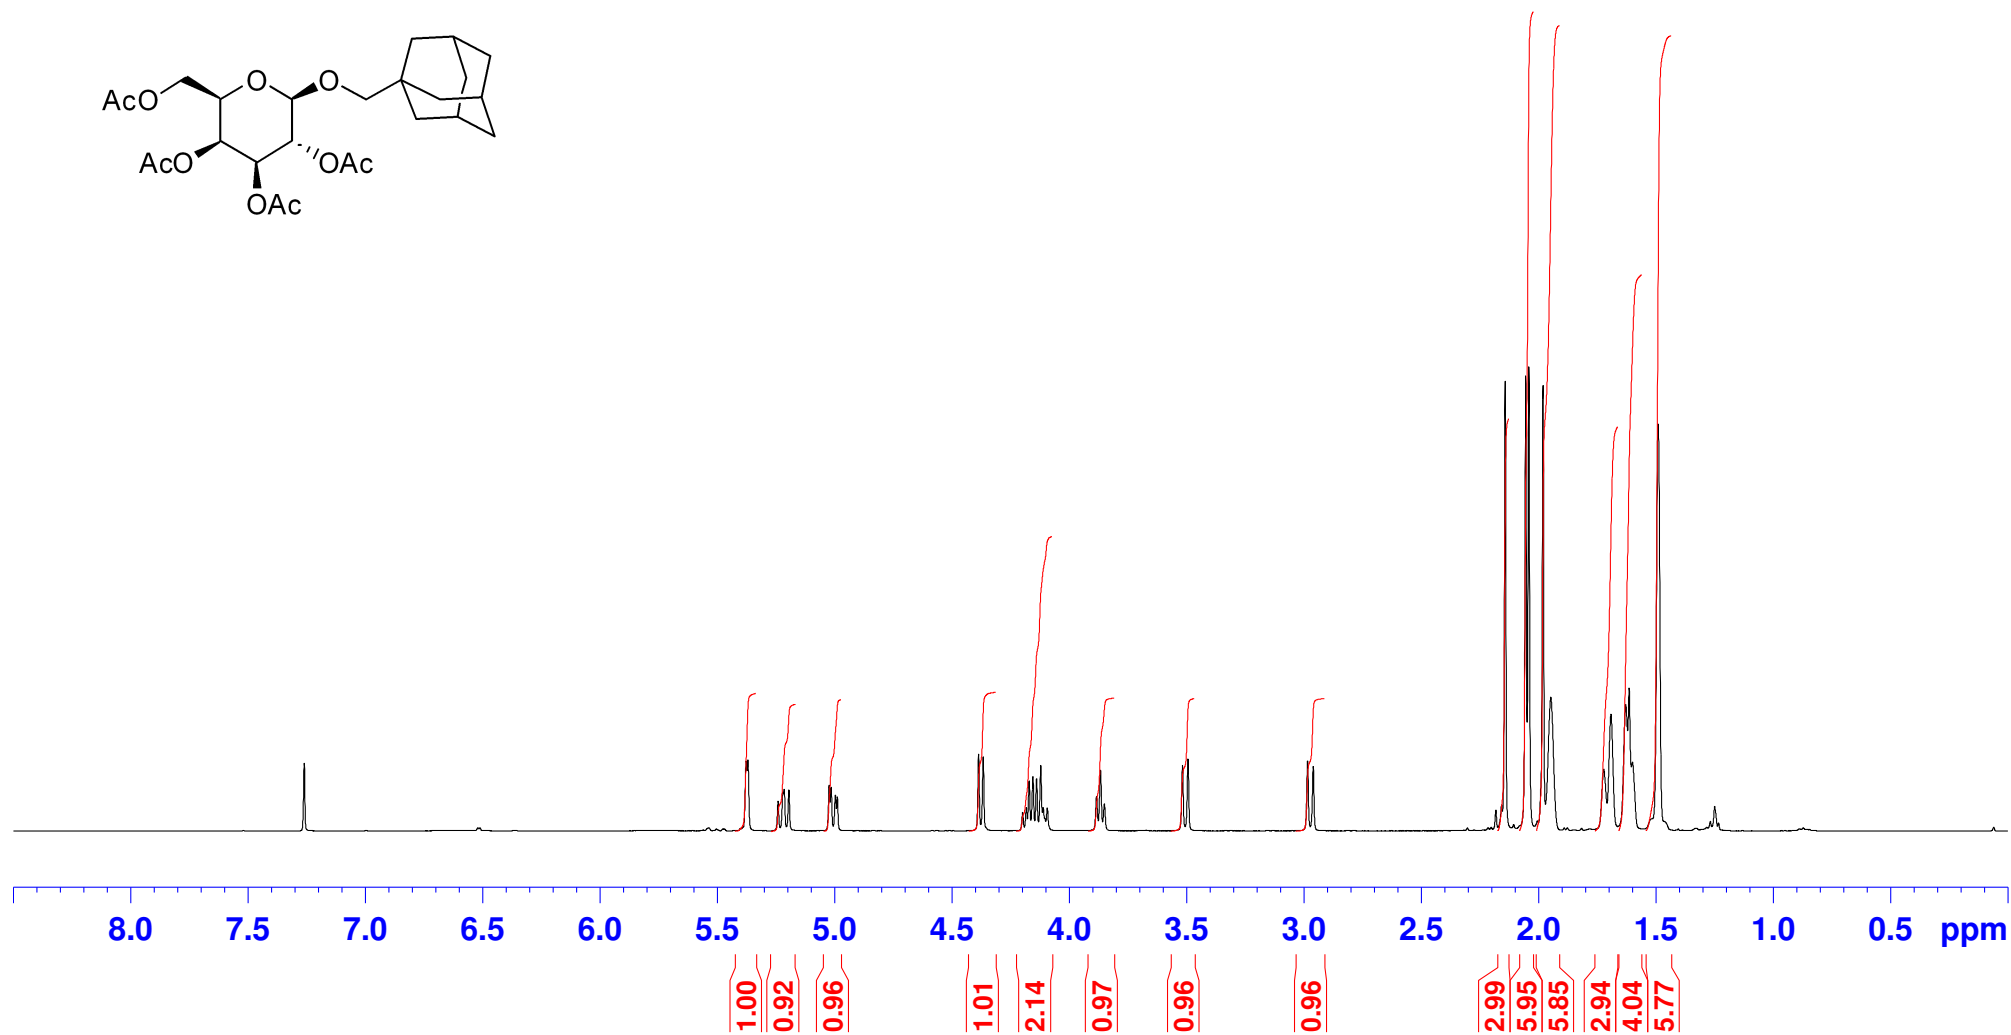

GBK-766, <sup>13</sup>C NMR, 400 MHz CDCl<sub>3</sub>

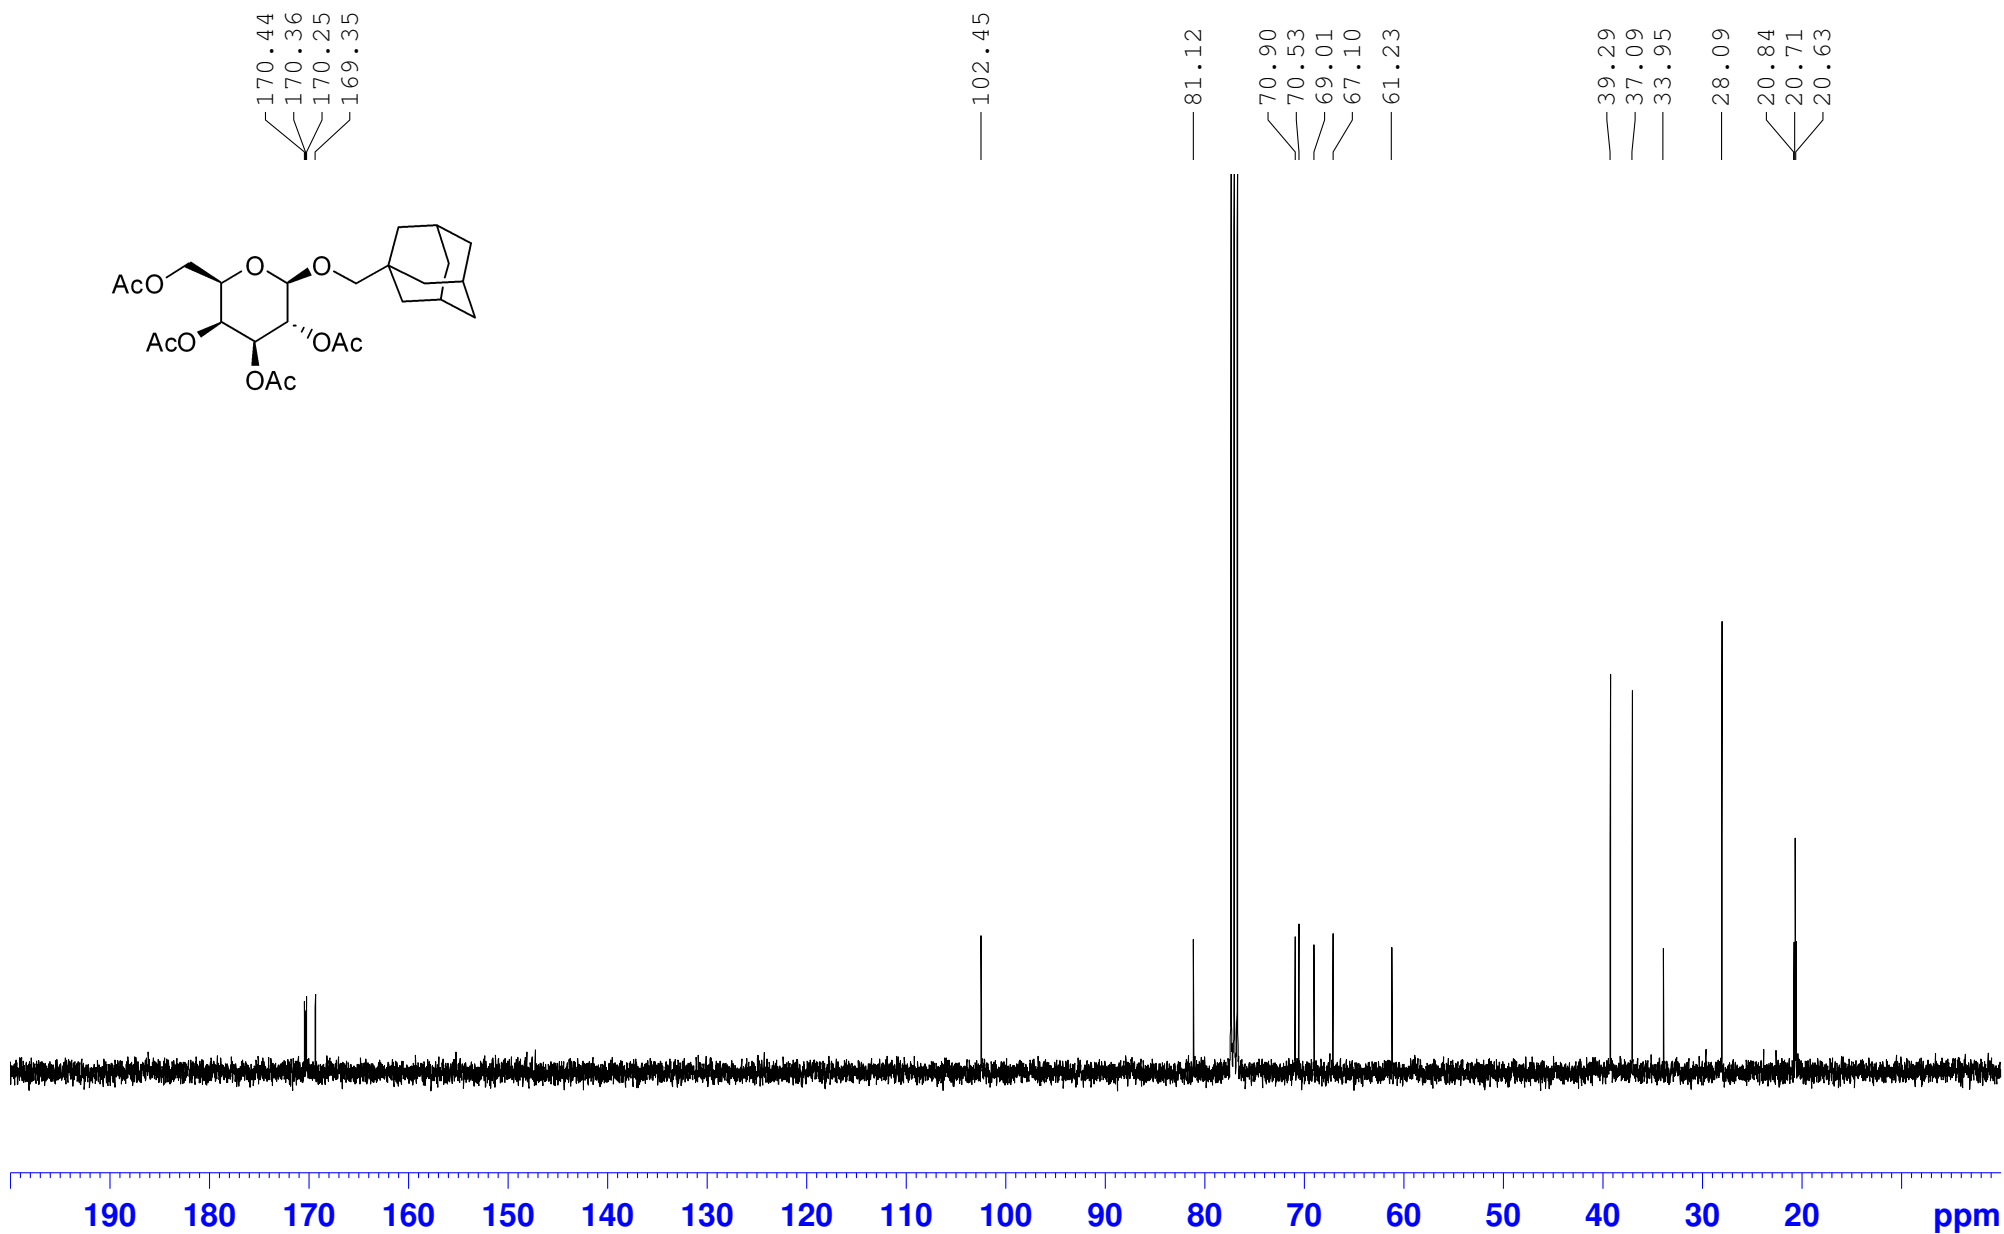

GBK-767, <sup>1</sup>H NMR, 400 MHz CDCl<sub>3</sub>

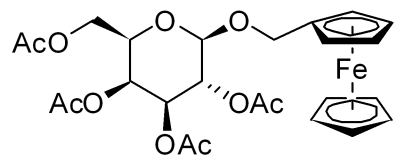

7.259

5.364  
5.201  
5.176  
5.156  
4.987  
4.979  
4.961  
4.953  
4.653  
4.624  
4.509  
4.489  
4.430  
4.401  
4.200  
4.187  
4.159  
4.136  
4.111  
3.867

2.144  
2.071  
1.959  
1.952

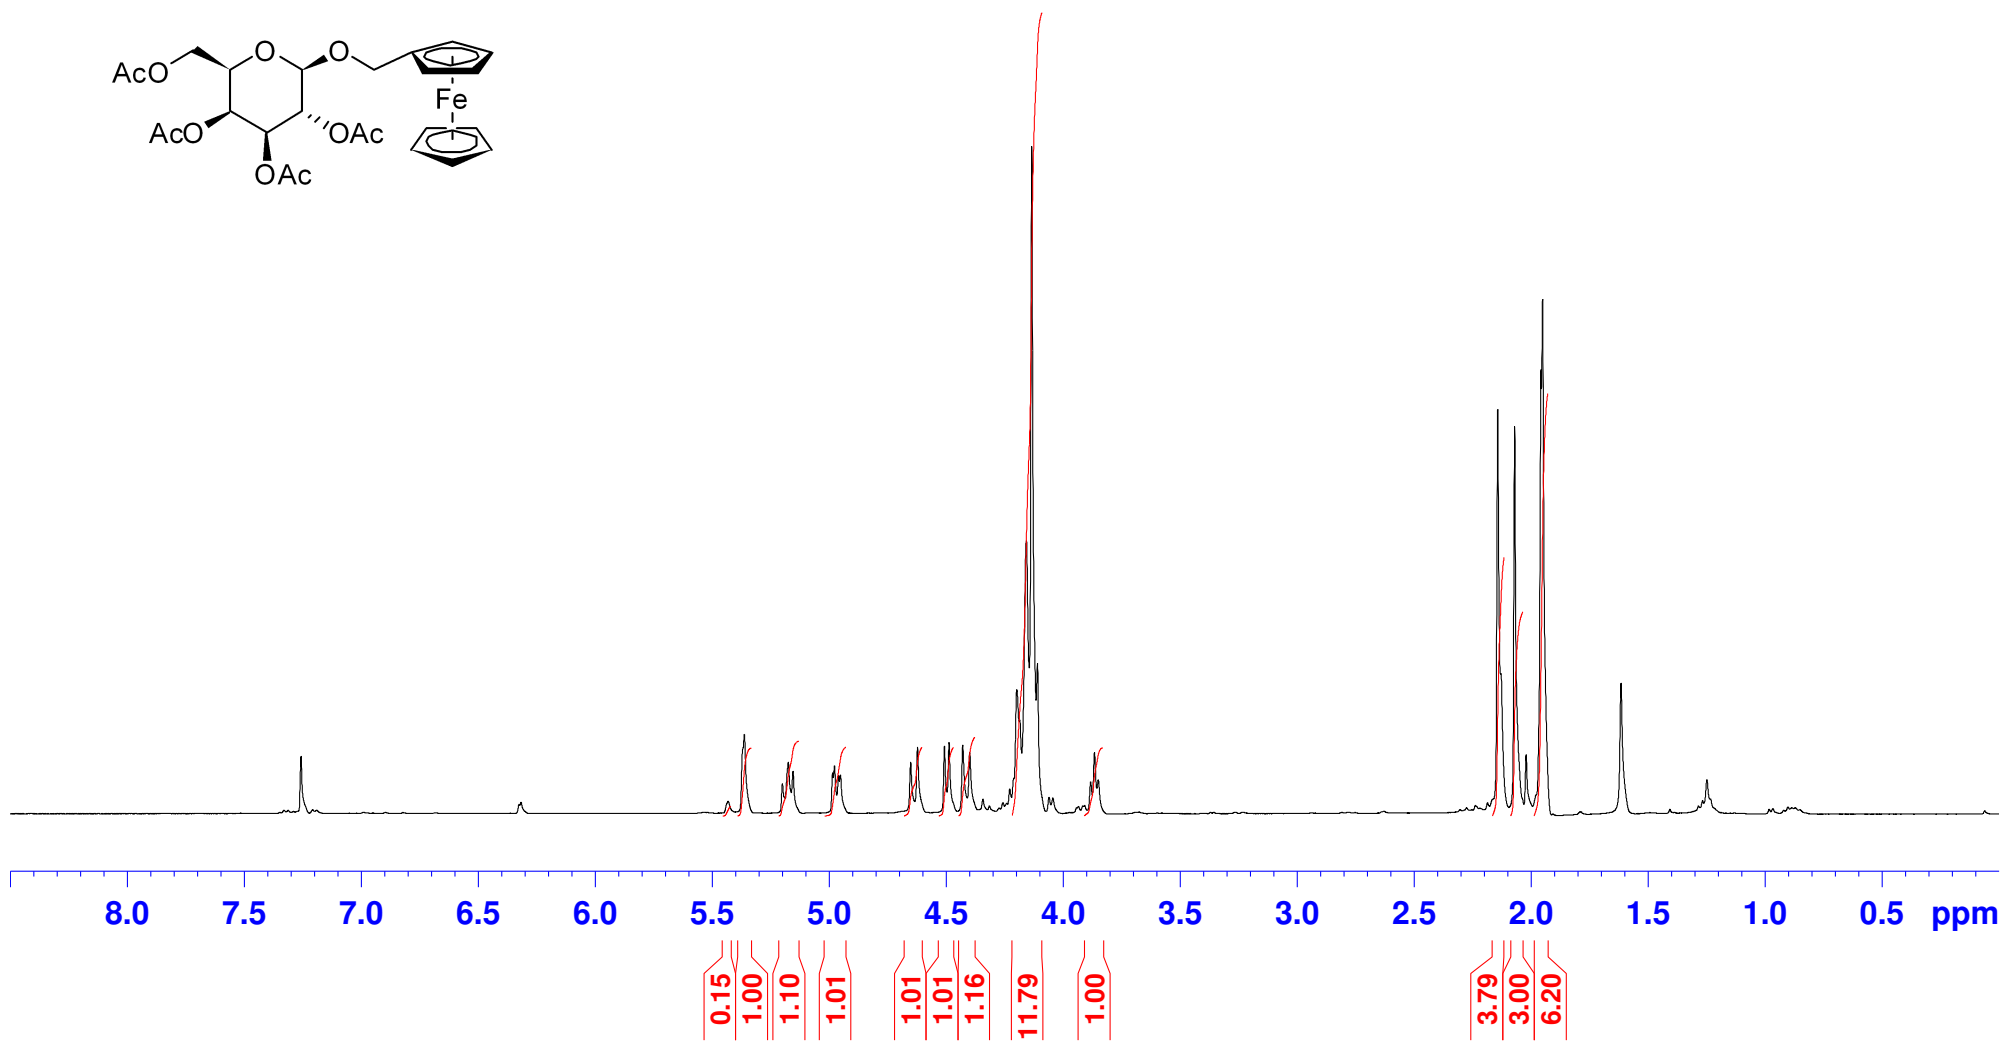

GBK-767, <sup>13</sup>C NMR, 400 MHz CDCl<sub>3</sub>

170.43  
170.32  
170.18  
169.44

99.42

81.96  
70.97  
70.60  
69.33  
69.01  
68.91  
68.80  
68.57  
68.51  
68.47  
67.43  
67.08  
61.34

20.80  
20.74  
20.70  
20.59

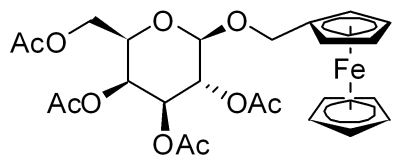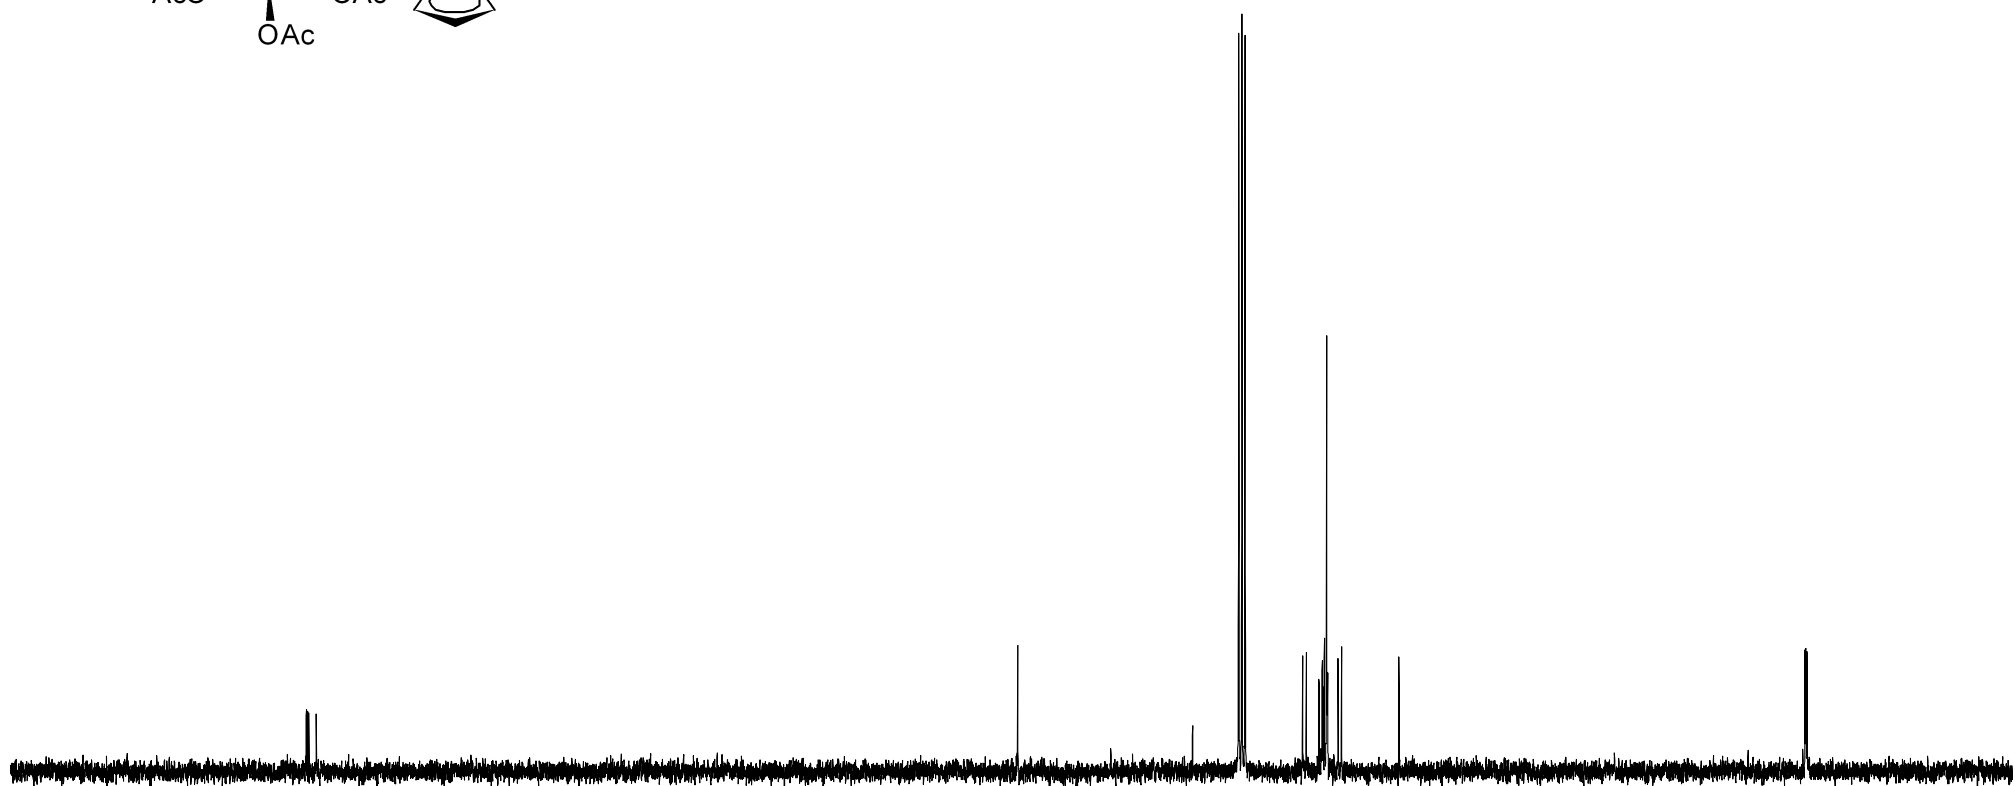

190 180 170 160 150 140 130 120 110 100 90 80 70 60 50 40 30 20 ppm

GBK-768, 1H NMR, 400 MHz CDCl3

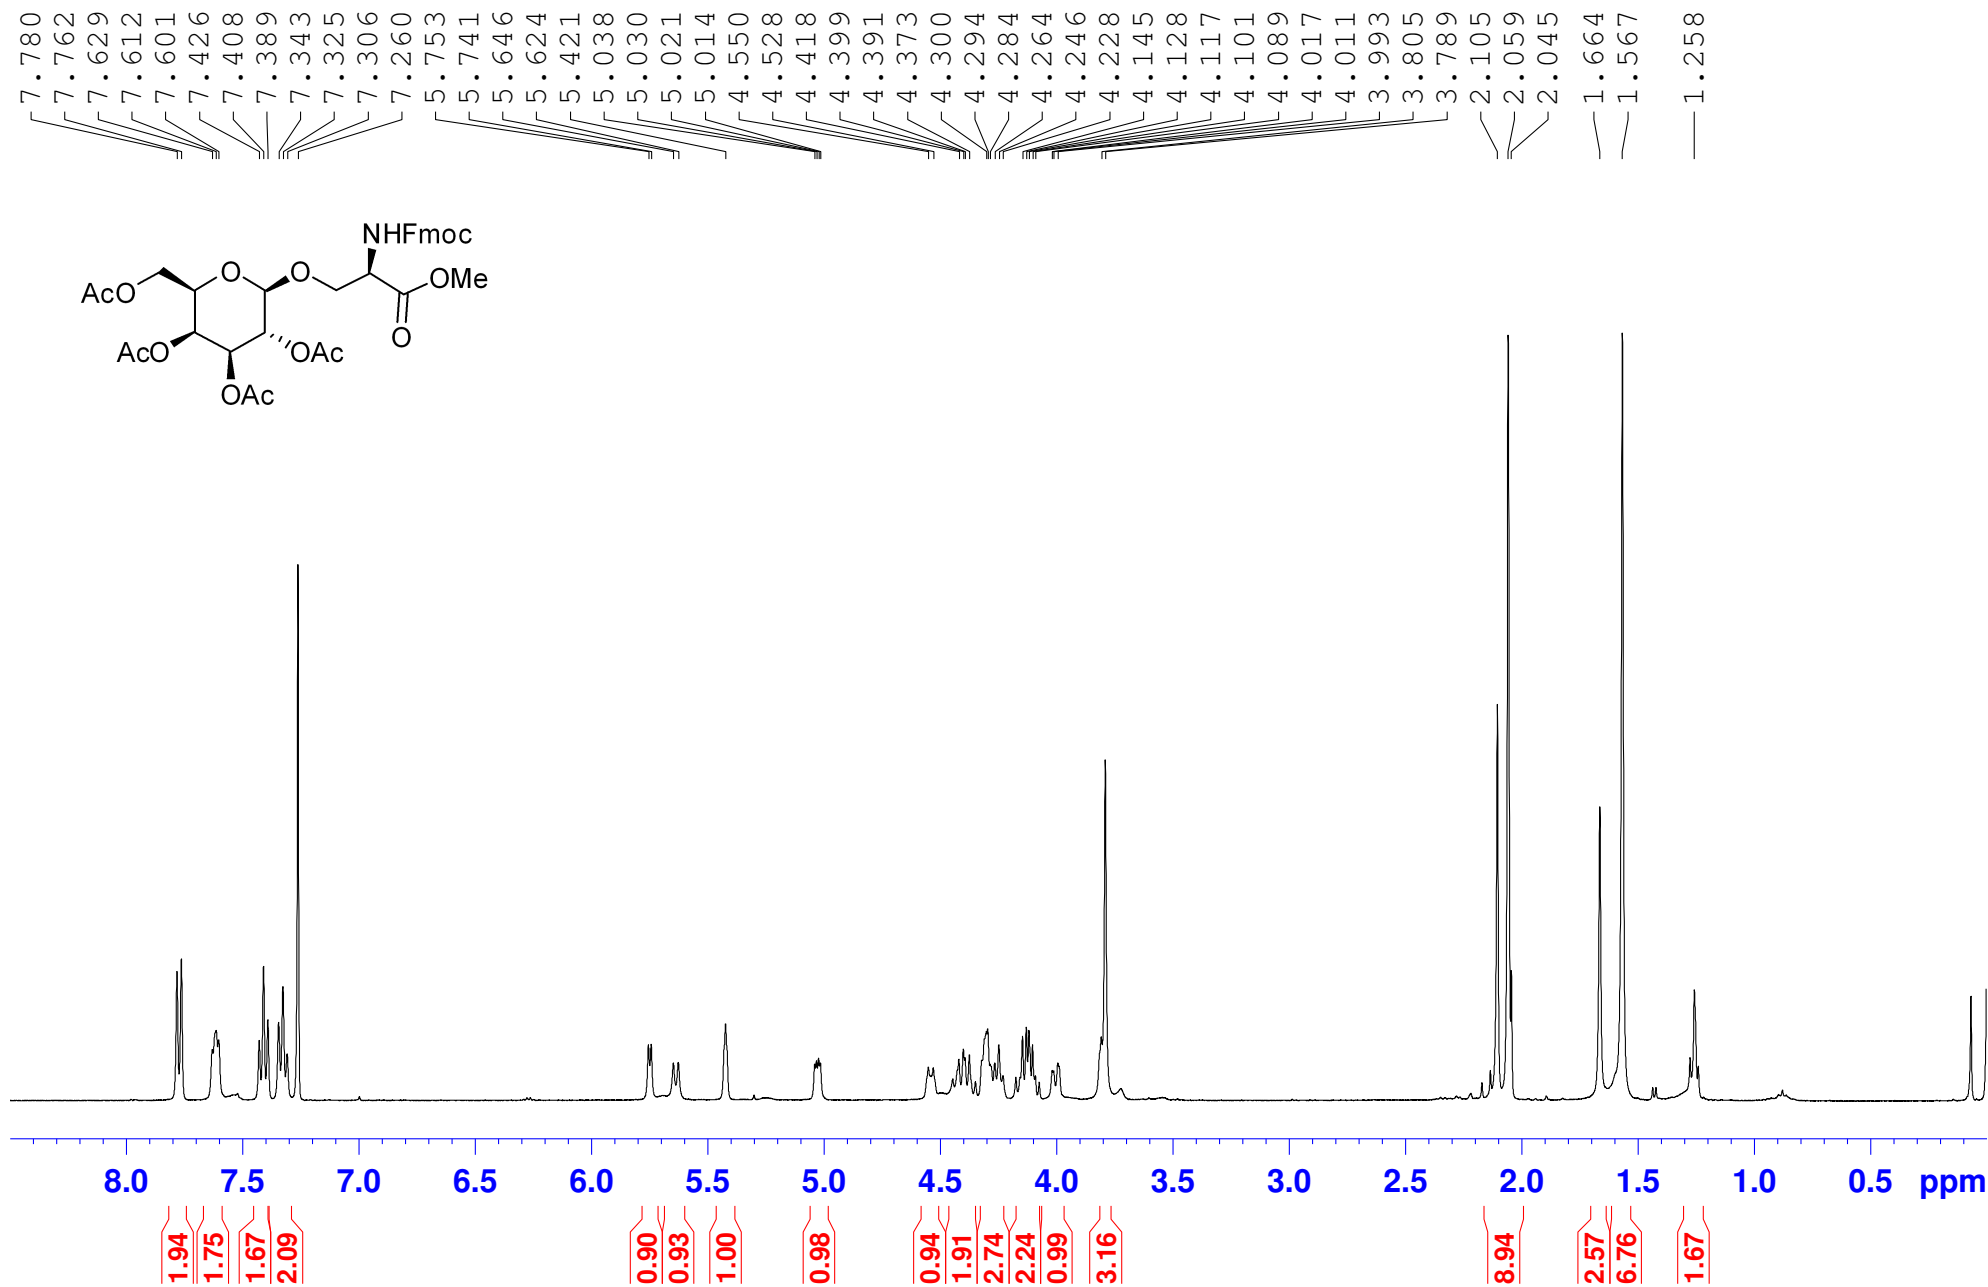

GBK-768, <sup>13</sup>C NMR, 400 MHz CDCl<sub>3</sub>

170.48  
170.40  
170.05  
169.79

155.94

143.84  
143.74  
141.30

127.76  
127.10  
125.13  
121.09  
120.02

97.53

73.98  
71.41  
69.29  
67.31  
65.90  
63.16  
61.32  
54.00  
52.71  
47.10

23.58  
20.72  
20.57

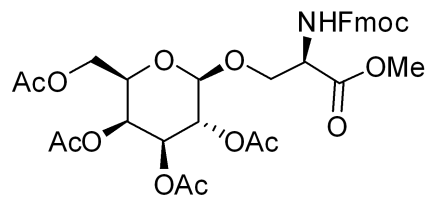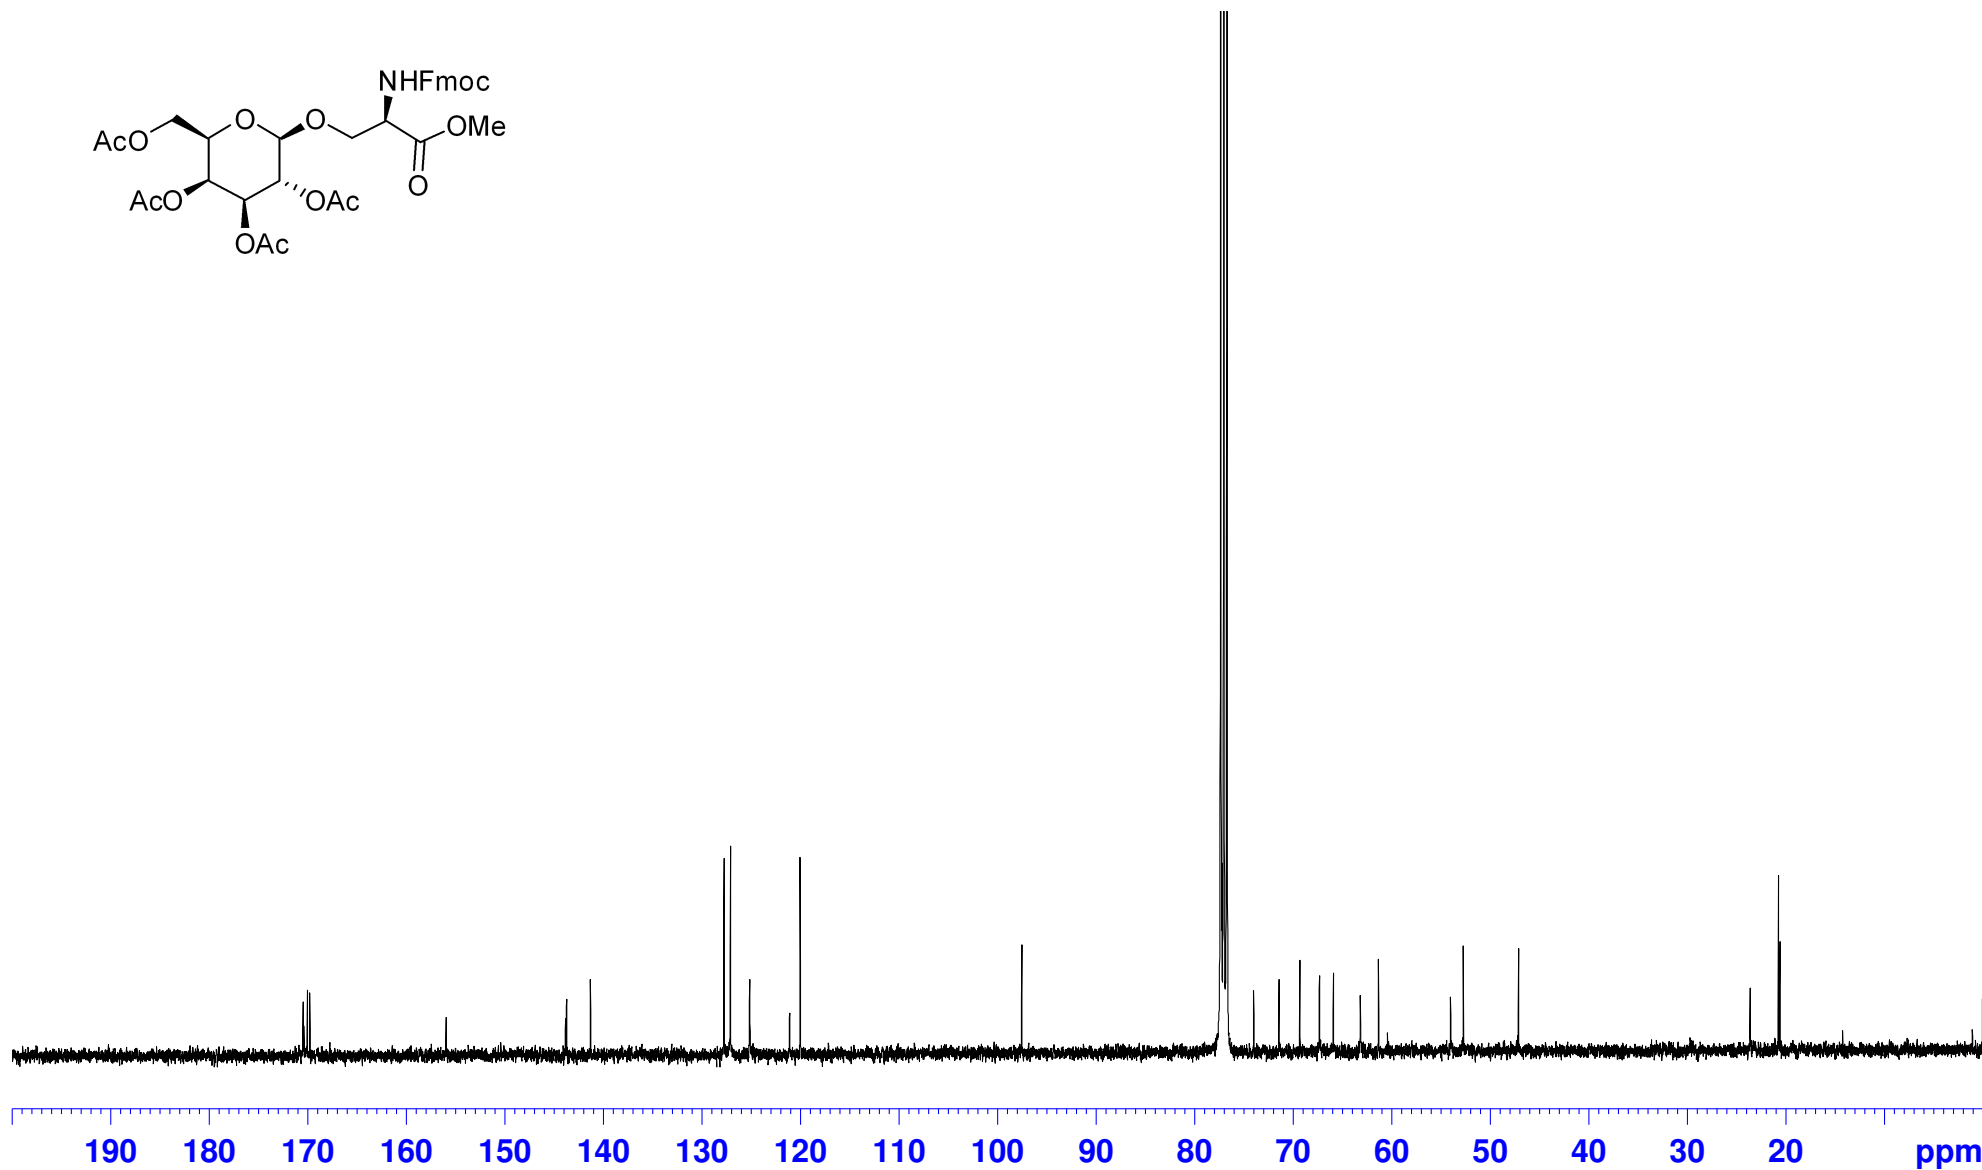

GBK-539, 1HNMR, 400NMR MEOD

5.930  
5.916  
5.901  
5.887  
5.874  
5.299  
5.296  
5.291  
5.256  
5.253  
5.248  
5.121  
5.118  
5.095  
5.092  
4.768  
4.251  
4.231  
4.186  
4.173  
4.153  
4.140  
3.999  
3.984  
3.967  
3.952  
3.817  
3.787  
3.756  
3.751  
3.727  
3.721  
3.624  
3.615  
3.600  
3.585  
3.578  
3.535  
3.530  
3.521  
3.510  
3.505  
3.496  
3.491  
3.361  
3.351  
3.336  
3.327  
3.295  
3.273  
3.255  
3.250  
3.247  
3.243  
3.233  
3.208  
3.193  
3.163  
3.143

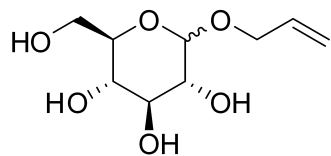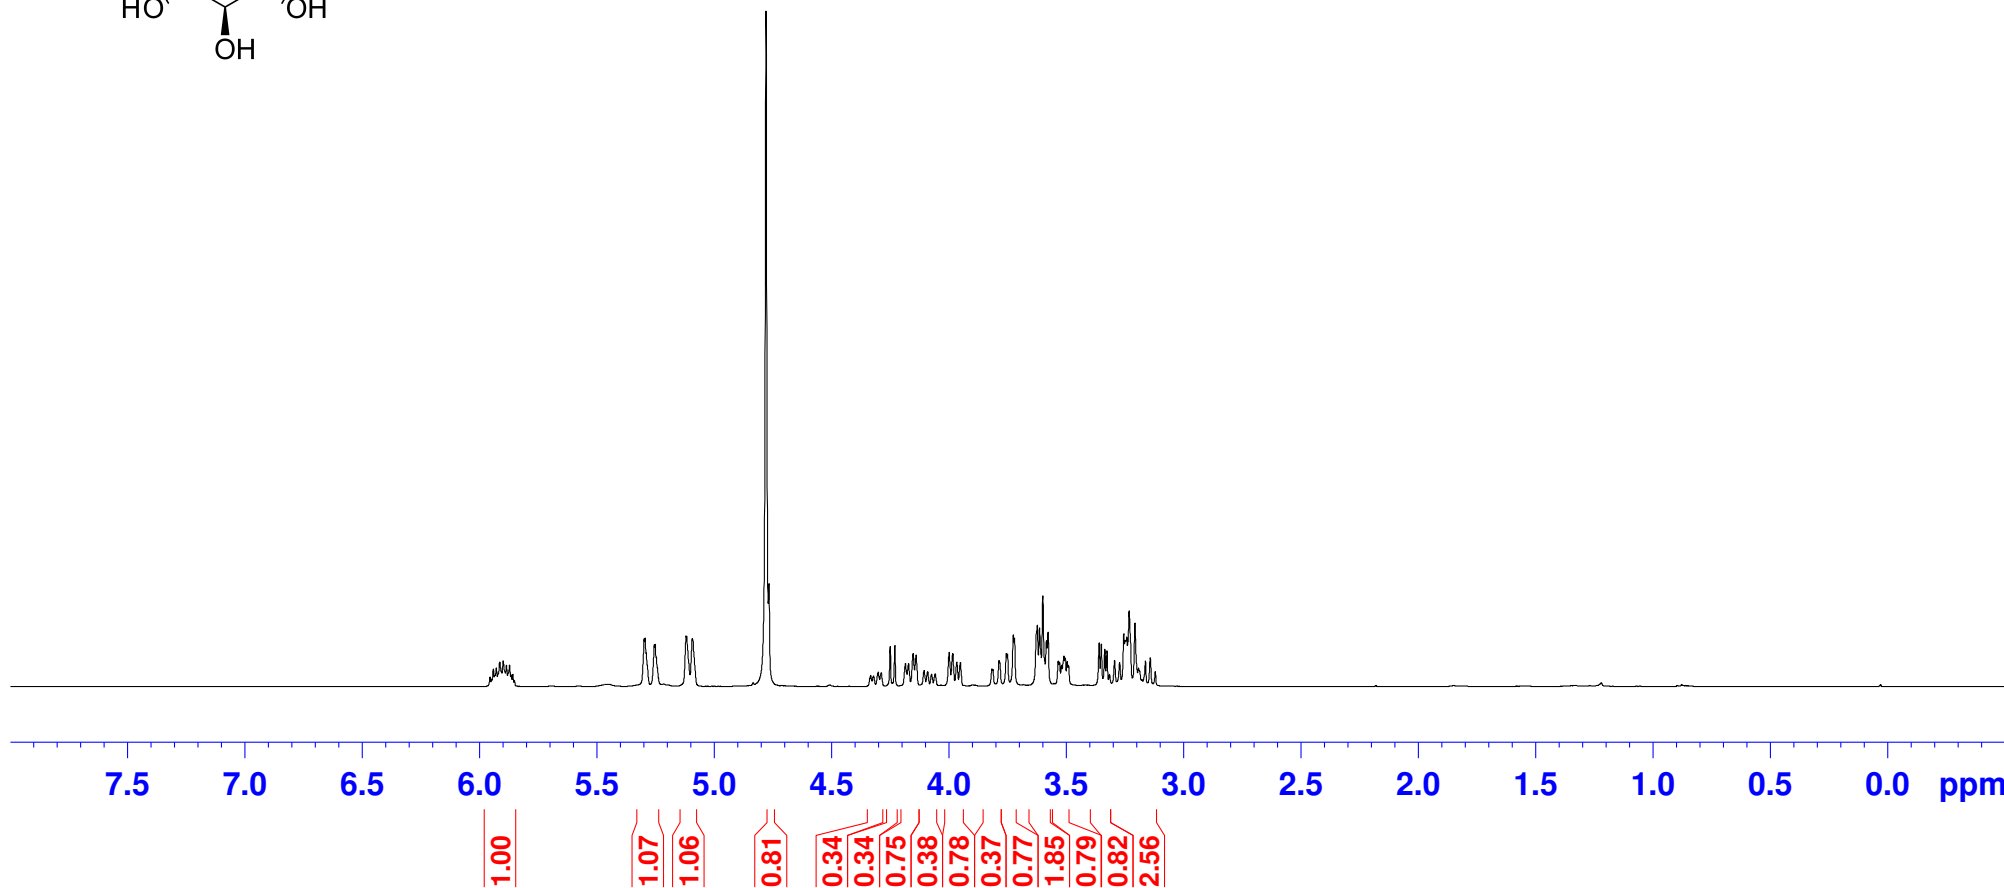



GBK-539, <sup>13</sup>C NMR, 400NMR MEOD

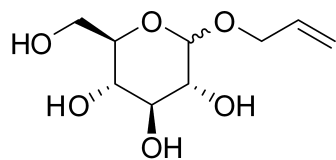

134.36  
134.23

116.17  
116.12

101.95  
97.79

76.67  
76.53  
73.69  
73.66  
72.37  
72.11  
70.40  
70.22  
69.67  
67.90  
61.36  
61.27  
48.30  
48.09  
47.88  
47.66  
47.45  
47.24  
47.03

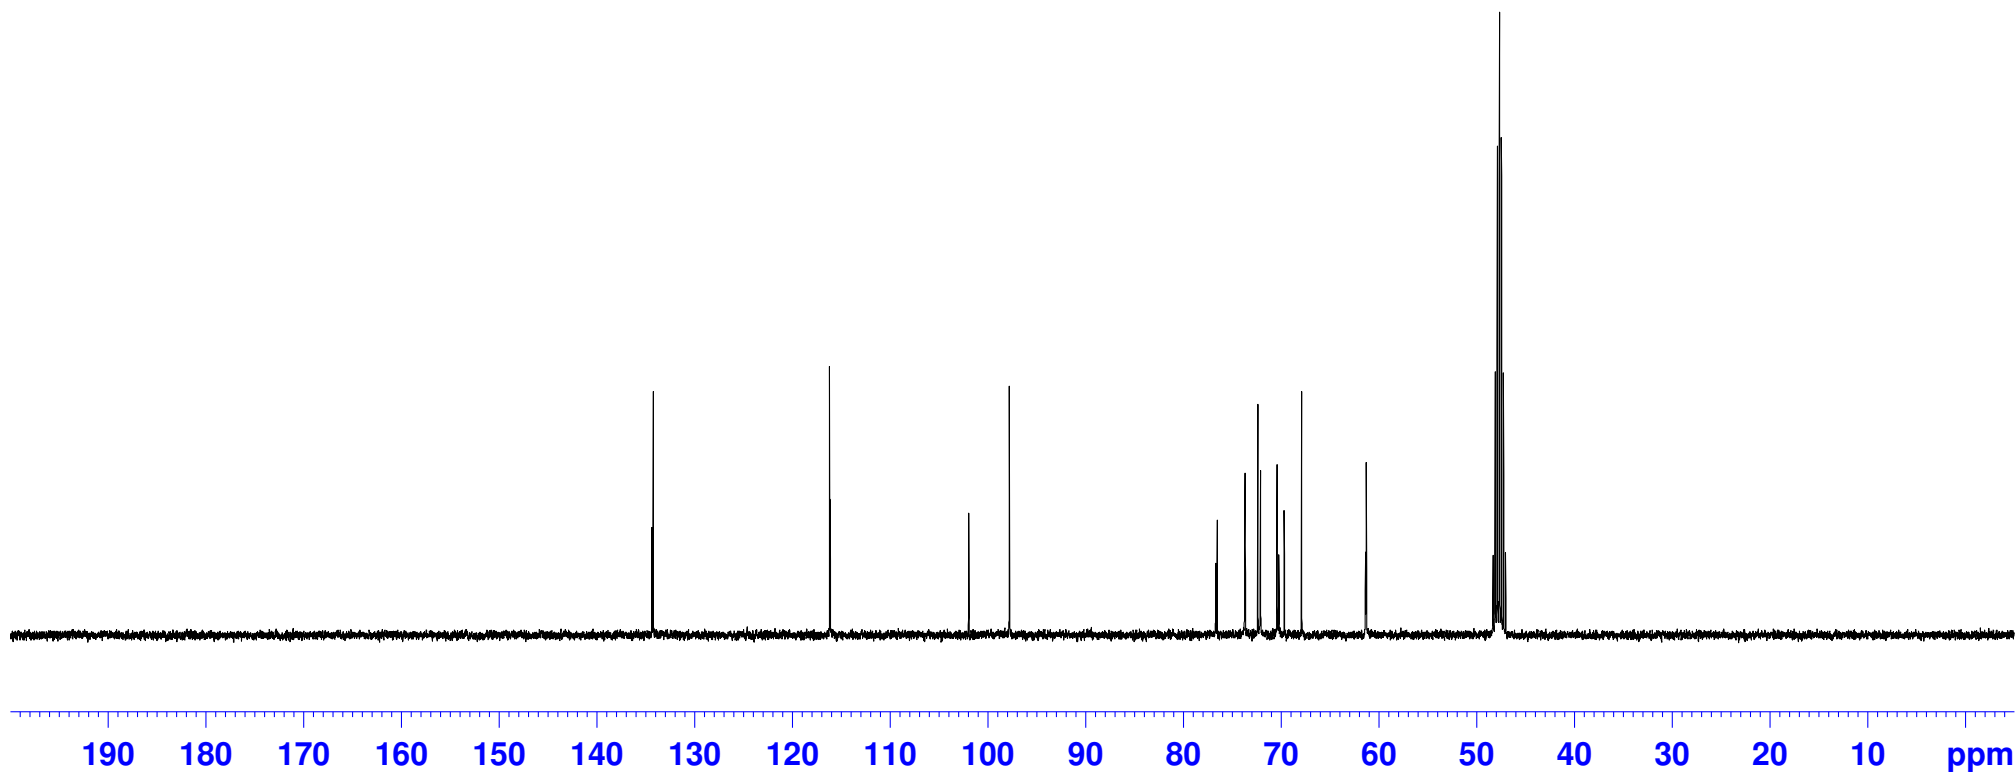



GBK-554, 400NMR CDCl3 13C NMR

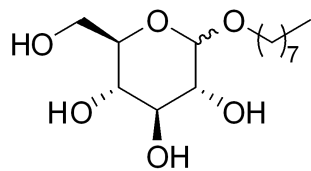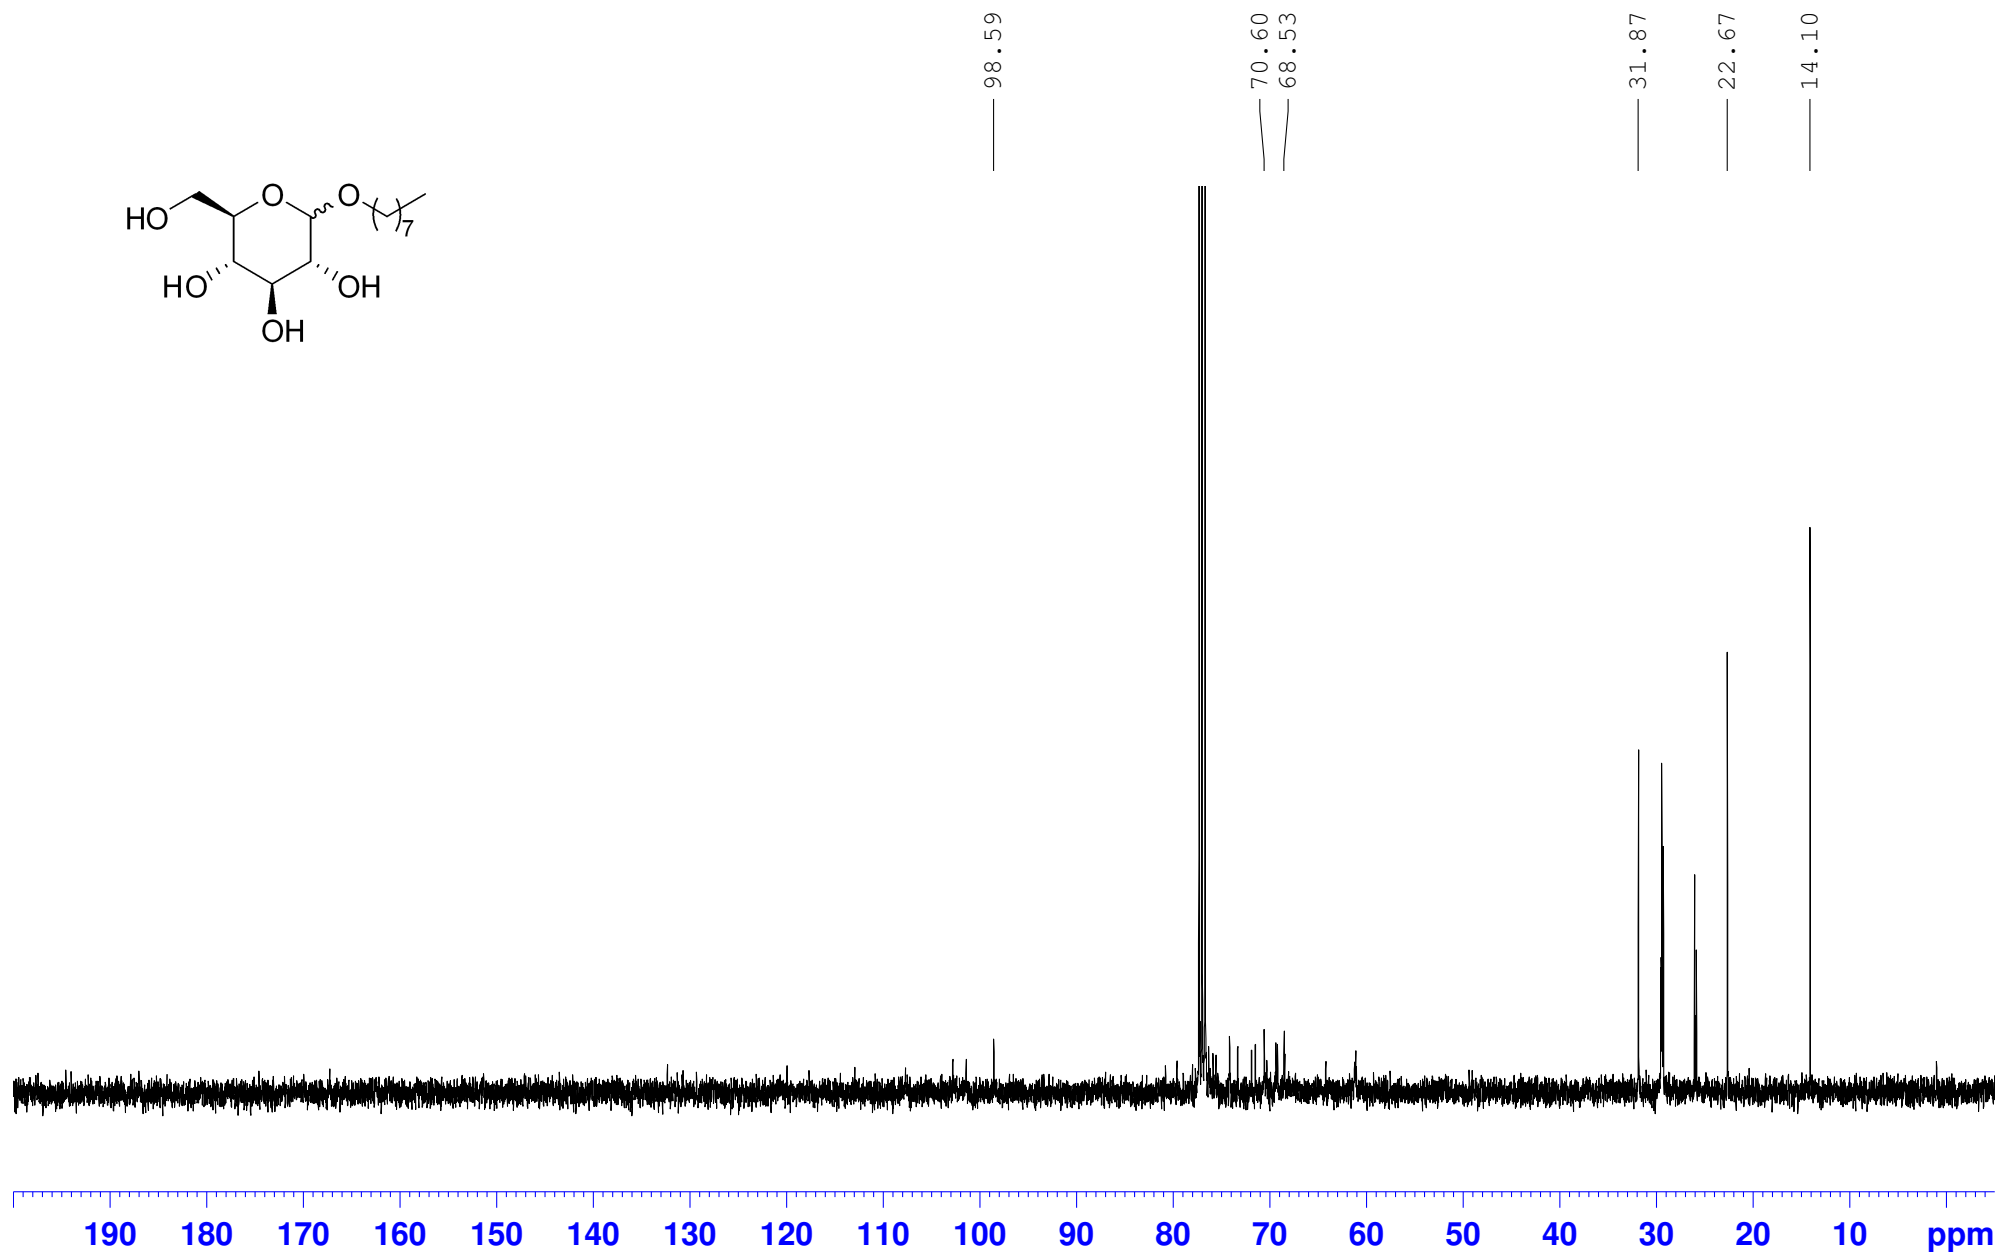

GBK-556, 400NMR MEOD 1H NMR

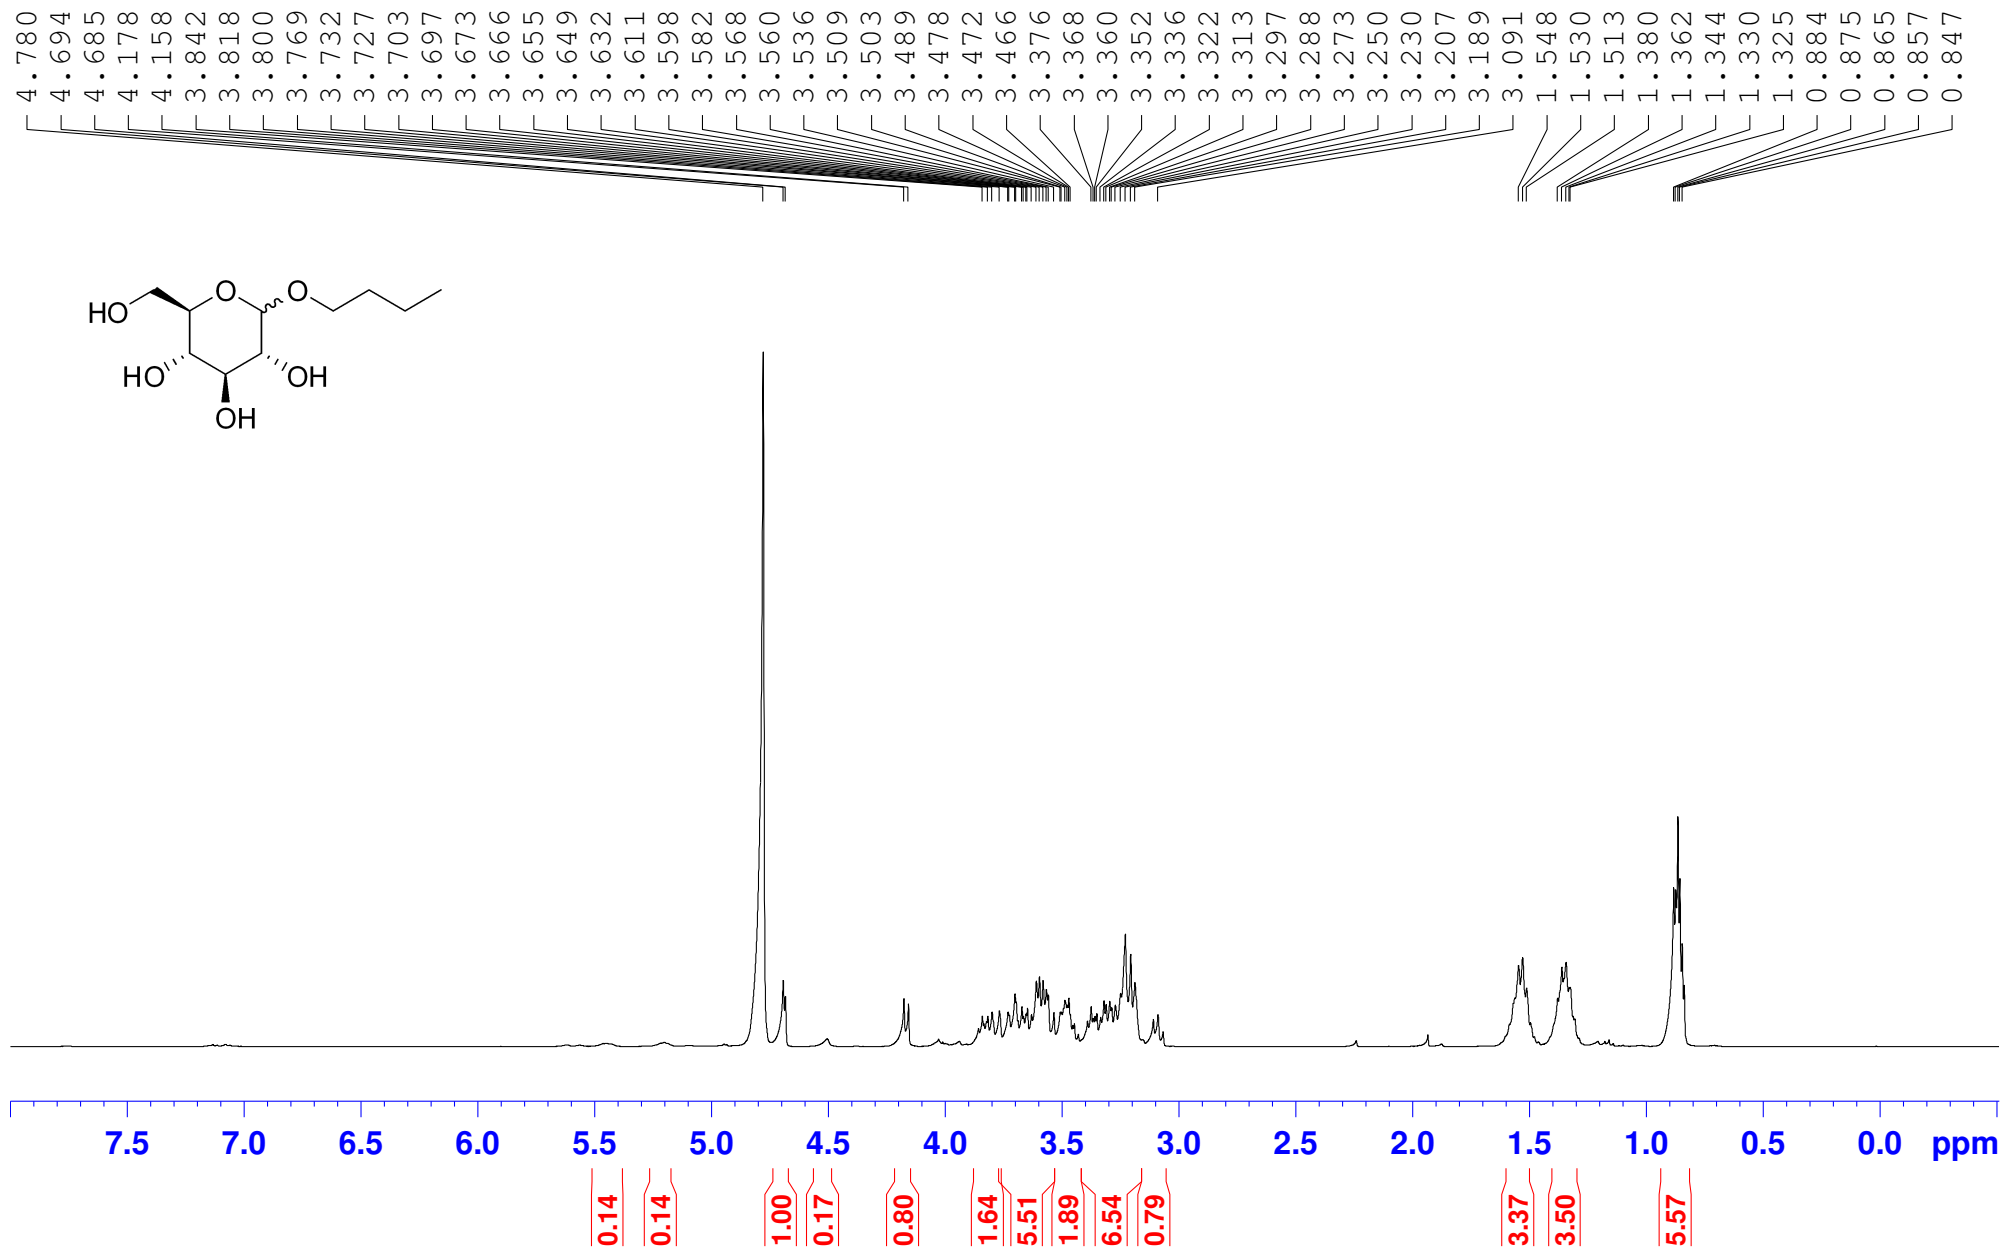

GBK-556, 400NMR MEOD 13C NMR

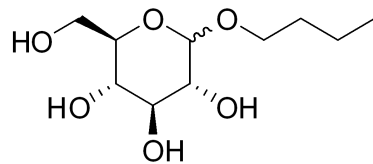

102.96

98.66

76.49

73.73

72.23

70.43

69.20

67.41

61.30

31.36

19.07

18.83

12.89

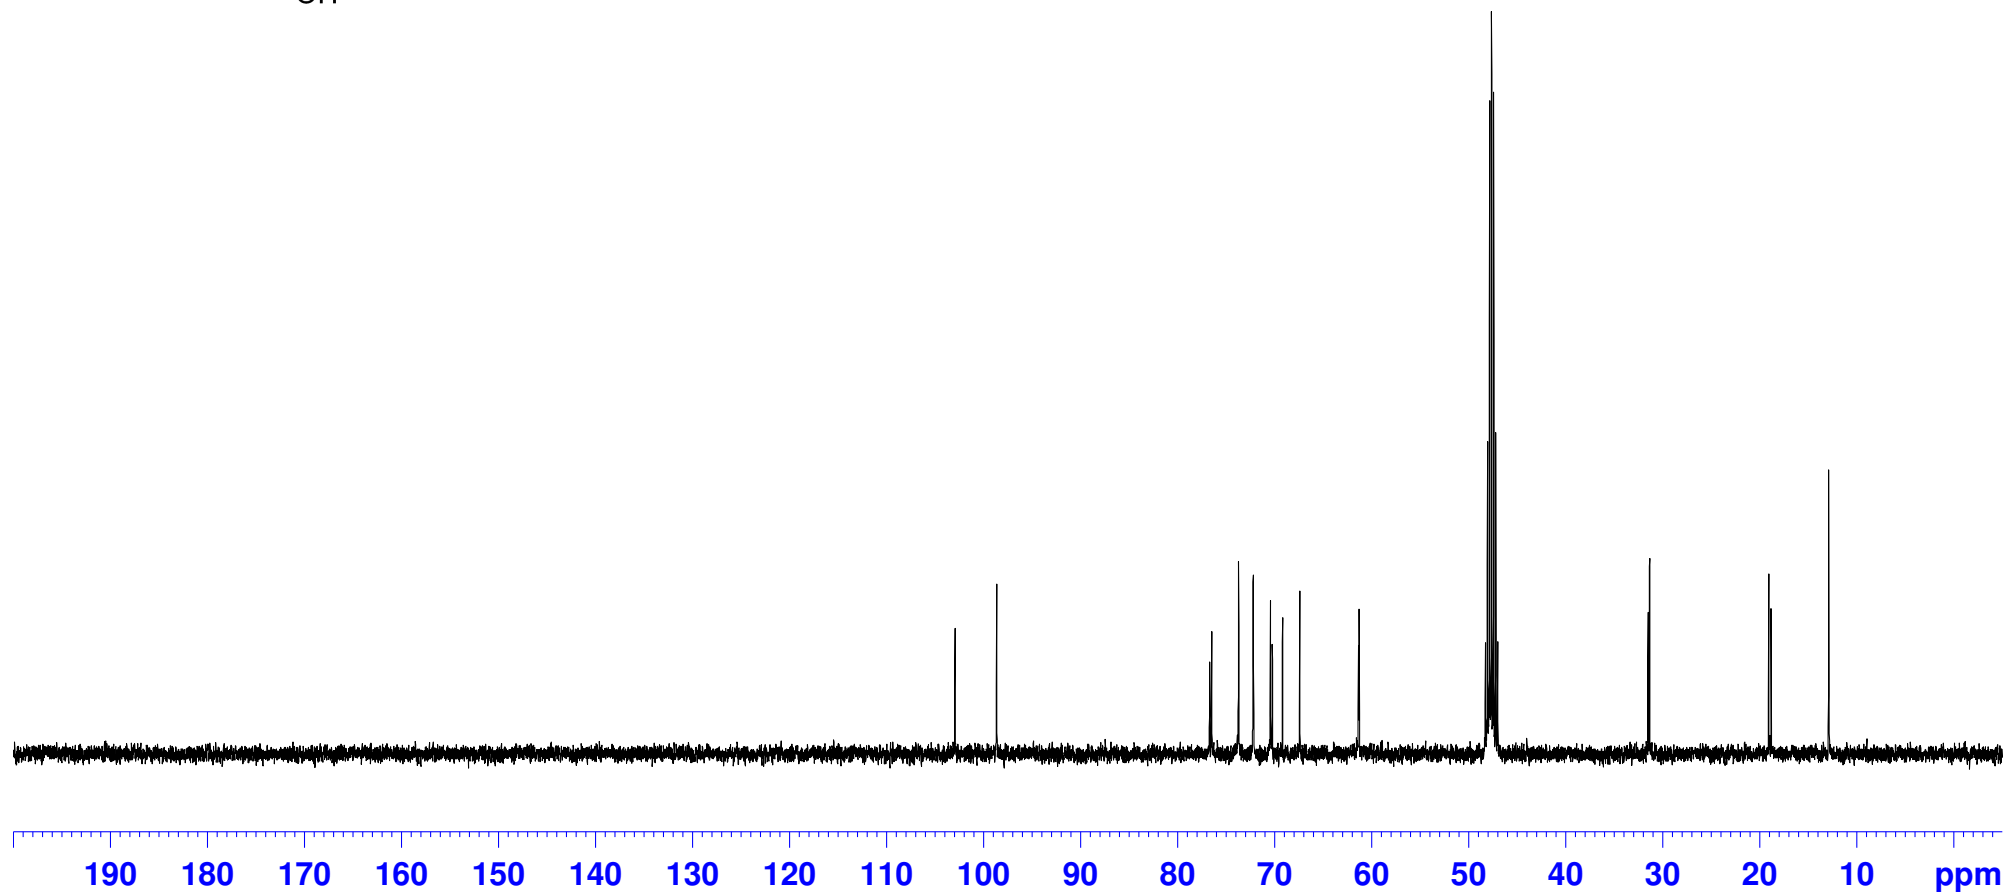

GBK-568, 1H AV400MHz, MEOD

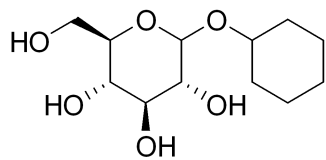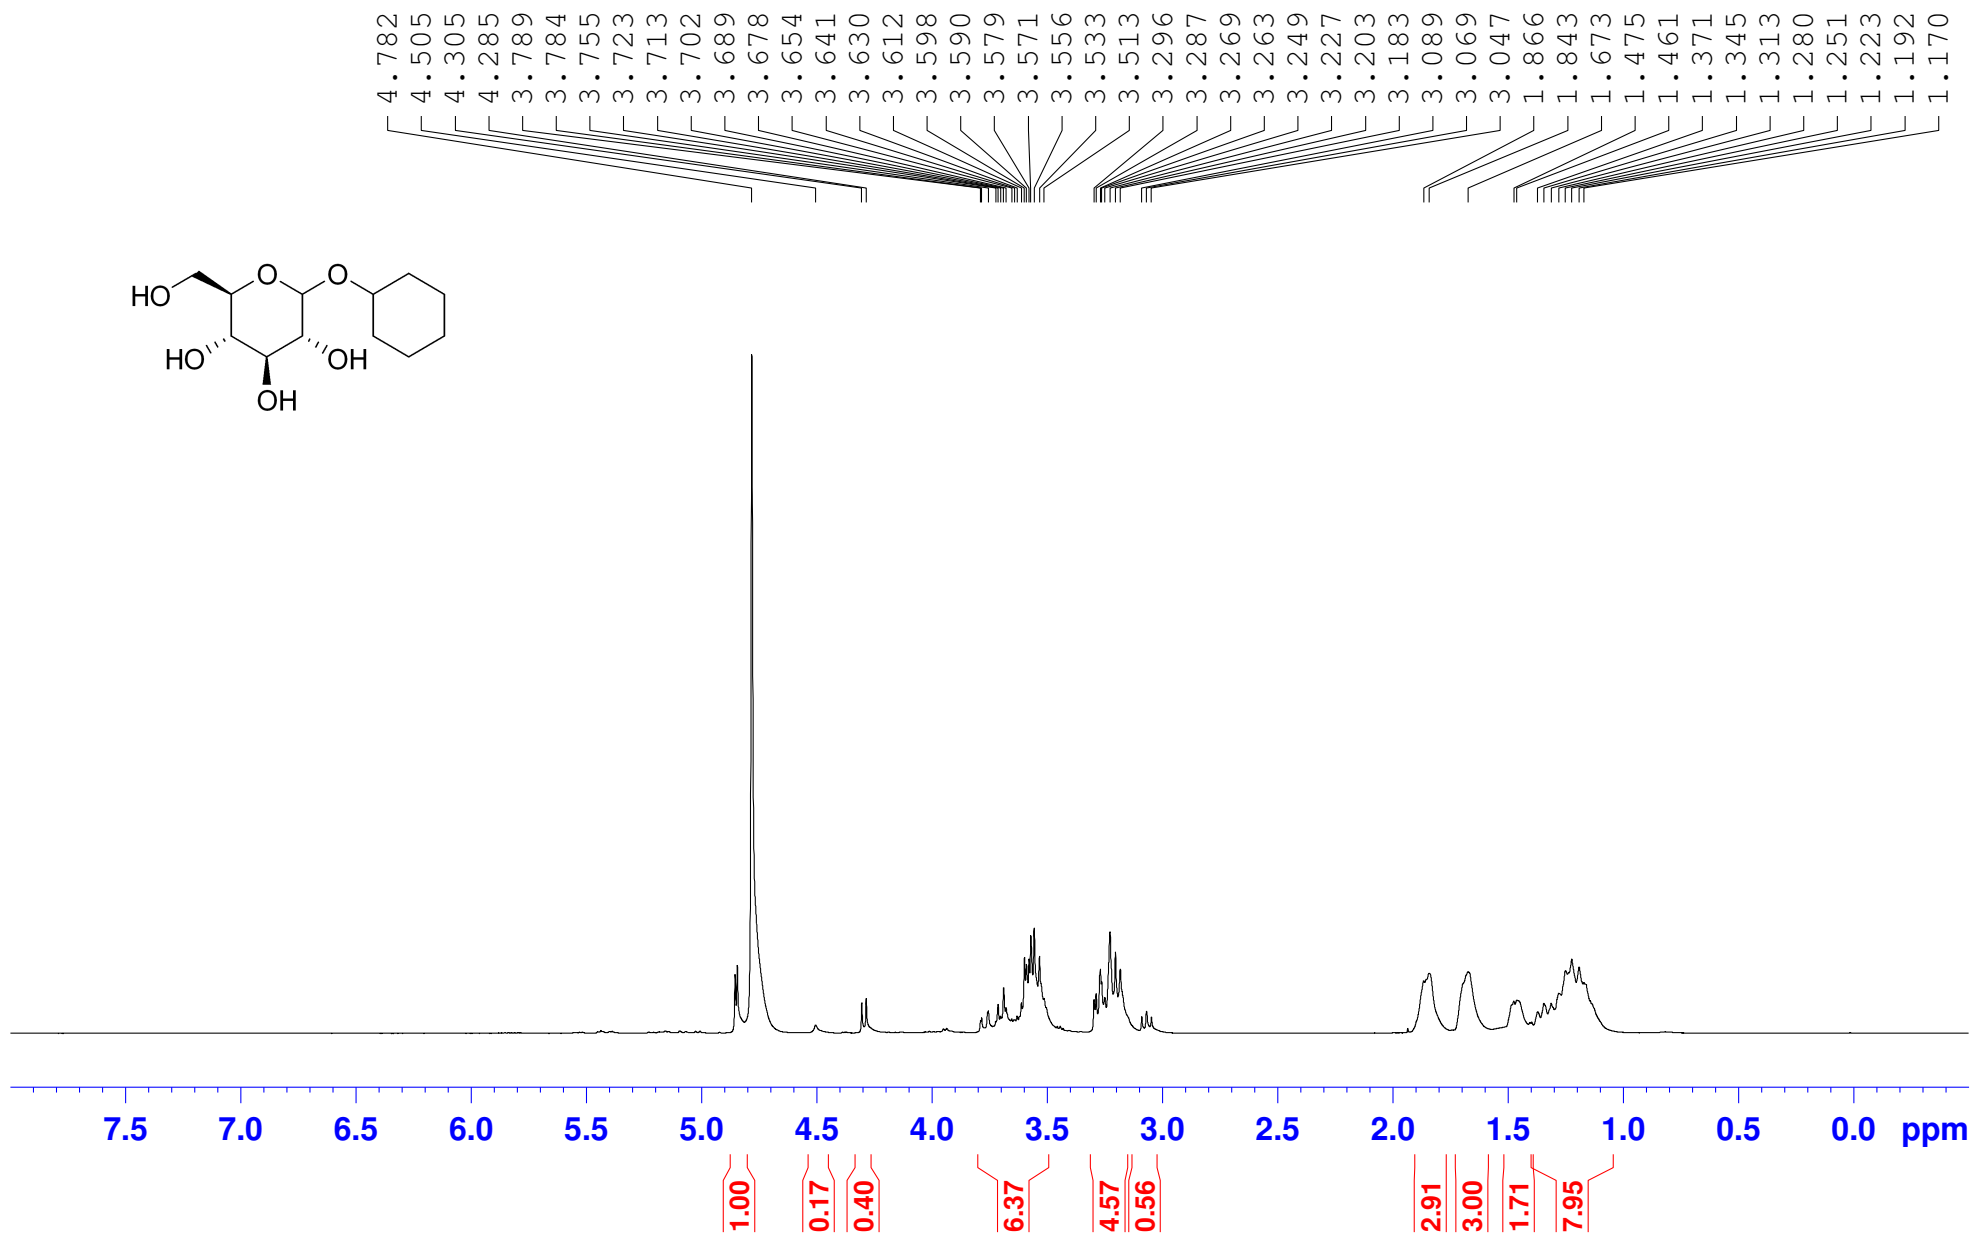

GBK-568, 13C AV400MHz, MEOD

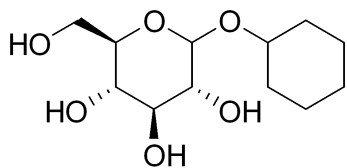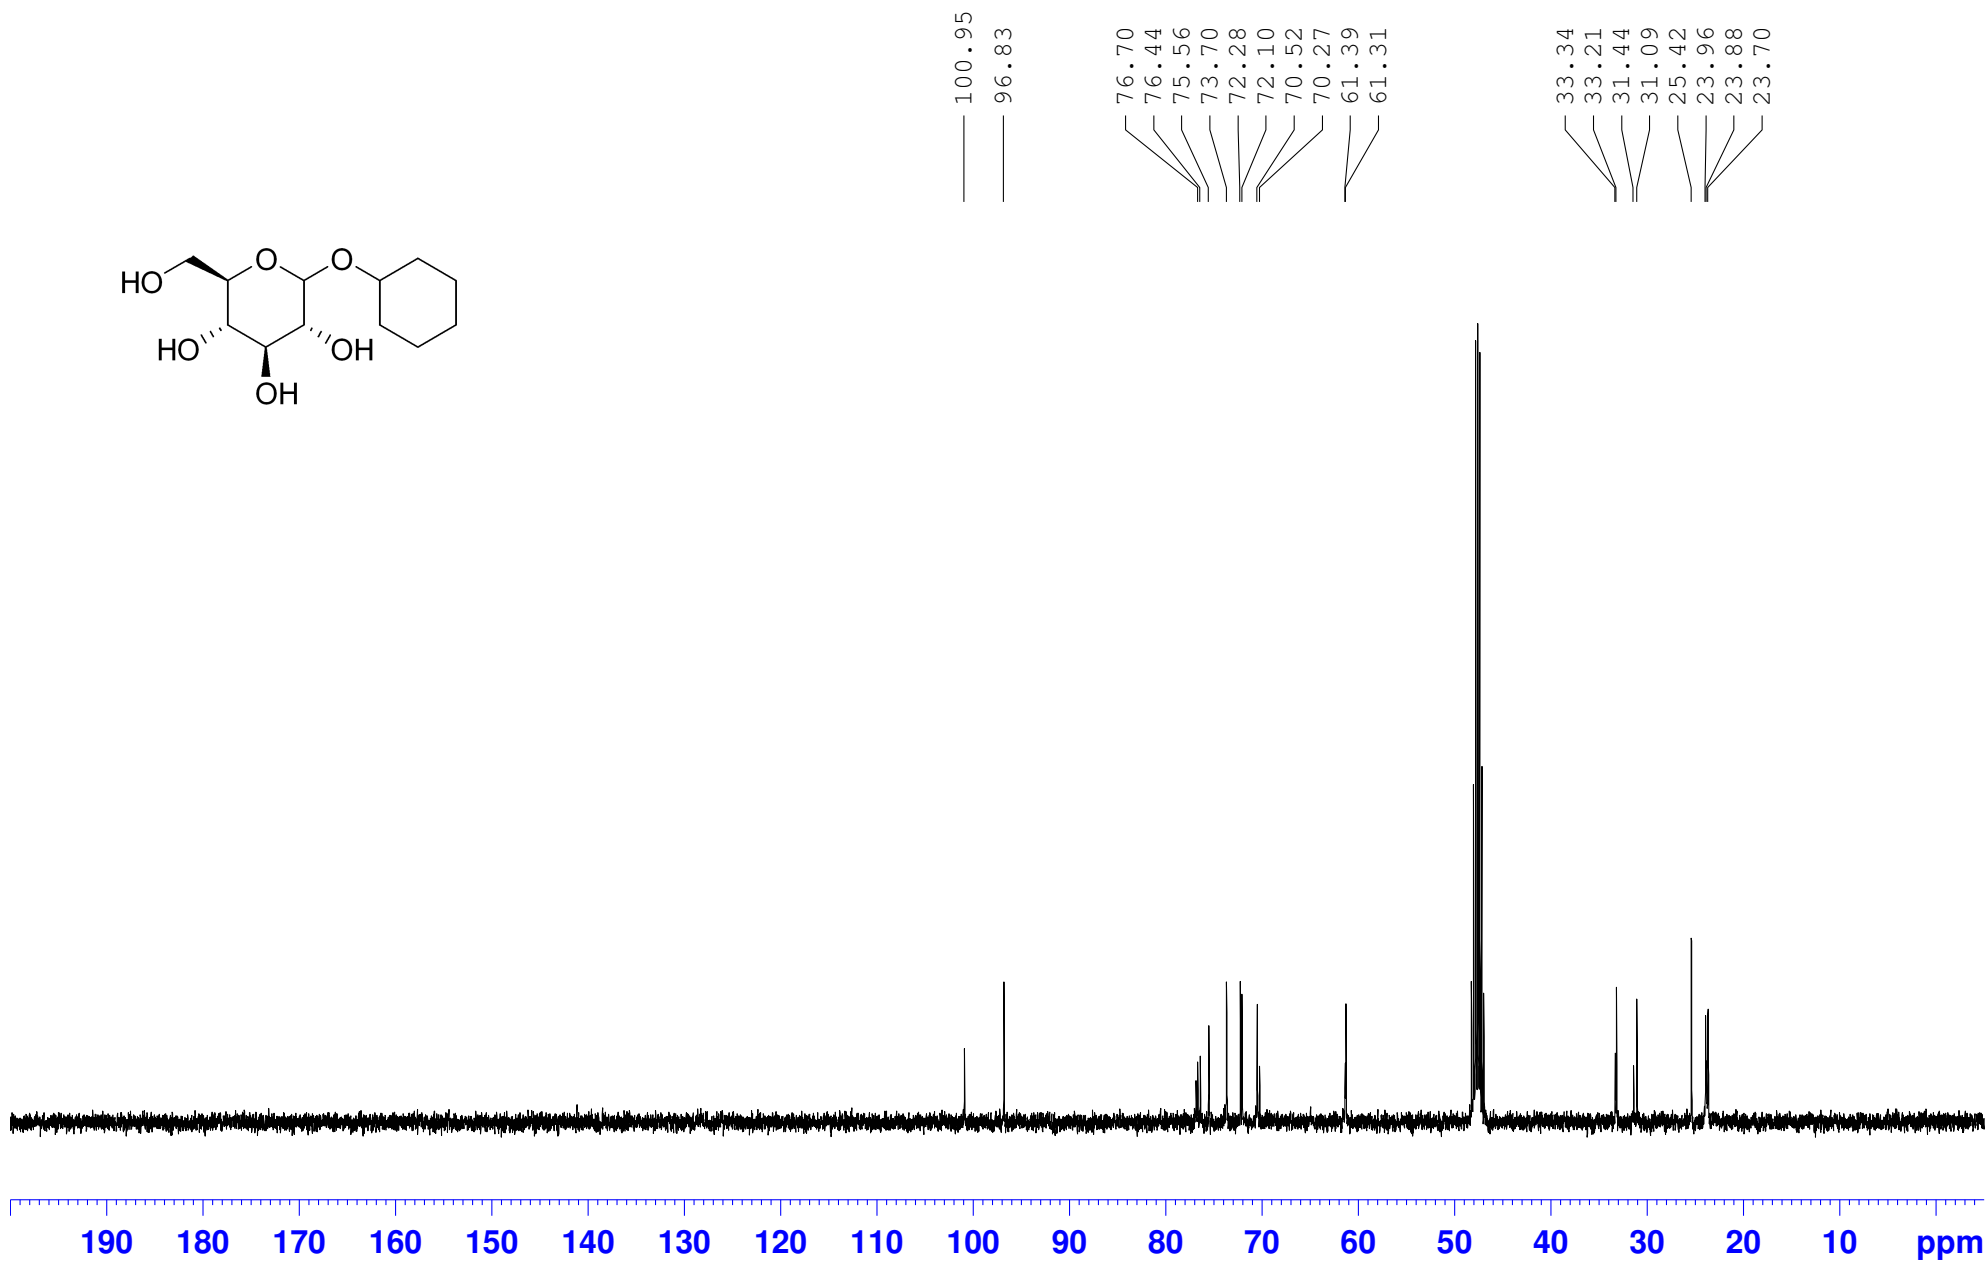

GBK-569-allyloxyethanol, Av400 MeOD, 01-Dec-10

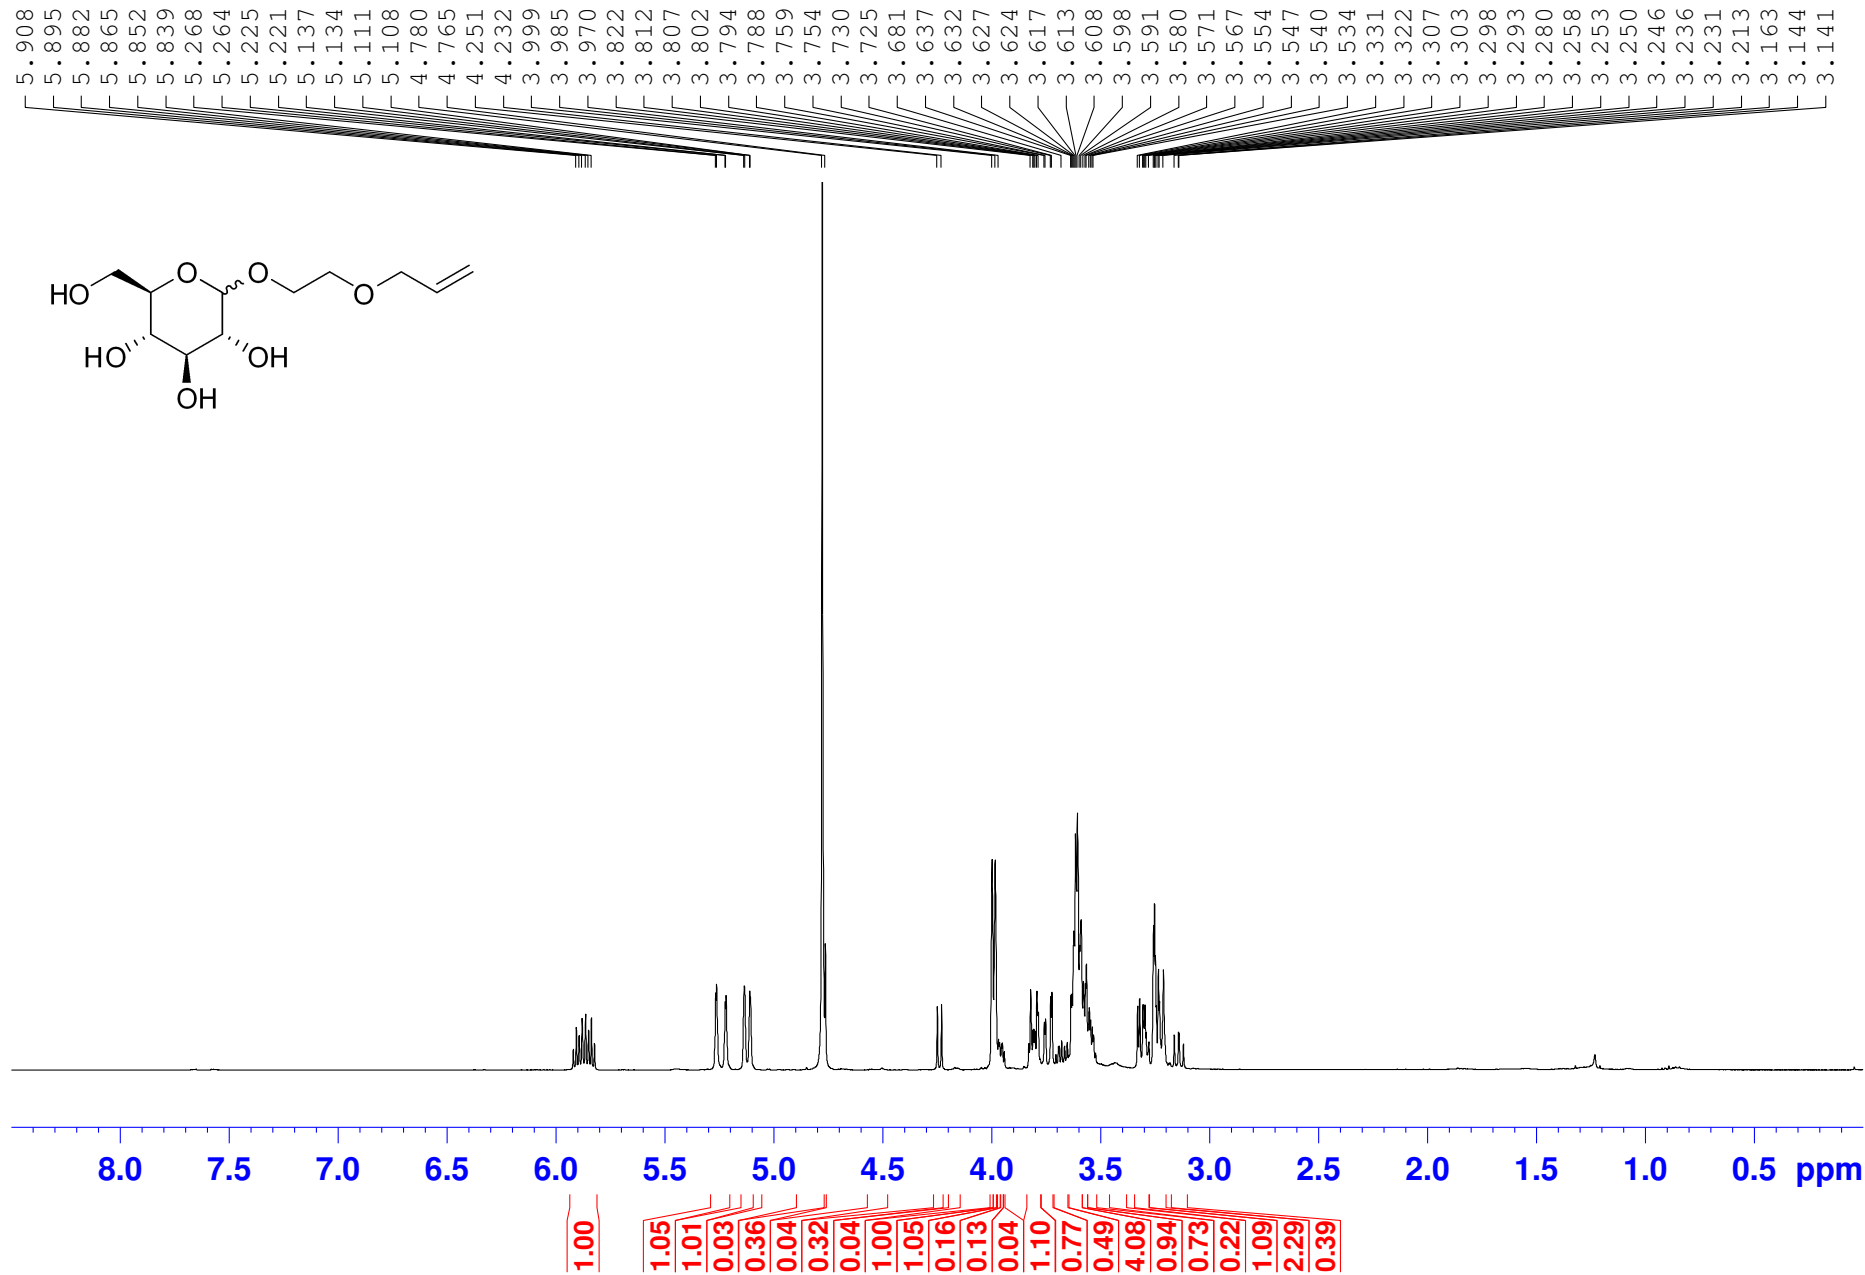



GBK-569, 13C AV400MHz, MEOD

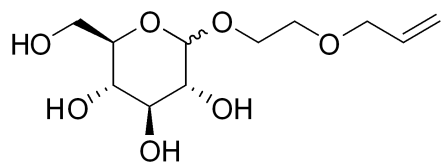

134.52  
134.47

116.28  
116.19

103.02  
98.93

76.56  
76.51  
73.75  
73.66  
72.29  
71.75  
71.72  
70.34  
70.19  
69.14  
69.01  
68.22  
66.70  
61.36  
61.25  
47.84  
47.63  
47.42

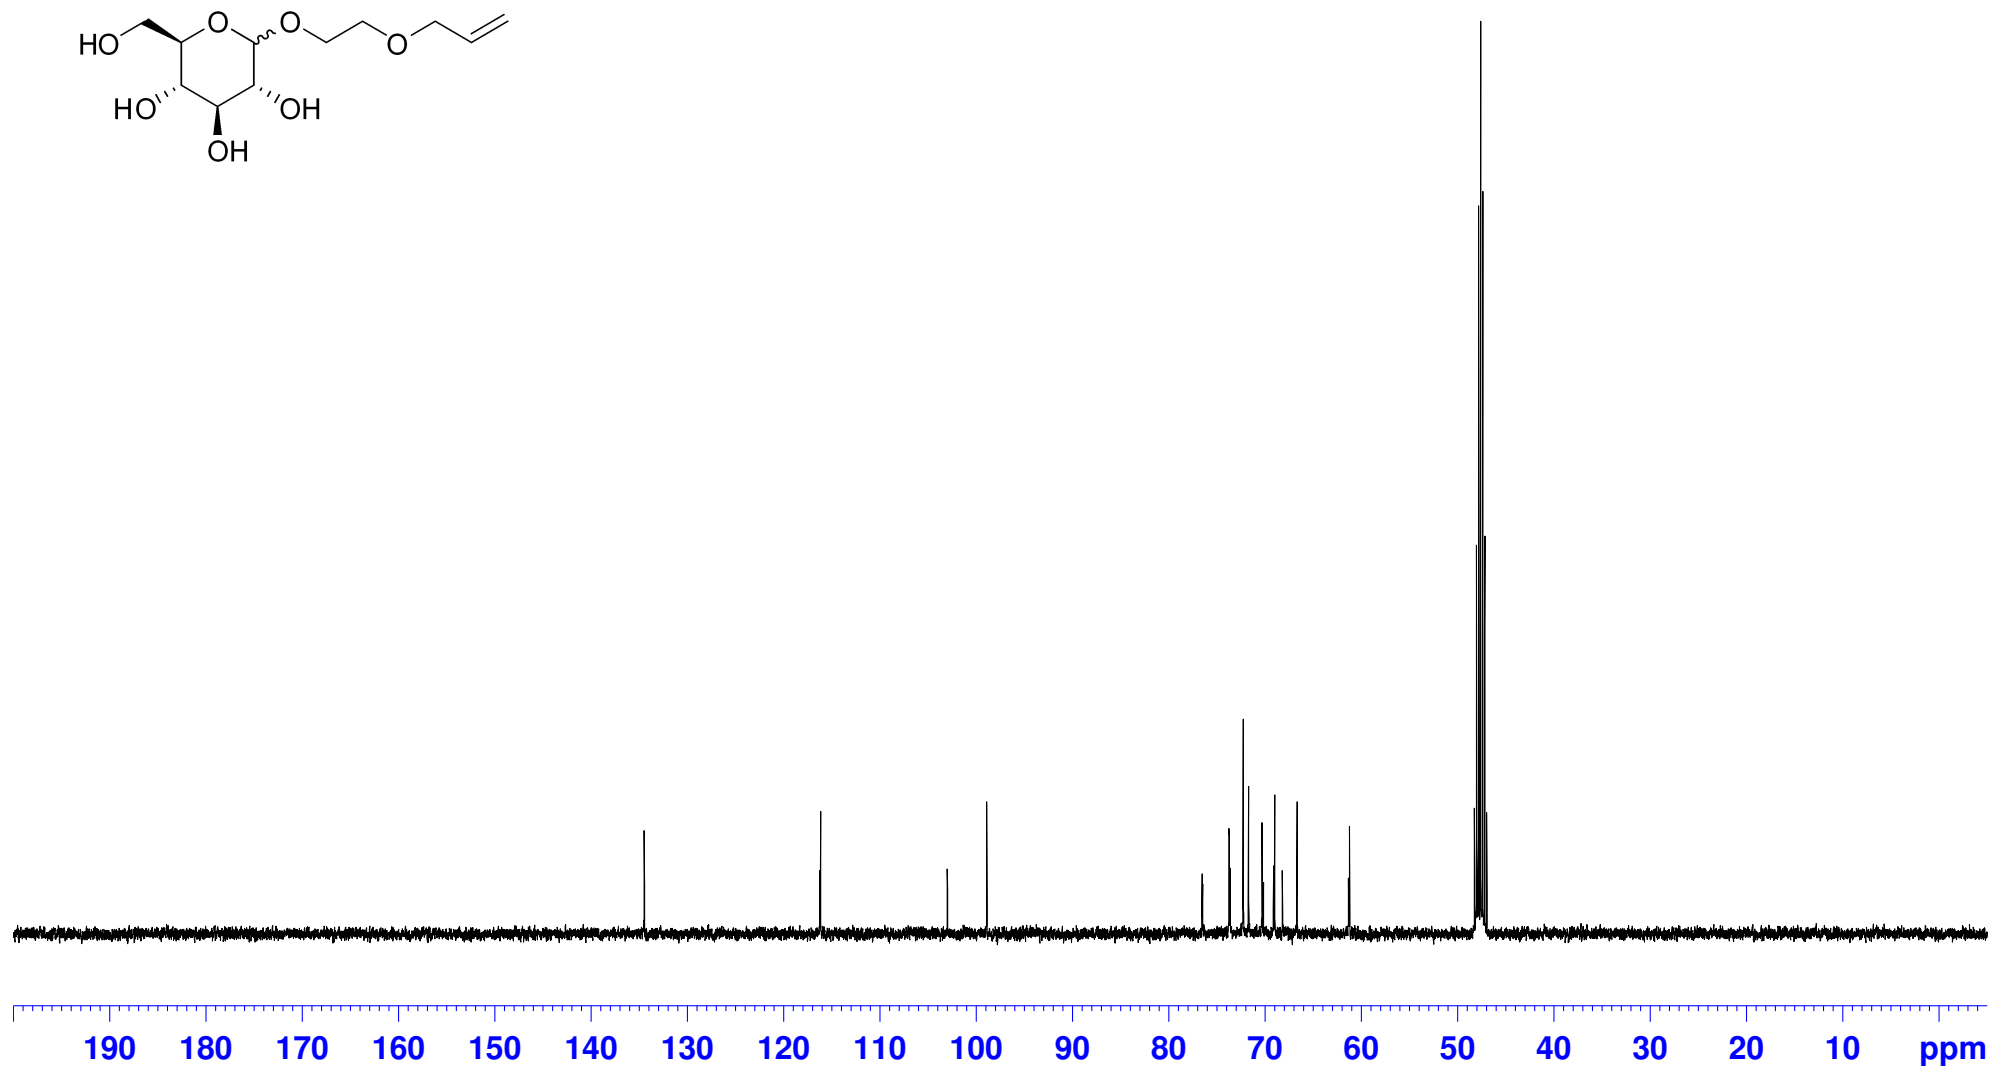

GBK-543-galactose, Av400 MeOD, 01-Dec-10

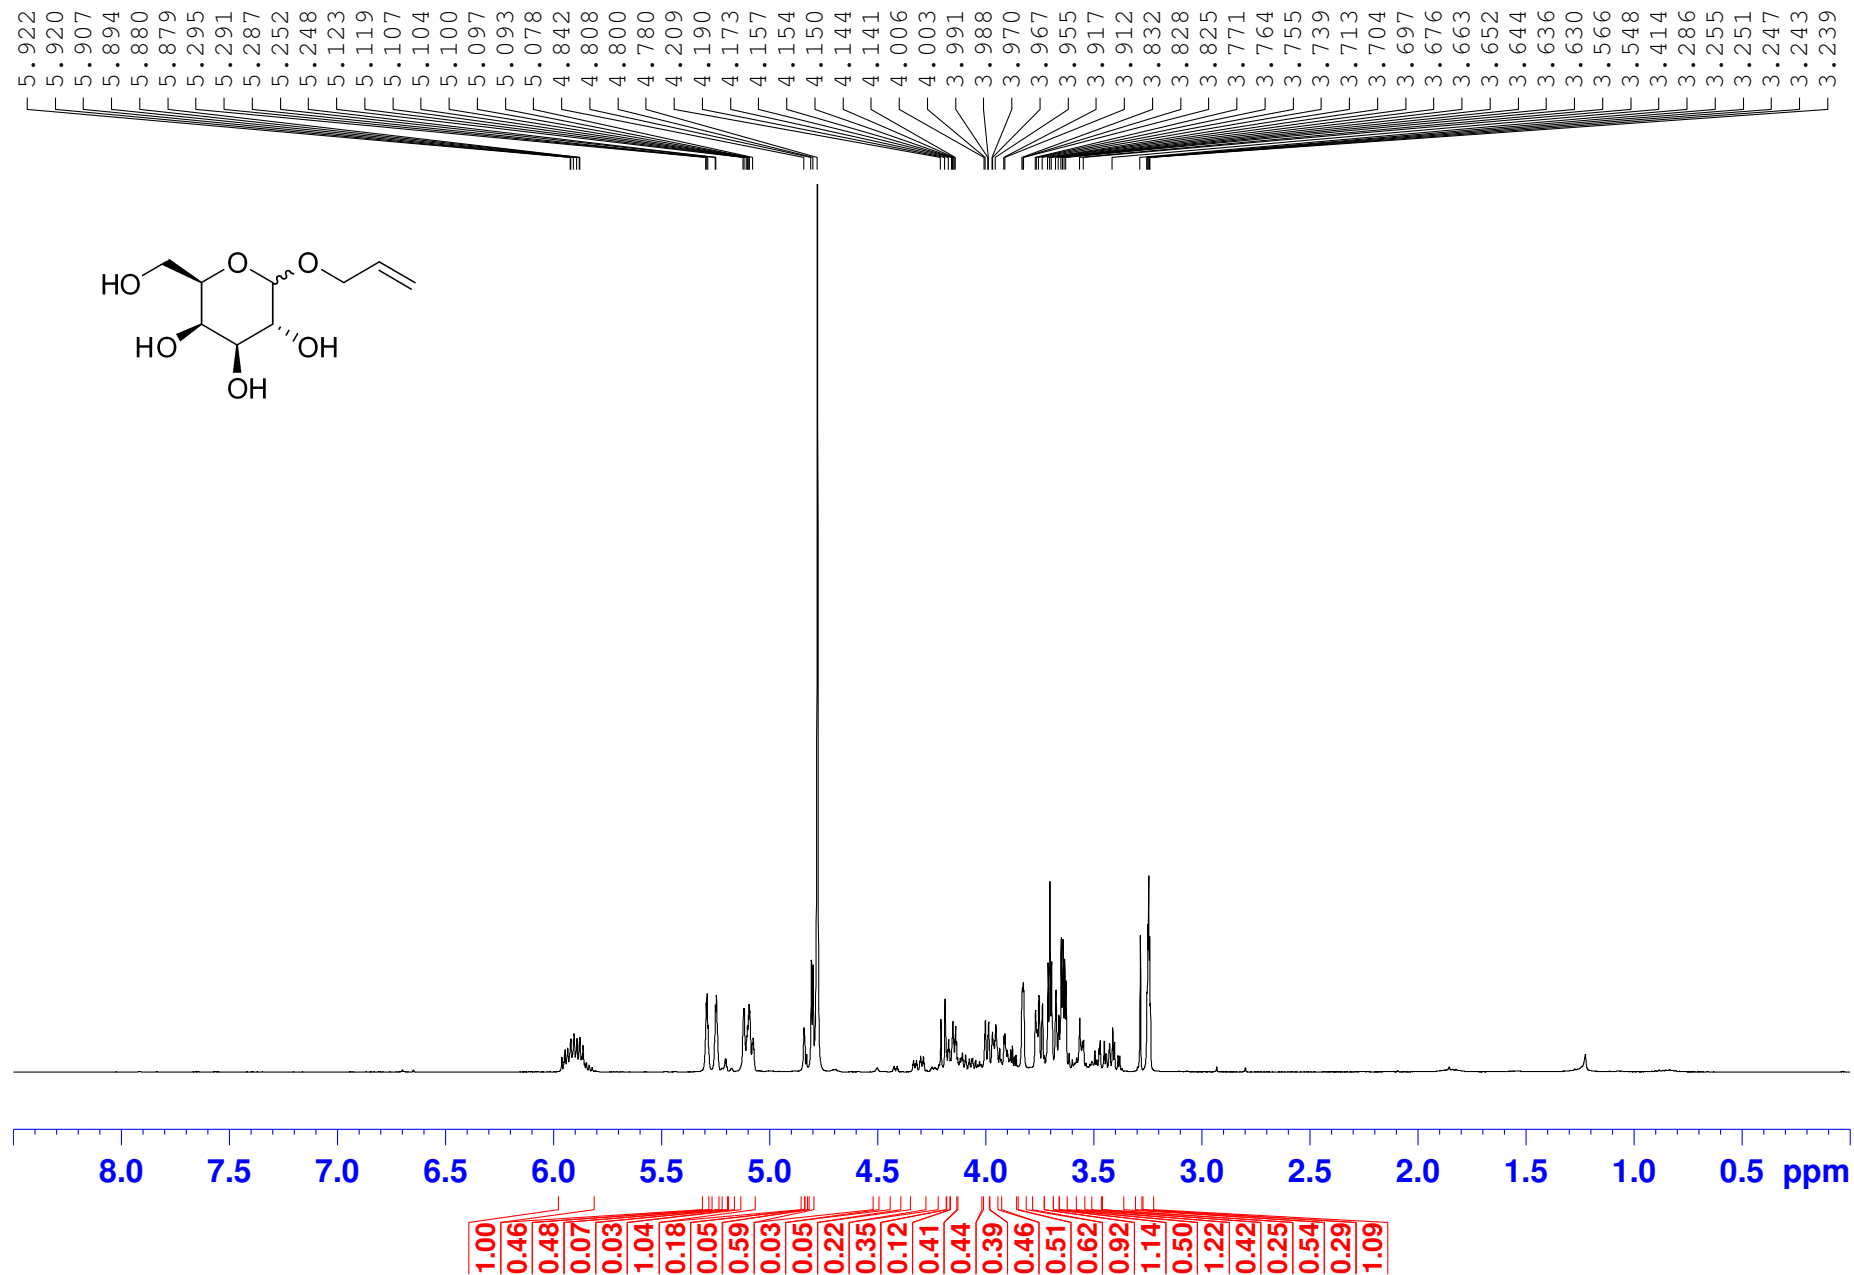

GBK-543B, <sup>13</sup>C NMR, 400NMR MEOD

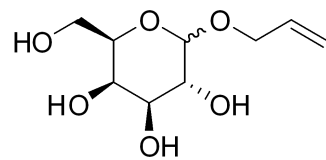

134.46  
134.29

116.10  
115.96

102.60  
98.06

75.27  
73.61  
71.08  
70.11  
69.69  
69.61  
68.91  
68.82  
67.97  
61.34  
61.11  
48.04  
47.83  
47.62  
47.41  
47.19

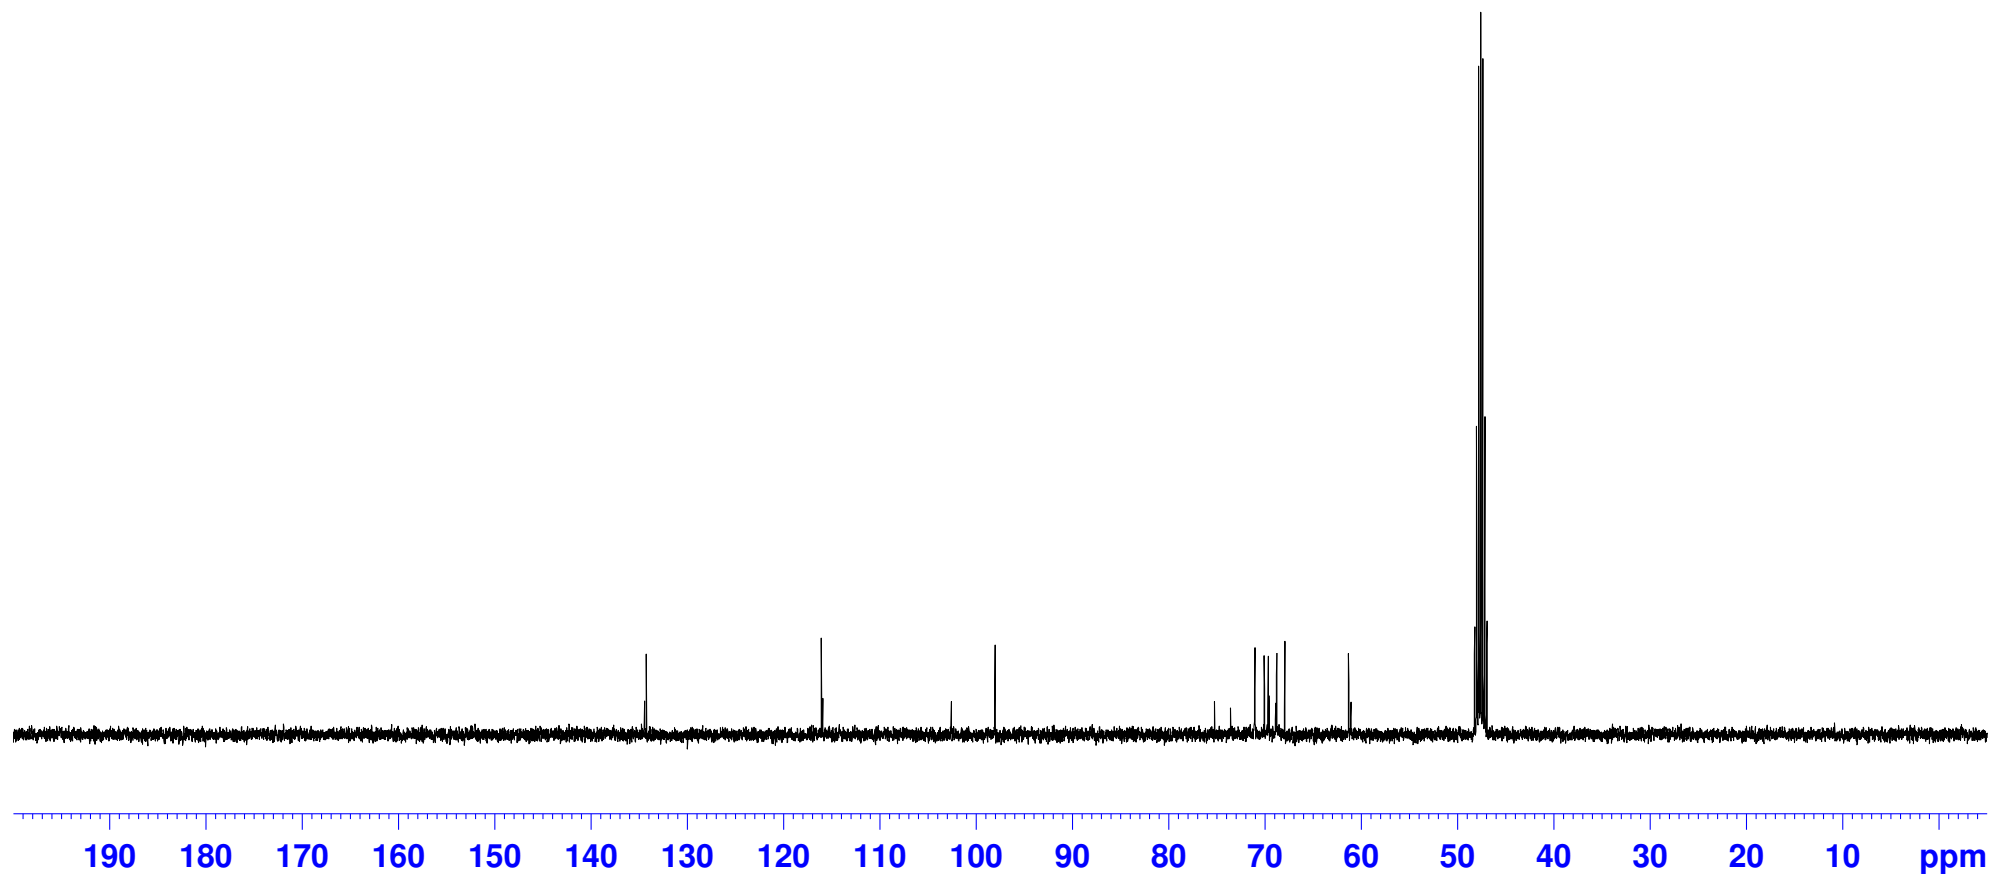

GBK-546-fucose, Av400 MeOD, 01-Dec-10

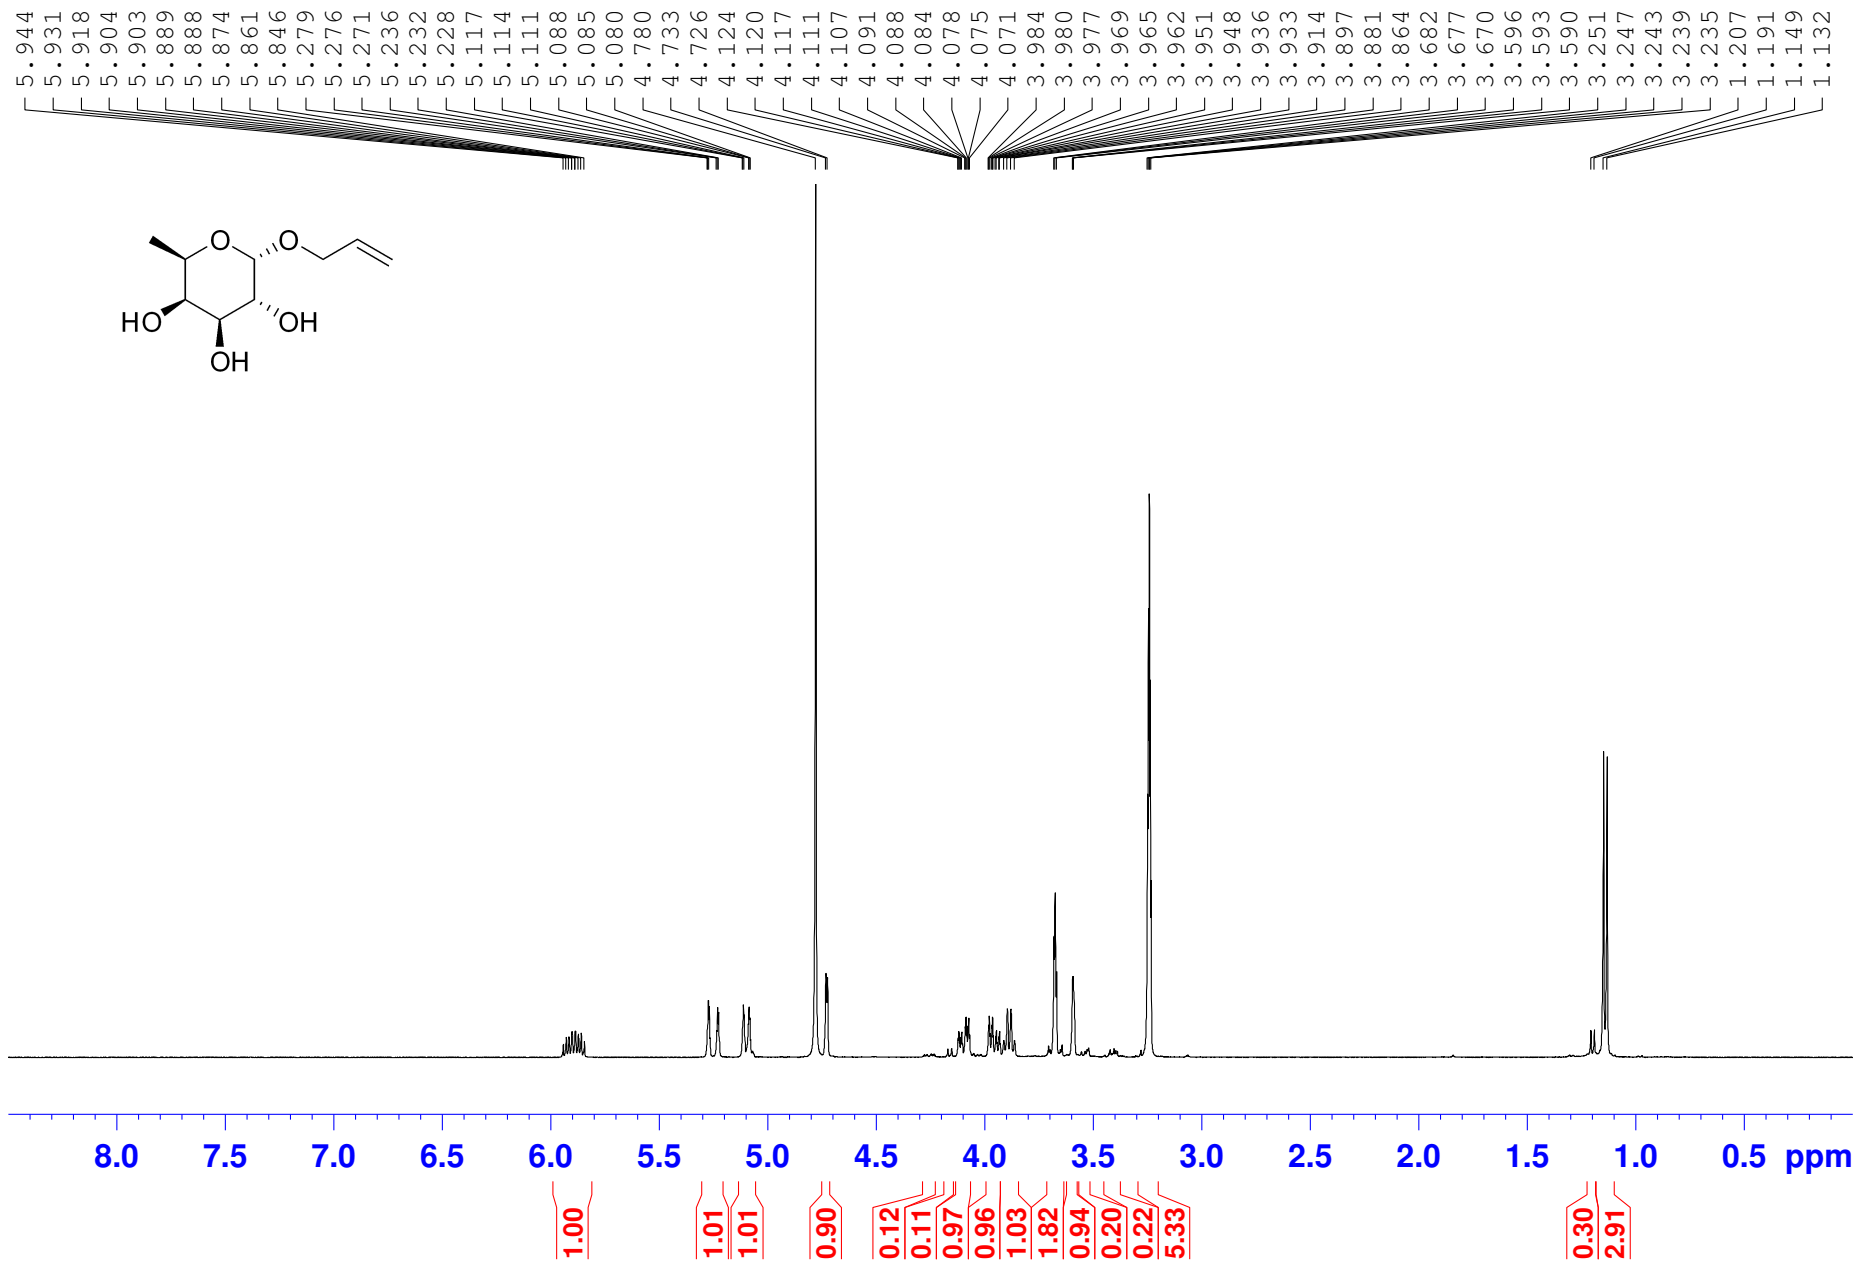

GBK-546pure, <sup>13</sup>C NMR, 400NMR MEOD

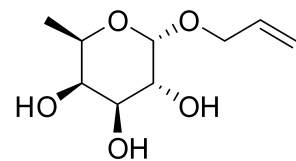

134.36

116.00

98.21

72.23  
70.25  
68.55  
68.12  
66.22

15.21

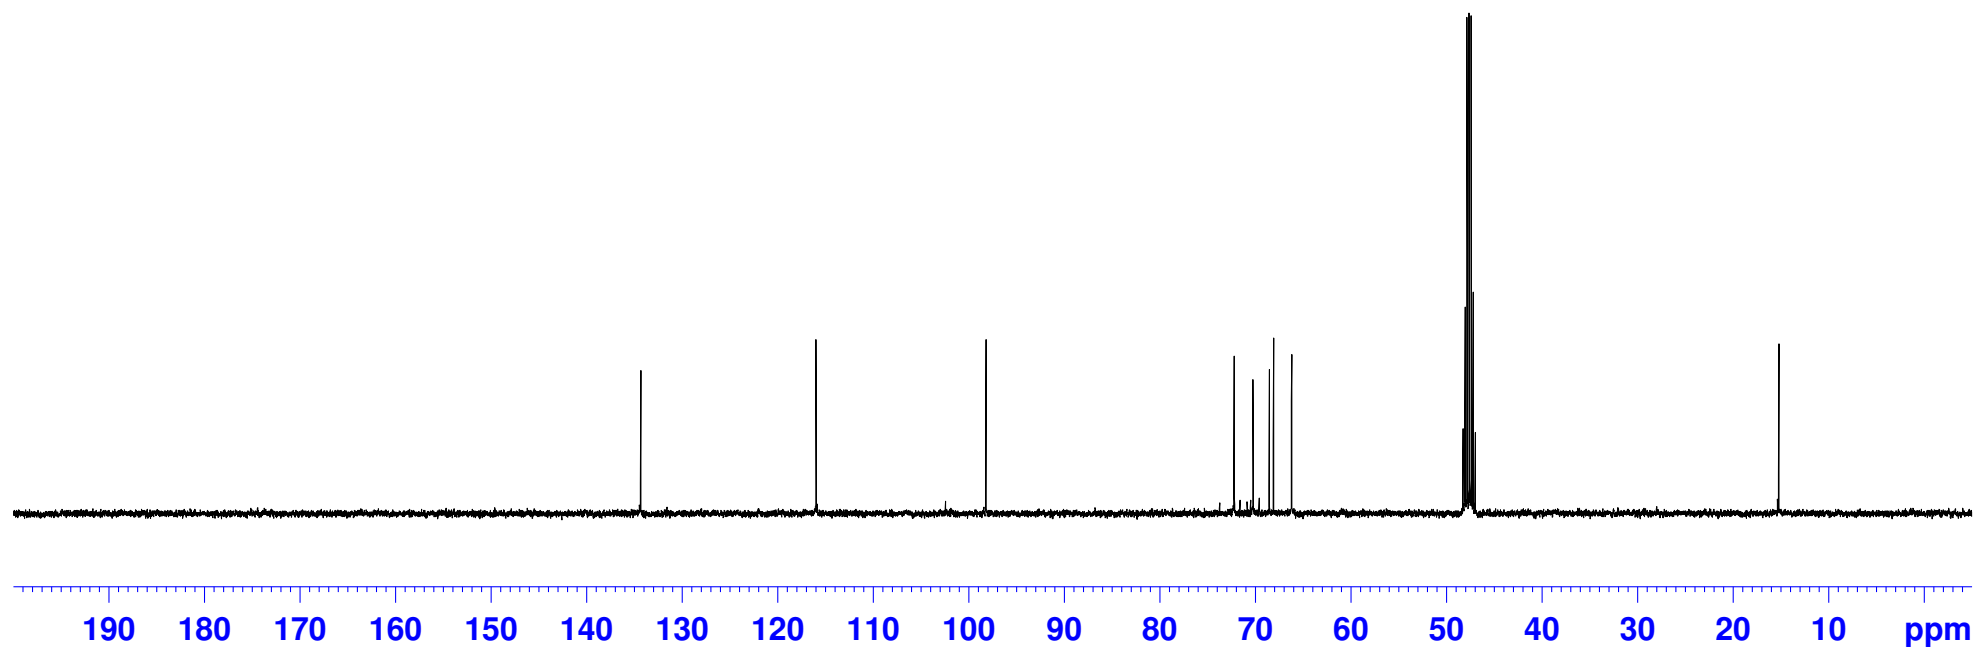

GBK-548-1 1 1 D:\spms\cbc\DrLiu\Nov09 GBK

GBK-548-mix, 1HNMR, 400NMR MEOD

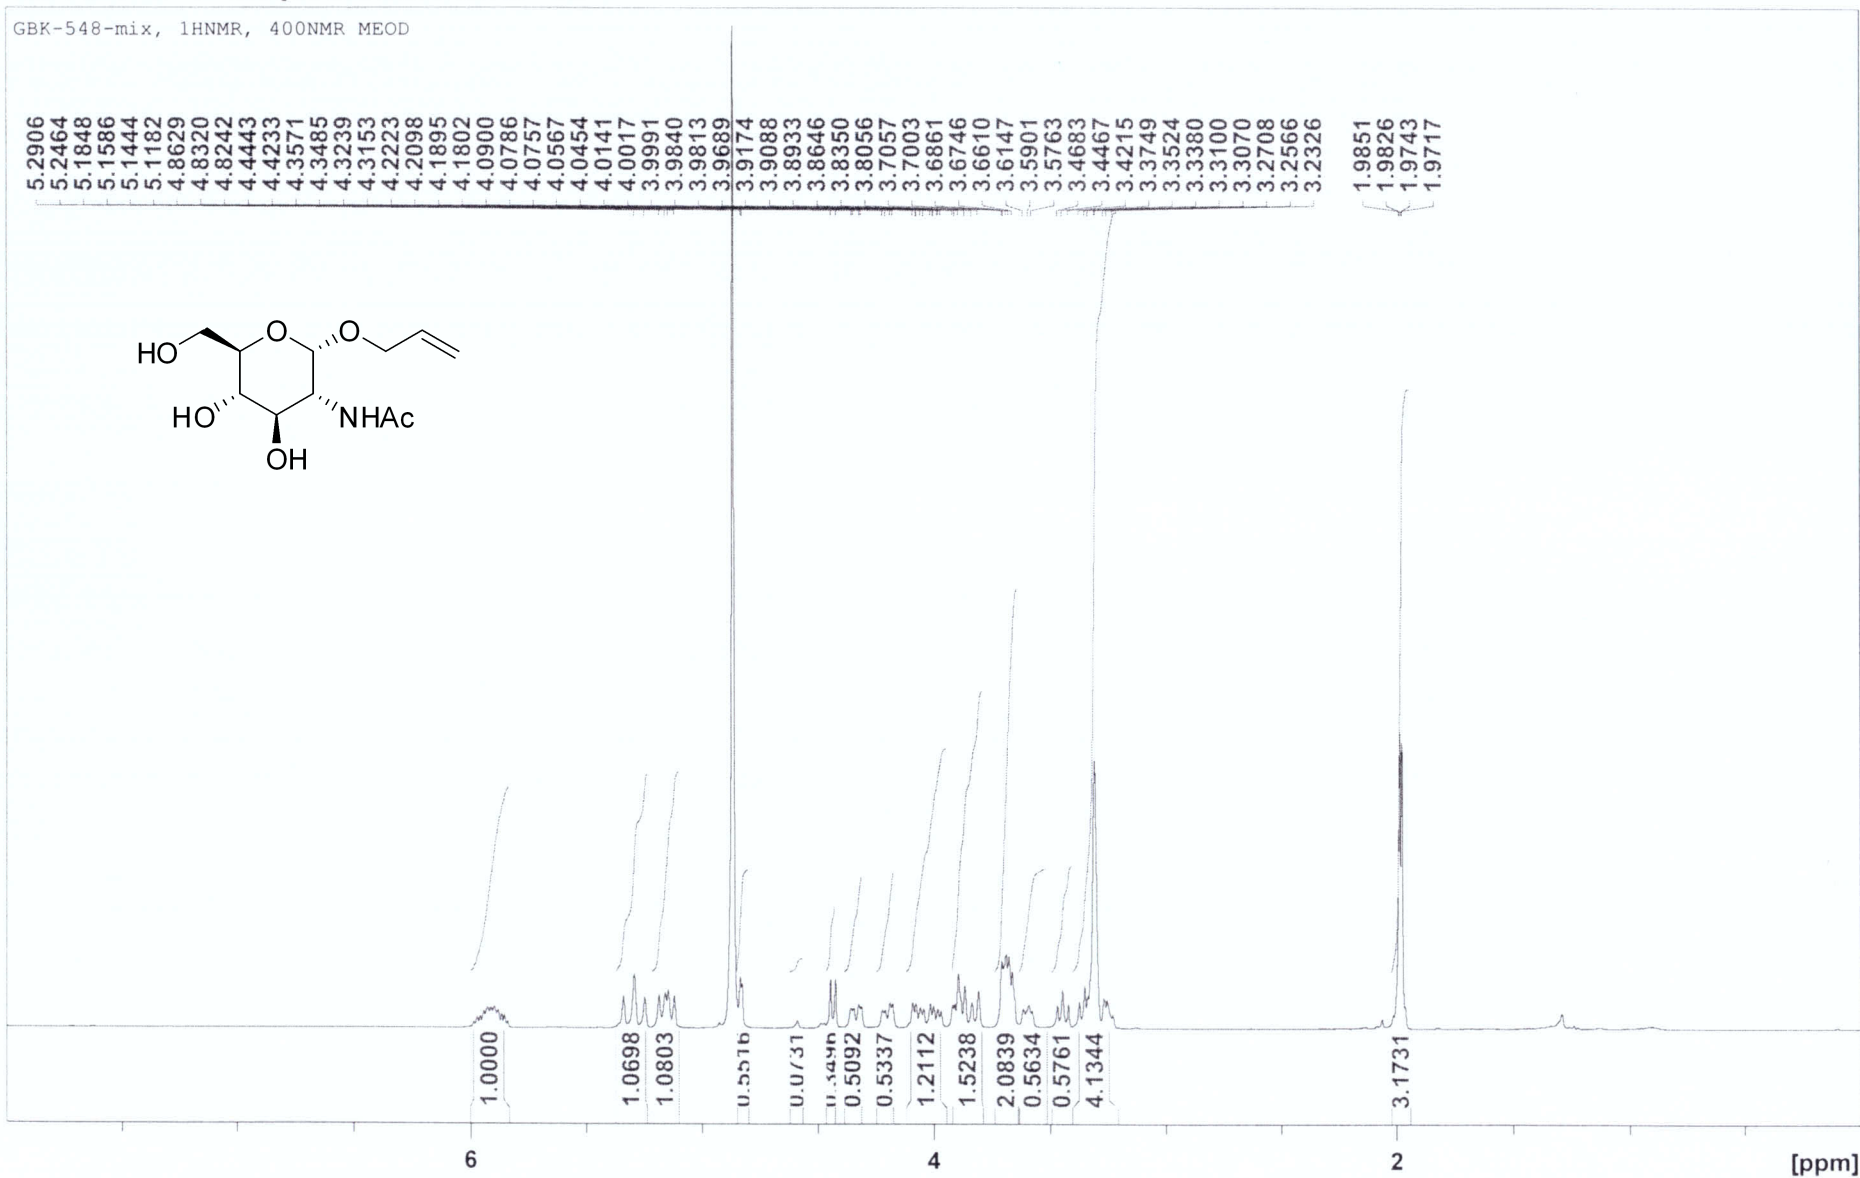

GBK-548, <sup>13</sup>C NMR, 400NMR MEOD

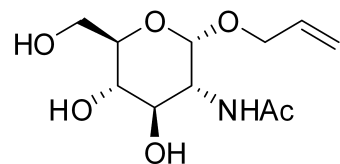

172.29

134.10

116.09

96.28

72.53

71.36

70.99

67.72

61.32

54.00

47.82

47.61

47.40

21.15

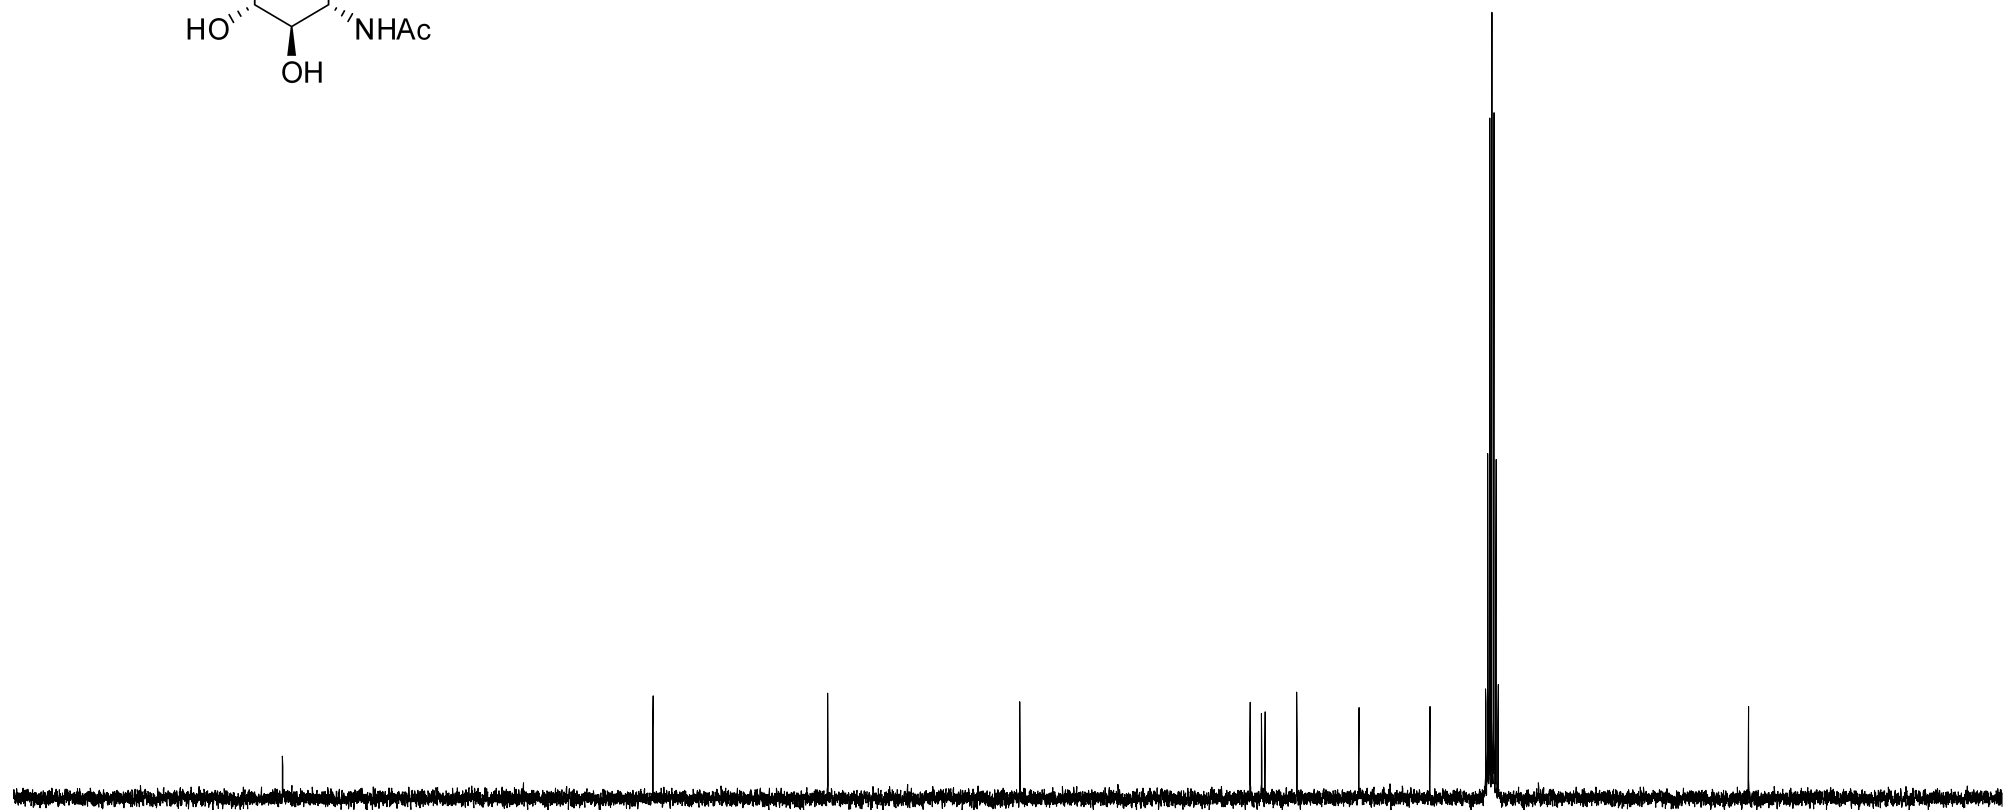

190 180 170 160 150 140 130 120 110 100 90 80 70 60 50 40 30 20 10 ppm

GBK-550, 1HNMR, 400NMR MEOD

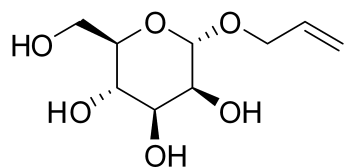

5.984  
5.969  
5.957  
5.941  
5.927  
5.914  
5.900  
5.887  
5.319  
5.316  
5.276  
5.272  
5.181  
5.158  
5.155  
4.854  
4.794  
4.238  
4.235  
4.230  
4.226  
4.222  
4.205  
4.202  
4.197  
4.193  
4.189  
4.110  
4.092  
4.028  
4.025  
4.014  
4.011  
3.996  
3.993  
3.981  
3.978  
3.849  
3.844  
3.814  
3.810  
3.727  
3.717  
3.703  
3.696  
3.688  
3.640  
3.616  
3.593

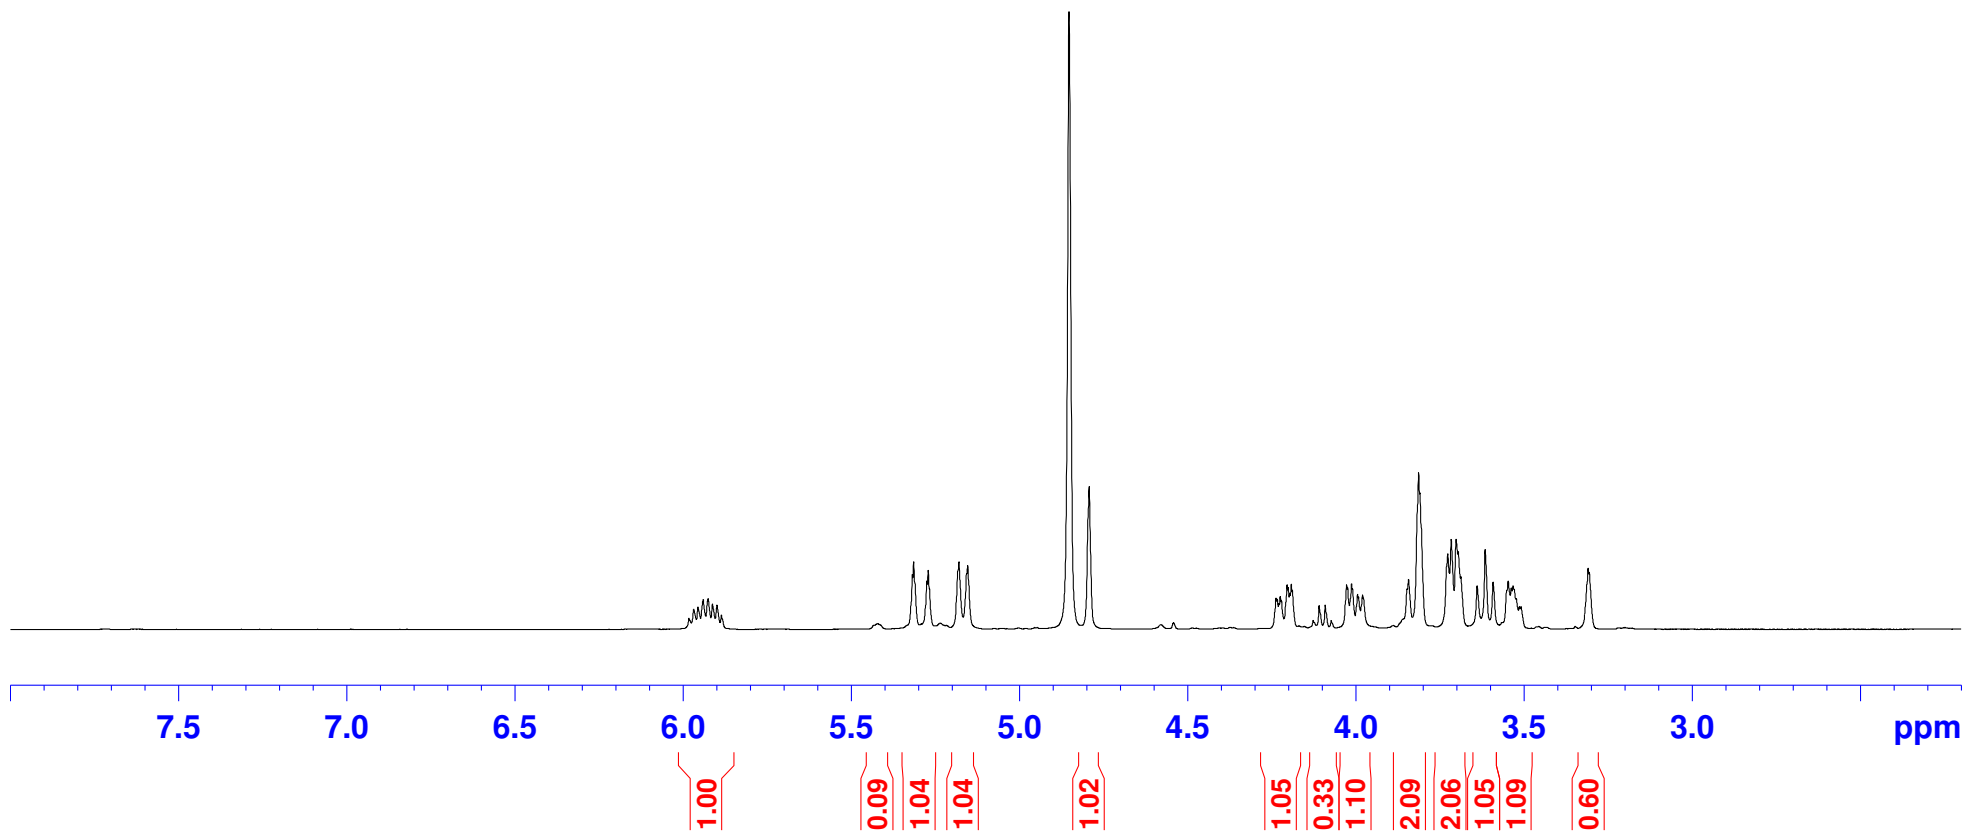



GBK-550, 1HNMR, 400NMR MEOD

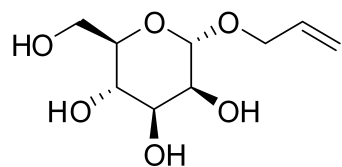

5.984  
5.969  
5.957  
5.941  
5.927  
5.914  
5.900  
5.887  
5.319  
5.316  
5.276  
5.272  
5.181  
5.158  
5.155  
4.854  
4.794  
4.238  
4.235  
4.230  
4.226  
4.222  
4.205  
4.202  
4.197  
4.193  
4.189  
4.110  
4.092  
4.028  
4.025  
4.014  
4.011  
3.996  
3.993  
3.981  
3.978  
3.849  
3.844  
3.814  
3.810  
3.727  
3.717  
3.703  
3.696  
3.688  
3.640  
3.616  
3.593



GBK-551, Av400 MeOD, 01-Dec-10

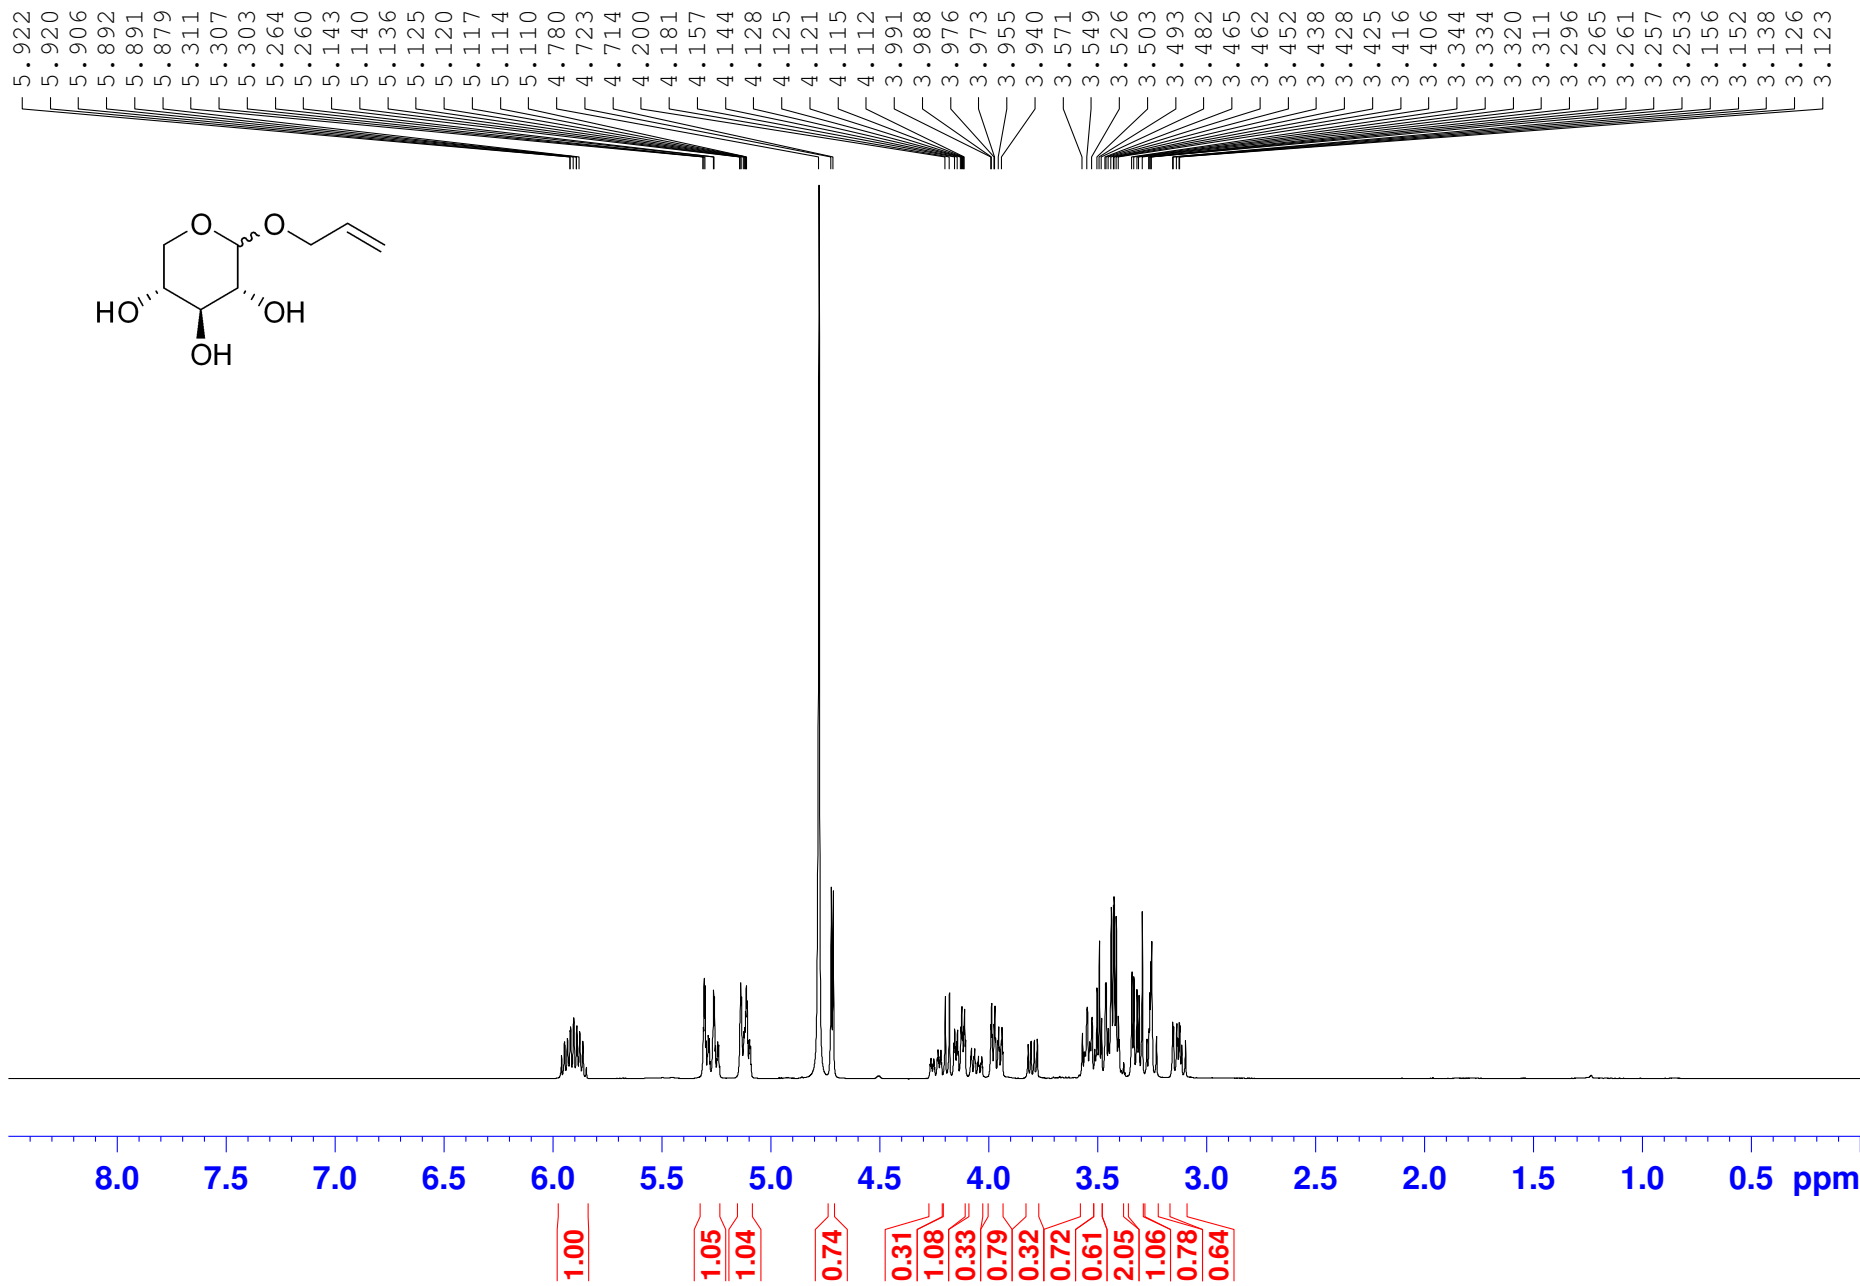

GBK-551, <sup>13</sup>C NMR, 400NMR MEOD

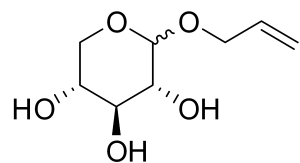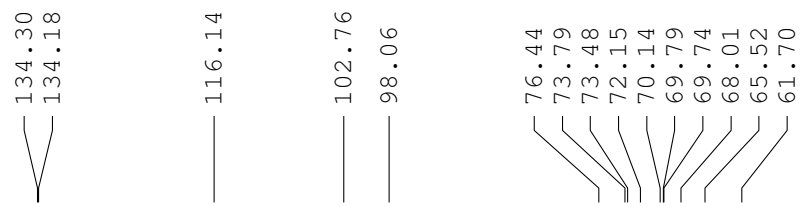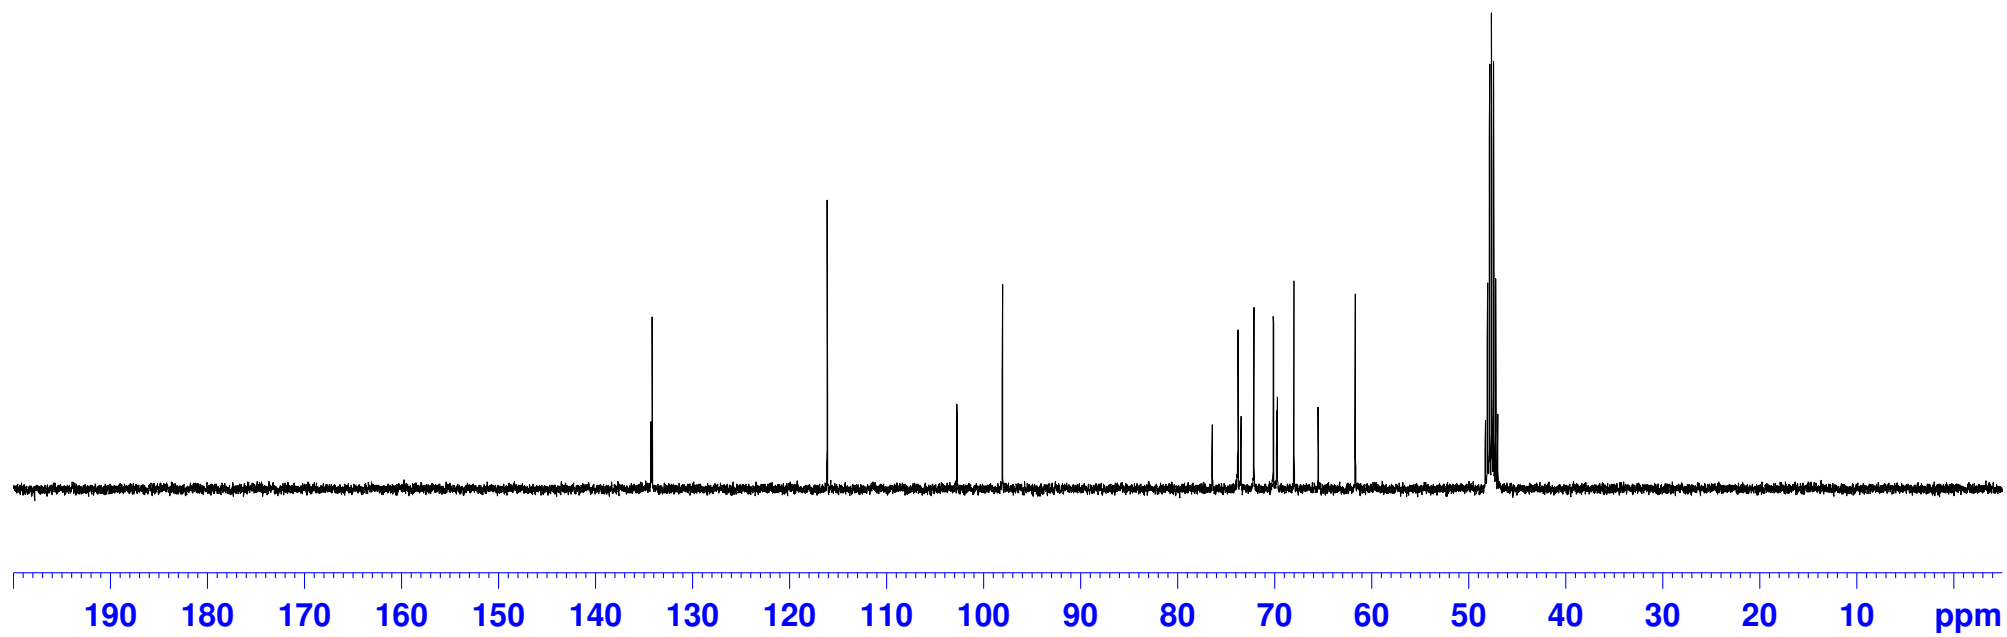

GBK-552, 1HNMR, 400NMR MEOD

5.958  
5.944  
5.929  
5.915  
5.902  
5.888  
5.348  
5.313  
5.287  
5.270  
5.244  
5.205  
5.183  
5.157  
5.135  
4.899  
4.773  
4.765  
4.631  
4.236  
4.226  
4.203  
4.193  
4.093  
4.082  
4.055  
4.042  
4.023  
4.007  
3.986  
3.967  
3.952  
3.920  
3.908  
3.835  
3.802  
3.774  
3.741  
3.733  
3.711  
3.703  
3.689  
3.680  
3.659  
3.599  
3.571  
3.555  
3.542  
3.310

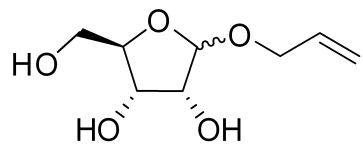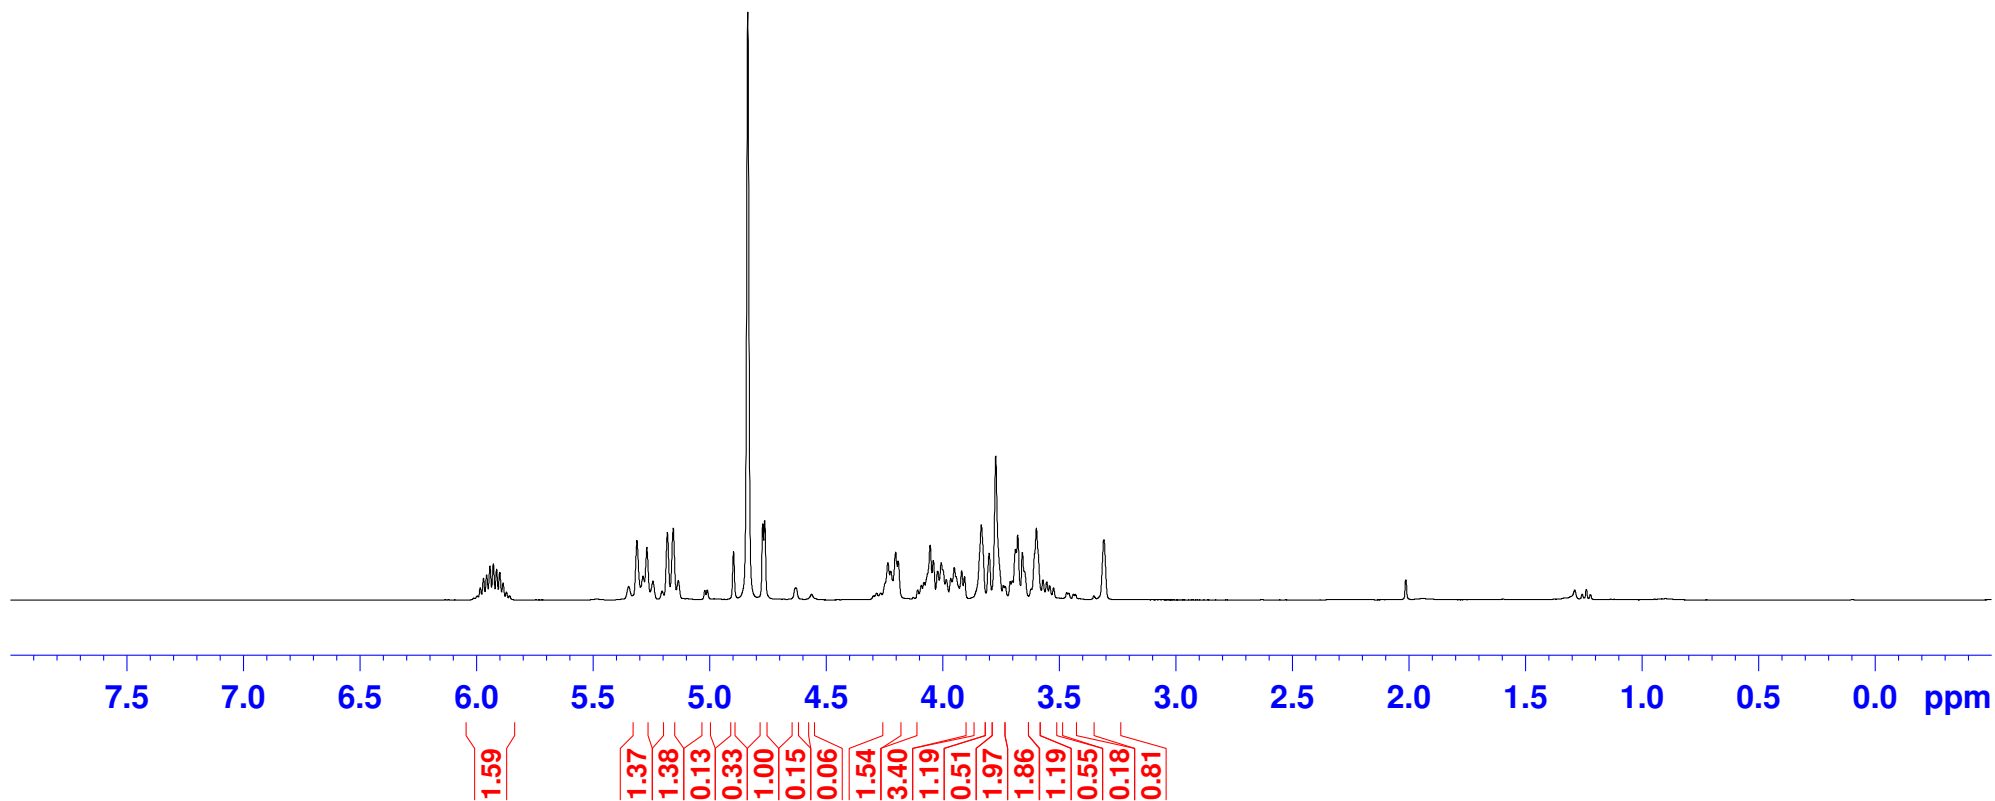

GBK-552, <sup>13</sup>C NMR, 400NMR MEOD

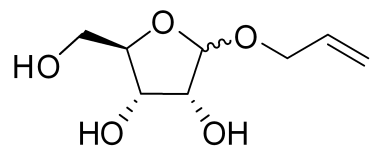

134.33  
134.15  
115.97  
115.77  
106.48  
100.04  
83.49  
74.89  
71.39  
71.13  
69.32  
68.32  
67.83  
66.59  
63.70  
63.59

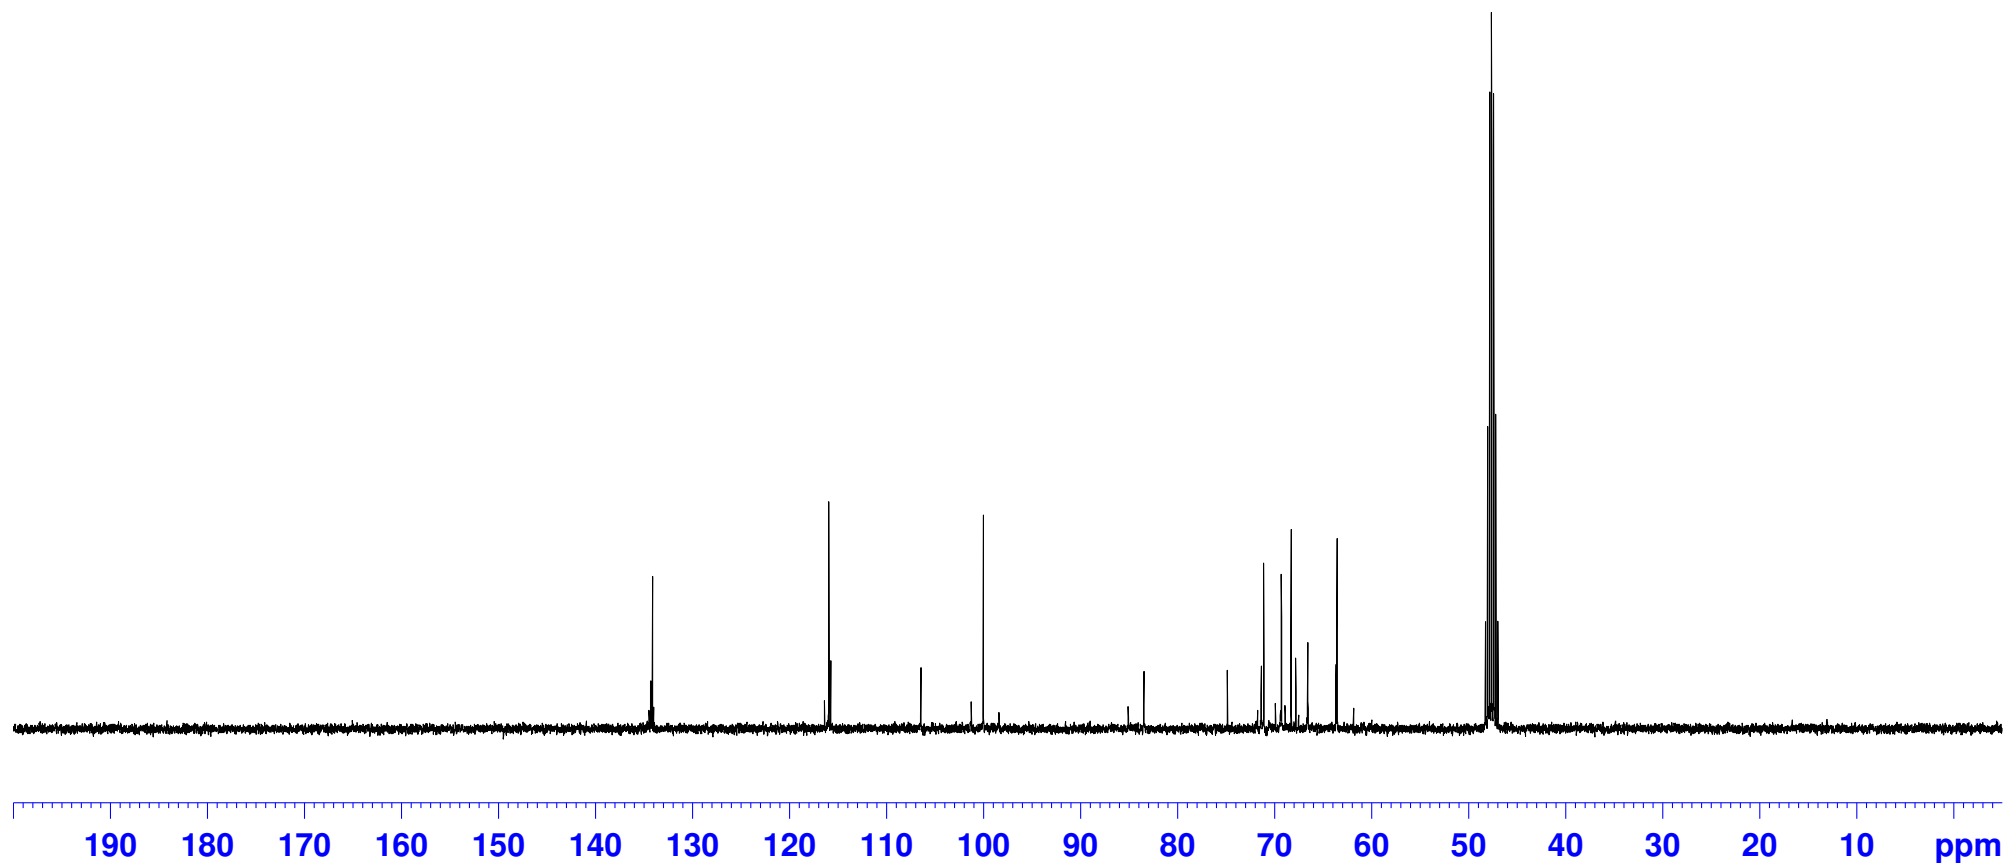

GBK-553-deoxyribose, Av400 MeOD, 01-Dec-10

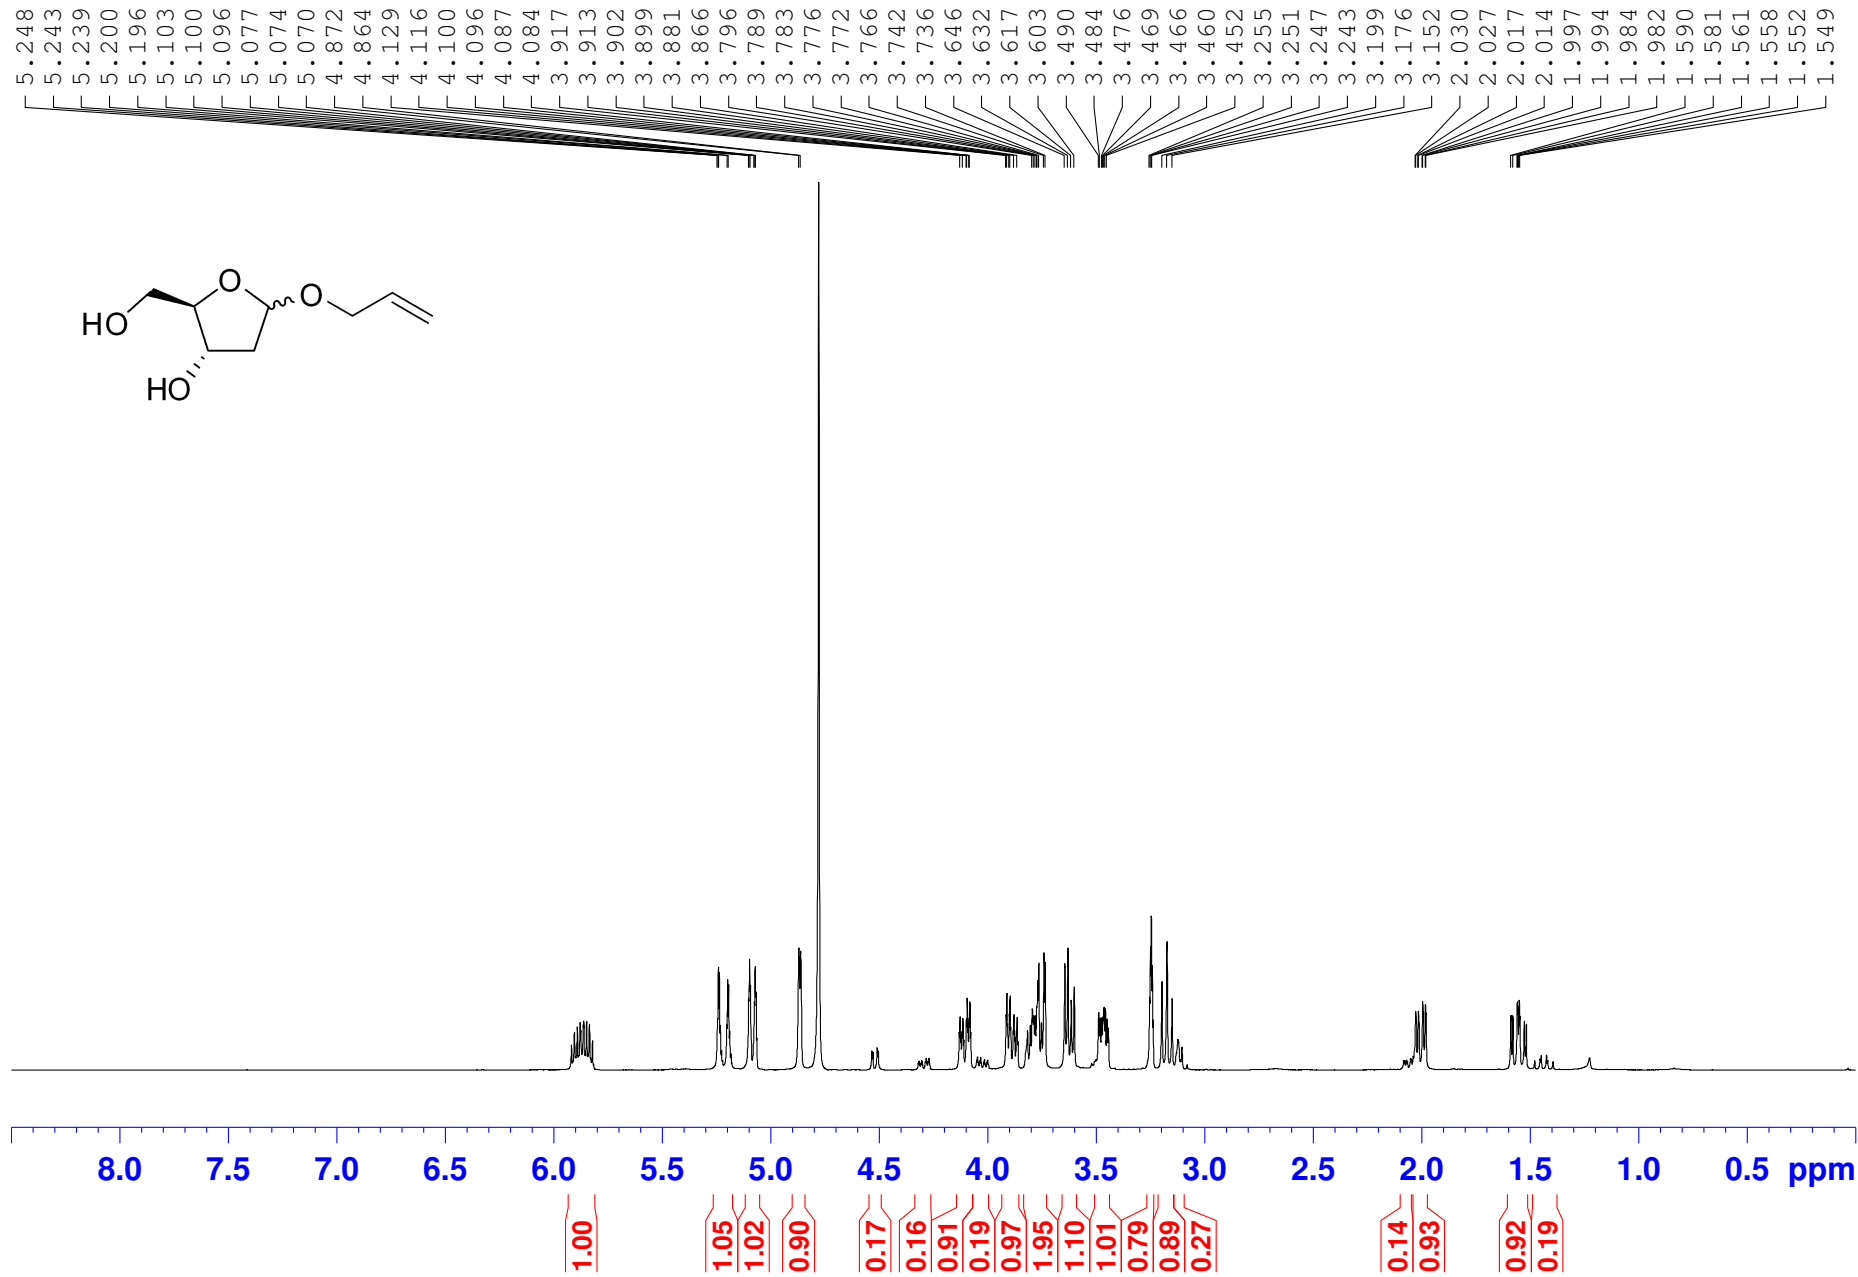

GBK-553 3 1 D:\spms\cbc\DrLiu\Dec10 GBK

GBK-553-deoxyribose, 13C Av400 MeOD, 01-Dec-10

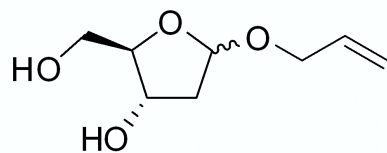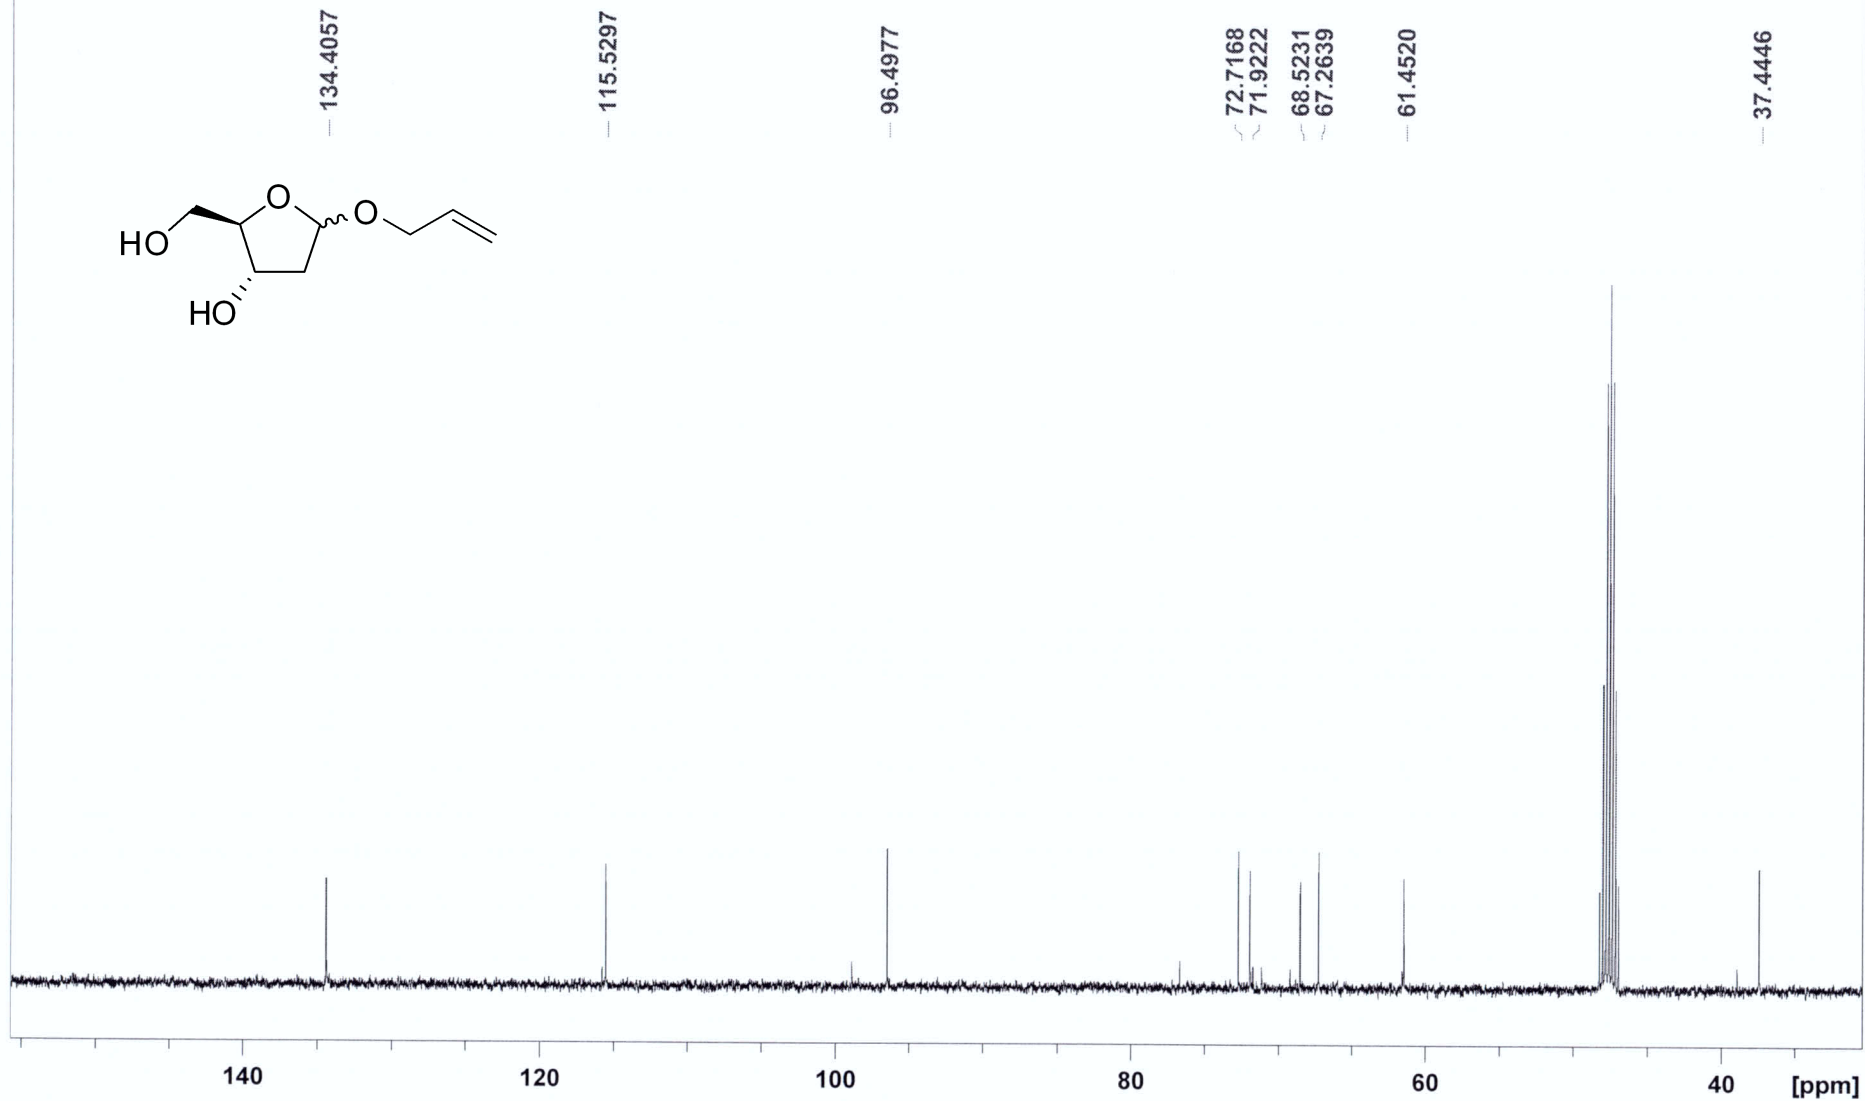

Supplement: c0gc00883d.pdf [file c0gc00883d.pdf]
